# Supplementary material for: Do beaver dams reduce habitat connectivity and salmon productivity in expansive river floodplains?
Source: PeerJ. 2016 Sep 1;4:e2403. doi: 10.7717/peerj.2403 (PMC5012414; doi:10.7717/peerj.2403)
Supplement: Supplemental Information 2 [file peerj-04-2403-s002.xlsx]

## Sheet: RawFishData
River	BiotopeName	StudyAreaName	DATE	SERIESNAME	LENGTH	WEIGHT
Kwethluk	beaver complex	Elbow Orthofluvial Beaver Complex	2008-09-20 09:30:00	Chinook salmon	94	8.7
Kwethluk	beaver complex	Elbow Orthofluvial Beaver Complex	2008-09-20 09:30:00	Chinook salmon	97	8.8
Kwethluk	beaver complex	Elbow Orthofluvial Beaver Complex	2008-09-20 09:30:00	Chinook salmon	89	7.9
Kwethluk	beaver complex	Elbow Orthofluvial Beaver Complex	2008-09-20 09:30:00	Chinook salmon	97	9.9
Kwethluk	beaver complex	Elbow Orthofluvial Beaver Complex	2008-09-20 09:30:00	Chinook salmon	101	10.7
Kwethluk	beaver complex	Elbow Orthofluvial Beaver Complex	2008-09-20 09:30:00	Chinook salmon	93	8.5
Kwethluk	beaver complex	Elbow Orthofluvial Beaver Complex	2008-09-20 09:30:00	Chinook salmon	92	7.4
Kwethluk	beaver complex	Elbow Orthofluvial Beaver Complex	2008-09-20 09:30:00	Chinook salmon	99	9.6
Kwethluk	beaver complex	Elbow Orthofluvial Beaver Complex	2008-09-20 09:30:00	Chinook salmon	89	6.9
Kwethluk	beaver complex	Elbow Orthofluvial Beaver Complex	2008-09-20 09:30:00	Chinook salmon	84	7.1
Kwethluk	beaver complex	Elbow Orthofluvial Beaver Complex	2008-09-20 09:30:00	Chinook salmon	96	9.4
Kwethluk	beaver complex	Elbow Orthofluvial Beaver Complex	2008-09-20 09:30:00	Chinook salmon	100	9.6
Kwethluk	beaver complex	Elbow Orthofluvial Beaver Complex	2008-09-20 09:30:00	Coho Salmon	95	9
Kwethluk	beaver complex	Elbow Orthofluvial Beaver Complex	2008-09-20 09:30:00	Coho Salmon	96	8.9
Kwethluk	beaver complex	Elbow Orthofluvial Beaver Complex	2008-09-20 09:30:00	Coho Salmon	91	8
Kwethluk	beaver complex	Elbow Orthofluvial Beaver Complex	2008-09-20 09:30:00	Coho Salmon	103	11
Kwethluk	beaver complex	Elbow Orthofluvial Beaver Complex	2008-09-20 09:30:00	Coho Salmon	95	8.5
Kwethluk	beaver complex	Elbow Orthofluvial Beaver Complex	2008-09-20 09:30:00	Coho Salmon	80	5.6
Kwethluk	beaver complex	Elbow Orthofluvial Beaver Complex	2008-09-20 09:30:00	Coho Salmon	97	10
Kwethluk	beaver complex	Elbow Orthofluvial Beaver Complex	2008-09-20 09:30:00	Coho Salmon	96	9.8
Kwethluk	beaver complex	Elbow Orthofluvial Beaver Complex	2008-09-20 09:30:00	Coho Salmon	96	11
Kwethluk	beaver complex	Elbow Orthofluvial Beaver Complex	2008-09-20 09:30:00	Coho Salmon	101	12.7
Kwethluk	beaver complex	Elbow Orthofluvial Beaver Complex	2008-09-20 09:30:00	Coho Salmon	92	8.4
Kwethluk	beaver complex	Elbow Orthofluvial Beaver Complex	2008-09-20 09:30:00	Coho Salmon	89	6.5
Kwethluk	beaver complex	Elbow Orthofluvial Beaver Complex	2008-09-20 09:30:00	Coho Salmon	94	8
Kwethluk	beaver complex	Elbow Orthofluvial Beaver Complex	2008-09-20 09:30:00	Coho Salmon	90	6.9
Kwethluk	beaver complex	Elbow Orthofluvial Beaver Complex	2008-09-20 09:30:00	Coho Salmon	84	6.2
Kwethluk	beaver complex	Elbow Orthofluvial Beaver Complex	2008-09-20 09:30:00	Coho Salmon	91	7.7
Kwethluk	beaver complex	Elbow Orthofluvial Beaver Complex	2008-09-20 09:30:00	Coho Salmon	99	9.7
Kwethluk	beaver complex	Elbow Orthofluvial Beaver Complex	2008-09-20 09:30:00	Coho Salmon	96	8.8
Kwethluk	beaver complex	Elbow Orthofluvial Beaver Complex	2008-09-20 09:30:00	Coho Salmon	91	7.3
Kwethluk	beaver complex	Elbow Orthofluvial Beaver Complex	2008-09-20 09:30:00	Coho Salmon	92	7.5
Kwethluk	beaver complex	Elbow Orthofluvial Beaver Complex	2008-09-20 09:30:00	Coho Salmon	95	7.7
Kwethluk	beaver complex	Elbow Orthofluvial Beaver Complex	2008-09-20 09:30:00	Coho Salmon	82	5.2
Kwethluk	beaver complex	Elbow Orthofluvial Beaver Complex	2008-09-20 09:30:00	Coho Salmon	71	3.2
Kwethluk	beaver complex	Elbow Orthofluvial Beaver Complex	2008-09-20 09:30:00	Coho Salmon	71	3.6
Kwethluk	beaver complex	Elbow Orthofluvial Beaver Complex	2008-09-20 09:30:00	Coho Salmon	90	8.7
Kwethluk	beaver complex	Elbow Orthofluvial Beaver Complex	2008-09-20 09:30:00	Coho Salmon	90	8.6
Kwethluk	beaver complex	Elbow Orthofluvial Beaver Complex	2008-09-20 09:30:00	Coho Salmon	99	12
Kwethluk	beaver complex	Elbow Orthofluvial Beaver Complex	2008-09-20 09:30:00	Coho Salmon	94	11
Kwethluk	beaver complex	Elbow Orthofluvial Beaver Complex	2008-09-20 09:30:00	Coho Salmon	93	9.9
Kwethluk	beaver complex	Elbow Orthofluvial Beaver Complex	2008-09-20 09:30:00	Coho Salmon	91	6.9
Kwethluk	beaver complex	Elbow Orthofluvial Beaver Complex	2008-09-20 09:30:00	Coho Salmon	96	8.7
Kwethluk	beaver complex	Elbow Orthofluvial Beaver Complex	2008-09-20 09:30:00	Coho Salmon	96	8.4
Kwethluk	beaver complex	Elbow Orthofluvial Beaver Complex	2008-09-20 09:30:00	Coho Salmon	96	9.3
Kwethluk	beaver complex	Elbow Orthofluvial Beaver Complex	2008-09-20 09:30:00	Coho Salmon	92	7.8
Kwethluk	beaver complex	Elbow Orthofluvial Beaver Complex	2008-09-20 09:30:00	Coho Salmon	111	13.4
Kwethluk	beaver complex	Elbow Orthofluvial Beaver Complex	2008-09-20 09:30:00	Coho Salmon	94	8.4
Kwethluk	beaver complex	Elbow Orthofluvial Beaver Complex	2008-09-20 09:30:00	Coho Salmon	93	7.8
Kwethluk	beaver complex	Elbow Orthofluvial Beaver Complex	2008-09-20 09:30:00	Coho Salmon	91	7.7
Kwethluk	beaver complex	Elbow Orthofluvial Beaver Complex	2008-09-20 09:30:00	Coho Salmon	96	8.7
Kwethluk	beaver complex	Elbow Orthofluvial Beaver Complex	2008-09-20 09:30:00	Coho Salmon	97	9.2
Kwethluk	beaver complex	Elbow Orthofluvial Beaver Complex	2008-09-20 09:30:00	Coho Salmon	96	9.1
Kwethluk	beaver complex	Elbow Orthofluvial Beaver Complex	2008-09-20 09:30:00	Coho Salmon	95	8.9
Kwethluk	beaver complex	Elbow Orthofluvial Beaver Complex	2008-09-20 09:30:00	Coho Salmon	87	6.8
Kwethluk	beaver complex	Elbow Orthofluvial Beaver Complex	2008-09-20 09:30:00	Coho Salmon	84	6.4
Kwethluk	beaver complex	Elbow Orthofluvial Beaver Complex	2008-09-20 09:30:00	Coho Salmon	80	5.5
Kwethluk	beaver complex	Elbow Orthofluvial Beaver Complex	2008-09-20 09:30:00	Coho Salmon	92	7.9
Kwethluk	beaver complex	Elbow Orthofluvial Beaver Complex	2008-09-20 09:30:00	Coho Salmon	89	8.1
Kwethluk	beaver complex	Elbow Orthofluvial Beaver Complex	2008-09-20 09:30:00	Coho Salmon	93	7.8
Kwethluk	beaver complex	Elbow Orthofluvial Beaver Complex	2008-09-20 09:30:00	Coho Salmon	91	8.2
Kwethluk	beaver complex	Elbow Orthofluvial Beaver Complex	2008-09-20 09:30:00	Coho Salmon	99	9
Kwethluk	beaver complex	Elbow Orthofluvial Beaver Complex	2008-09-20 09:30:00	Coho Salmon	95	9.3
Kwethluk	beaver complex	Elbow Orthofluvial Beaver Complex	2008-09-20 09:30:00	Coho Salmon	99	9.5
Kwethluk	beaver complex	Elbow Orthofluvial Beaver Complex	2008-09-20 09:30:00	Coho Salmon	96	8.5
Kwethluk	beaver complex	Elbow Orthofluvial Beaver Complex	2008-09-20 09:30:00	Coho Salmon	90	6.5
Kwethluk	beaver complex	Elbow Orthofluvial Beaver Complex	2008-09-20 09:30:00	Coho Salmon	104	11
Kwethluk	beaver complex	Elbow Orthofluvial Beaver Complex	2008-09-20 09:30:00	Coho Salmon	103	11.5
Kwethluk	beaver complex	Elbow Orthofluvial Beaver Complex	2008-09-20 09:30:00	Coho Salmon	82	6
Kwethluk	beaver complex	Elbow Orthofluvial Beaver Complex	2008-09-20 09:30:00	Coho Salmon	104	11
Kwethluk	beaver complex	Elbow Orthofluvial Beaver Complex	2008-09-20 09:30:00	Coho Salmon	90	7.2
Kwethluk	beaver complex	Elbow Orthofluvial Beaver Complex	2008-09-20 09:30:00	Coho Salmon	97	8.7
Kwethluk	beaver complex	Elbow Orthofluvial Beaver Complex	2008-09-20 09:30:00	Coho Salmon	94	7.4
Kwethluk	beaver complex	Elbow Orthofluvial Beaver Complex	2008-09-20 09:30:00	Coho Salmon	101	9.3
Kwethluk	beaver complex	Elbow Orthofluvial Beaver Complex	2008-09-20 09:30:00	Coho Salmon	102	11.9
Kwethluk	beaver complex	Elbow Orthofluvial Beaver Complex	2008-09-20 09:30:00	Coho Salmon	96	9.2
Kwethluk	beaver complex	Elbow Orthofluvial Beaver Complex	2008-09-20 09:30:00	Coho Salmon	96	9.6
Kwethluk	beaver complex	Elbow Orthofluvial Beaver Complex	2008-09-20 09:30:00	Coho Salmon	90	7.7
Kwethluk	beaver complex	Elbow Orthofluvial Beaver Complex	2008-09-20 09:30:00	Coho Salmon	96	9.8
Kwethluk	beaver complex	Elbow Orthofluvial Beaver Complex	2008-09-20 09:30:00	Coho Salmon	102	10.4
Kwethluk	beaver complex	Elbow Orthofluvial Beaver Complex	2008-09-20 09:30:00	Coho Salmon	98	9.7
Kwethluk	beaver complex	Elbow Orthofluvial Beaver Complex	2008-09-20 09:30:00	Coho Salmon	92	7.6
Kwethluk	beaver complex	Elbow Orthofluvial Beaver Complex	2008-09-20 09:30:00	Coho Salmon	88	6.6
Kwethluk	beaver complex	Elbow Orthofluvial Beaver Complex	2008-09-20 09:30:00	Coho Salmon	86	6.6
Kwethluk	beaver complex	Elbow Orthofluvial Beaver Complex	2008-09-20 09:30:00	Coho Salmon	96	9.5
Kwethluk	beaver complex	Elbow Orthofluvial Beaver Complex	2008-09-20 09:30:00	Coho Salmon	94	8.7
Kwethluk	beaver complex	Elbow Orthofluvial Beaver Complex	2008-09-20 09:30:00	Coho Salmon	76	4.9
Kwethluk	beaver complex	Elbow Orthofluvial Beaver Complex	2008-09-20 09:30:00	Coho Salmon	94	8.8
Kwethluk	beaver complex	Elbow Orthofluvial Beaver Complex	2008-09-20 09:30:00	Coho Salmon	99	10.2
Kwethluk	beaver complex	Elbow Orthofluvial Beaver Complex	2008-09-20 09:30:00	Coho Salmon	99	10.1
Kwethluk	beaver complex	Elbow Orthofluvial Beaver Complex	2008-09-20 09:30:00	Coho Salmon	87	6.6
Kwethluk	beaver complex	Elbow Orthofluvial Beaver Complex	2008-09-20 09:30:00	Coho Salmon	97	9.4
Kwethluk	beaver complex	Elbow Orthofluvial Beaver Complex	2008-09-20 09:30:00	Coho Salmon	102	11.1
Kwethluk	beaver complex	Elbow Orthofluvial Beaver Complex	2008-09-20 09:30:00	Coho Salmon	92	8.3
Kwethluk	beaver complex	Elbow Orthofluvial Beaver Complex	2008-09-20 09:30:00	Coho Salmon	94	8.2
Kwethluk	beaver complex	Elbow Orthofluvial Beaver Complex	2008-09-20 09:30:00	Coho Salmon	91	7.1
Kwethluk	beaver complex	Elbow Orthofluvial Beaver Complex	2008-09-20 09:30:00	Coho Salmon	93	8.6
Kwethluk	beaver complex	Elbow Orthofluvial Beaver Complex	2008-09-20 09:30:00	Coho Salmon	104	11
Kwethluk	beaver complex	Elbow Orthofluvial Beaver Complex	2008-09-20 09:30:00	Coho Salmon	85	6
Kwethluk	beaver complex	Elbow Orthofluvial Beaver Complex	2008-09-20 09:30:00	Coho Salmon	92	8.1
Kwethluk	beaver complex	Elbow Orthofluvial Beaver Complex	2008-09-20 09:30:00	Coho Salmon	92	7.9
Kwethluk	beaver complex	Elbow Orthofluvial Beaver Complex	2008-09-20 09:30:00	Coho Salmon	102	9.6
Kwethluk	beaver complex	Elbow Orthofluvial Beaver Complex	2008-09-20 09:30:00	Coho Salmon	95	8.4
Kwethluk	beaver complex	Elbow Orthofluvial Beaver Complex	2008-09-20 09:30:00	Coho Salmon	93	8
Kwethluk	beaver complex	Elbow Orthofluvial Beaver Complex	2008-09-20 09:30:00	Coho Salmon	94	8.1
Kwethluk	beaver complex	Elbow Orthofluvial Beaver Complex	2008-09-20 09:30:00	Coho Salmon	96	8.1
Kwethluk	beaver complex	Elbow Orthofluvial Beaver Complex	2008-09-20 09:30:00	Coho Salmon	93	8
Kwethluk	beaver complex	Elbow Orthofluvial Beaver Complex	2008-09-20 09:30:00	Coho Salmon	90	7.5
Kwethluk	Main channel	Athens Shallow Shore	2008-08-12 10:20:00	Arctic lamprey	159	4.2
Kwethluk	Main channel	Athens Shallow Shore	2008-08-12 10:20:00	Arctic lamprey	135	2.6
Kwethluk	Main channel	Athens Shallow Shore	2008-08-12 10:20:00	Arctic lamprey	101	1.2
Kwethluk	Main channel	Athens Shallow Shore	2008-08-12 10:20:00	Arctic lamprey	138	2.8
Kwethluk	Main channel	Athens Shallow Shore	2008-08-12 10:20:00	Arctic lamprey	60	0.4
Kwethluk	Main channel	Athens Shallow Shore	2008-08-12 10:20:00	Arctic lamprey	152	2.4
Kwethluk	Main channel	Athens Shallow Shore	2008-08-12 10:20:00	Arctic lamprey	122	2.4
Kwethluk	Main channel	Athens Shallow Shore	2008-08-12 10:20:00	Arctic lamprey	61	0.6
Kwethluk	Main channel	Athens Shallow Shore	2008-08-12 10:20:00	Arctic lamprey	135	3.7
Kwethluk	Main channel	Athens Shallow Shore	2008-08-12 10:20:00	Arctic lamprey	130	3.5
Kwethluk	Main channel	Athens Shallow Shore	2008-08-12 10:20:00	Arctic lamprey	170	6.2
Kwethluk	Main channel	Athens Shallow Shore	2008-08-12 10:20:00	Arctic lamprey	173	6.1
Kwethluk	Main channel	Athens Shallow Shore	2008-08-12 10:20:00	Arctic lamprey	190	8
Kwethluk	Main channel	Athens Shallow Shore	2008-08-12 10:20:00	Arctic lamprey	91	0.9
Kwethluk	Main channel	Athens Shallow Shore	2008-08-12 10:20:00	Chinook salmon	55	2.1
Kwethluk	Main channel	Athens Shallow Shore	2008-09-16 10:53:00	Chinook salmon	66	3
Kwethluk	Main channel	Athens Shallow Shore	2008-08-12 10:20:00	Chinook salmon	64	2.6
Kwethluk	Main channel	Athens Shallow Shore	2008-08-12 10:20:00	Chinook salmon	59	2
Kwethluk	Main channel	Athens Shallow Shore	2008-08-12 10:20:00	Chinook salmon	59	2
Kwethluk	Main channel	Athens Shallow Shore	2008-08-12 10:20:00	Chinook salmon	56	1.3
Kwethluk	Main channel	Athens Shallow Shore	2008-06-24 11:25:00	Chum Salmon	38	0.4
Kwethluk	Main channel	Athens Shallow Shore	2008-06-24 11:25:00	Coho Salmon	38	0.3
Kwethluk	Main channel	Athens Shallow Shore	2008-06-24 11:25:00	Coho Salmon	37	0.7
Kwethluk	Main channel	Athens Shallow Shore	2008-06-24 11:25:00	Coho Salmon	44	0.3
Kwethluk	Main channel	Athens Shallow Shore	2008-06-24 11:25:00	Coho Salmon	41	0.5
Kwethluk	Main channel	Athens Shallow Shore	2008-06-24 11:25:00	Coho Salmon	36	0.4
Kwethluk	Main channel	Athens Shallow Shore	2008-06-24 11:25:00	Coho Salmon	38	0.5
Kwethluk	Main channel	Athens Shallow Shore	2008-06-24 11:25:00	Coho Salmon	38	0.6
Kwethluk	Main channel	Athens Shallow Shore	2008-06-24 11:25:00	Coho Salmon	32	0.3
Kwethluk	Main channel	Athens Shallow Shore	2008-06-24 11:25:00	Coho Salmon	37	0.3
Kwethluk	Main channel	Athens Shallow Shore	2008-06-24 11:25:00	Coho Salmon	33	0.4
Kwethluk	Main channel	Athens Shallow Shore	2008-06-24 11:25:00	Coho Salmon	37	0.4
Kwethluk	Main channel	Athens Shallow Shore	2008-06-24 11:25:00	Coho Salmon	40	0.6
Kwethluk	Main channel	Athens Shallow Shore	2008-06-24 11:25:00	Coho Salmon	35	0.2
Kwethluk	Main channel	Athens Shallow Shore	2008-06-24 11:25:00	Coho Salmon	37	0.6
Kwethluk	Main channel	Athens Shallow Shore	2008-06-24 11:25:00	Coho Salmon	30	0.2
Kwethluk	Main channel	Athens Shallow Shore	2008-06-24 11:25:00	Coho Salmon	38	0.4
Kwethluk	Main channel	Athens Shallow Shore	2008-06-24 11:25:00	Coho Salmon	39	0.6
Kwethluk	Main channel	Athens Shallow Shore	2008-06-24 11:25:00	Coho Salmon	39	0.5
Kwethluk	Main channel	Athens Shallow Shore	2008-06-24 11:25:00	Coho Salmon	38	0.4
Kwethluk	Main channel	Athens Shallow Shore	2008-06-24 11:25:00	Coho Salmon	46	1.1
Kwethluk	Main channel	Athens Shallow Shore	2008-06-24 11:25:00	Coho Salmon	40	0.6
Kwethluk	Main channel	Athens Shallow Shore	2008-06-24 11:25:00	Coho Salmon	41	0.5
Kwethluk	Main channel	Athens Shallow Shore	2008-06-24 11:25:00	Coho Salmon	42	0.9
Kwethluk	Main channel	Athens Shallow Shore	2008-06-24 11:25:00	Coho Salmon	42	0.5
Kwethluk	Main channel	Athens Shallow Shore	2008-06-24 11:25:00	Coho Salmon	39	0.5
Kwethluk	Main channel	Athens Shallow Shore	2008-06-24 11:25:00	Coho Salmon	39	0.4
Kwethluk	Main channel	Athens Shallow Shore	2008-06-24 11:25:00	Coho Salmon	42	0.5
Kwethluk	Main channel	Athens Shallow Shore	2008-06-24 11:25:00	Coho Salmon	39	0.3
Kwethluk	Main channel	Athens Shallow Shore	2008-06-24 11:25:00	Coho Salmon	46	0.7
Kwethluk	Main channel	Athens Shallow Shore	2008-06-24 11:25:00	Coho Salmon	42	0.6
Kwethluk	Main channel	Athens Shallow Shore	2008-06-24 11:25:00	Coho Salmon	39	0.4
Kwethluk	Main channel	Athens Shallow Shore	2008-06-24 11:25:00	Coho Salmon	46	0.7
Kwethluk	Main channel	Athens Shallow Shore	2008-06-24 11:25:00	Coho Salmon	39	0.4
Kwethluk	Main channel	Athens Shallow Shore	2008-06-24 11:25:00	Coho Salmon	39	0.4
Kwethluk	Main channel	Athens Shallow Shore	2008-06-24 11:25:00	Coho Salmon	39	0.4
Kwethluk	Main channel	Athens Shallow Shore	2008-06-24 11:25:00	Coho Salmon	38	0.5
Kwethluk	Main channel	Athens Shallow Shore	2008-06-24 11:25:00	Coho Salmon	41	0.4
Kwethluk	Main channel	Athens Shallow Shore	2008-06-24 11:25:00	Coho Salmon	40	0.4
Kwethluk	Main channel	Athens Shallow Shore	2008-06-24 11:25:00	Coho Salmon	43	0.6
Kwethluk	Main channel	Athens Shallow Shore	2008-06-24 11:25:00	Coho Salmon	39	0.4
Kwethluk	Main channel	Athens Shallow Shore	2008-06-24 11:25:00	Coho Salmon	39	0.4
Kwethluk	Main channel	Athens Shallow Shore	2008-06-24 11:25:00	Coho Salmon	37	0.3
Kwethluk	Main channel	Athens Shallow Shore	2008-06-24 11:25:00	Coho Salmon	38	0.7
Kwethluk	Main channel	Athens Shallow Shore	2008-06-24 11:25:00	Coho Salmon	38	0.6
Kwethluk	Main channel	Athens Shallow Shore	2008-06-24 11:25:00	Coho Salmon	38	0.2
Kwethluk	Main channel	Athens Shallow Shore	2008-06-24 11:25:00	Coho Salmon	38	0.5
Kwethluk	Main channel	Athens Shallow Shore	2008-06-24 11:25:00	Dolly Varden char	36	0.4
Kwethluk	Main channel	Athens Shallow Shore	2008-06-24 11:25:00	Dolly Varden char	36	0.5
Kwethluk	Main channel	Athens Shallow Shore	2008-08-12 10:20:00	Dolly Varden char	41	0.7
Kwethluk	Main channel	Athens Shallow Shore	2008-09-16 10:53:00	Dolly Varden char	64	2
Kwethluk	Main channel	Athens Shallow Shore	2008-06-24 11:25:00	Dolly Varden char	41	0.4
Kwethluk	Main channel	Athens Shallow Shore	2008-06-24 11:25:00	Dolly Varden char	34	0.2
Kwethluk	Main channel	Athens Shallow Shore	2008-06-24 11:25:00	Dolly Varden char	28	0.3
Kwethluk	Main channel	Athens Shallow Shore	2008-08-12 10:20:00	Dolly Varden char	39	0.4
Kwethluk	Main channel	Athens Shallow Shore	2008-06-24 11:25:00	Dolly Varden char	75	3.7
Kwethluk	Main channel	Athens Shallow Shore	2008-08-12 10:20:00	Sculpin, unspeciated	41	0.7
Kwethluk	Main channel	Athens Shallow Shore	2008-08-12 10:20:00	Sculpin, unspeciated	16	0.1
Kwethluk	Main channel	Athens Shallow Shore	2008-08-12 10:20:00	Sculpin, unspeciated	40	0.5
Kwethluk	Main channel	Athens Shallow Shore	2008-08-12 10:20:00	Sculpin, unspeciated	15	0.1
Kwethluk	Main channel	Athens Shallow Shore	2008-08-12 10:20:00	Sculpin, unspeciated	15	0.1
Kwethluk	Main channel	Athens Shallow Shore	2008-08-12 10:20:00	Sculpin, unspeciated	15	0.1
Kwethluk	Main channel	Athens Shallow Shore	2008-08-12 10:20:00	Sculpin, unspeciated	13	0.1
Kwethluk	Main channel	Athens Shallow Shore	2008-08-12 10:20:00	Sculpin, unspeciated	14	0.1
Kwethluk	Main channel	Athens Shallow Shore	2008-08-12 10:20:00	Sculpin, unspeciated	14	0.1
Kwethluk	Main channel	Athens Shallow Shore	2008-08-12 10:20:00	Sculpin, unspeciated	15	0.1
Kwethluk	Main channel	Athens Shallow Shore	2008-08-12 10:20:00	Sculpin, unspeciated	16	0.1
Kwethluk	Main channel	Athens Shallow Shore	2008-08-12 10:20:00	Sculpin, unspeciated	16	0.1
Kwethluk	Main channel	Athens Shallow Shore	2008-08-12 10:20:00	Sculpin, unspeciated	16	0.1
Kwethluk	Main channel	Athens Shallow Shore	2008-08-12 10:20:00	Sculpin, unspeciated	17	0.1
Kwethluk	Main channel	Athens Shallow Shore	2008-08-12 10:20:00	Sculpin, unspeciated	13	0.1
Kwethluk	Main channel	Athens Shallow Shore	2008-08-12 10:20:00	Sculpin, unspeciated	14	0.1
Kwethluk	Main channel	Athens Shallow Shore	2008-08-12 10:20:00	Sculpin, unspeciated	16	0.1
Kwethluk	Main channel	Athens Shallow Shore	2008-08-12 10:20:00	Sculpin, unspeciated	13	0.1
Kwethluk	Main channel	Athens Shallow Shore	2008-08-12 10:20:00	Sculpin, unspeciated	15	0.1
Kwethluk	Main channel	Athens Shallow Shore	2008-08-12 10:20:00	Sculpin, unspeciated	14	0.1
Kwethluk	Main channel	Athens Shallow Shore	2008-08-12 10:20:00	Sculpin, unspeciated	16	0.1
Kwethluk	Main channel	Athens Shallow Shore	2008-08-12 10:20:00	Sculpin, unspeciated	16	0.1
Kwethluk	Main channel	Athens Shallow Shore	2008-08-12 10:20:00	Sculpin, unspeciated	19	0.1
Kwethluk	Main channel	Athens Shallow Shore	2008-08-12 10:20:00	Sculpin, unspeciated	16	0.1
Kwethluk	Main channel	Athens Shallow Shore	2008-08-12 10:20:00	Sculpin, unspeciated	12	0.1
Kwethluk	Main channel	Athens Shallow Shore	2008-08-12 10:20:00	Sculpin, unspeciated	16	0.1
Kwethluk	Main channel	Athens Shallow Shore	2008-08-12 10:20:00	Sculpin, unspeciated	16	0.1
Kwethluk	Main channel	Athens Shallow Shore	2008-08-12 10:20:00	Sculpin, unspeciated	14	0.1
Kwethluk	Main channel	Athens Shallow Shore	2008-08-12 10:20:00	Sculpin, unspeciated	15	0.1
Kwethluk	Main channel	Athens Shallow Shore	2008-08-12 10:20:00	Sculpin, unspeciated	16	0.1
Kwethluk	Main channel	Athens Shallow Shore	2008-08-12 10:20:00	Sculpin, unspeciated	14	0.1
Kwethluk	Main channel	Athens Shallow Shore	2008-08-12 10:20:00	Sculpin, unspeciated	16	0.1
Kwethluk	Main channel	Athens Shallow Shore	2008-08-12 10:20:00	Sculpin, unspeciated	14	0.1
Kwethluk	Main channel	Athens Shallow Shore	2008-08-12 10:20:00	Sculpin, unspeciated	14	0.1
Kwethluk	Main channel	Athens Shallow Shore	2008-08-12 10:20:00	Sculpin, unspeciated	15	0.1
Kwethluk	Main channel	Athens Shallow Shore	2008-08-12 10:20:00	Sculpin, unspeciated	17	0.1
Kwethluk	Main channel	Athens Shallow Shore	2008-08-12 10:20:00	Sculpin, unspeciated	16	0.1
Kwethluk	Main channel	Athens Shallow Shore	2008-08-12 10:20:00	Sculpin, unspeciated	16	0.1
Kwethluk	Main channel	Athens Shallow Shore	2008-08-12 10:20:00	Sculpin, unspeciated	19	0.1
Kwethluk	Main channel	Athens Shallow Shore	2008-08-12 10:20:00	Sculpin, unspeciated	15	0.1
Kwethluk	Main channel	Athens Shallow Shore	2008-08-12 10:20:00	Sculpin, unspeciated	16	0.1
Kwethluk	Main channel	Athens Shallow Shore	2008-08-12 10:20:00	Sculpin, unspeciated	15	0.1
Kwethluk	Main channel	Athens Shallow Shore	2008-08-12 10:20:00	Sculpin, unspeciated	34	0.3
Kwethluk	Main channel	Athens Shallow Shore	2008-08-12 10:20:00	Sculpin, unspeciated	12	0.1
Kwethluk	Main channel	Athens Shallow Shore	2008-08-12 10:20:00	Sculpin, unspeciated	14	0.1
Kwethluk	Main channel	Athens Shallow Shore	2008-08-12 10:20:00	Sculpin, unspeciated	14	0.1
Kwethluk	Main channel	Athens Shallow Shore	2008-08-12 10:20:00	Sculpin, unspeciated	17	0.1
Kwethluk	Main channel	Athens Shallow Shore	2008-08-12 10:20:00	Sculpin, unspeciated	16	0.1
Kwethluk	Main channel	Athens Shallow Shore	2008-08-12 10:20:00	Sculpin, unspeciated	16	0.1
Kwethluk	Main channel	Athens Shallow Shore	2008-08-12 10:20:00	Sculpin, unspeciated	11	0.1
Kwethluk	Main channel	Athens Shallow Shore	2008-08-12 10:20:00	Sculpin, unspeciated	11	0.1
Kwethluk	Main channel	Athens Shallow Shore	2008-08-12 10:20:00	Sculpin, unspeciated	11	0.1
Kwethluk	Main channel	Athens Shallow Shore	2008-08-12 10:20:00	Sculpin, unspeciated	14	0.1
Kwethluk	Main channel	Athens Shallow Shore	2008-08-12 10:20:00	Sculpin, unspeciated	17	0.1
Kwethluk	Main channel	Athens Shallow Shore	2008-08-12 10:20:00	Sculpin, unspeciated	34	0.3
Kwethluk	Main channel	Athens Shallow Shore	2008-08-12 10:20:00	Sculpin, unspeciated	16	0.1
Kwethluk	Main channel	Athens Shallow Shore	2008-08-12 10:20:00	Sculpin, unspeciated	12	0.1
Kwethluk	Main channel	Athens Shallow Shore	2008-08-12 10:20:00	Sculpin, unspeciated	13	0.1
Kwethluk	Main channel	Athens Shallow Shore	2008-08-12 10:20:00	Sculpin, unspeciated	16	0.1
Kwethluk	Main channel	Athens Shallow Shore	2008-08-12 10:20:00	Sculpin, unspeciated	14	0.1
Kwethluk	Main channel	Athens Shallow Shore	2008-08-12 10:20:00	Sculpin, unspeciated	15	0.1
Kwethluk	Main channel	Athens Shallow Shore	2008-08-12 10:20:00	Sculpin, unspeciated	15	0.1
Kwethluk	Main channel	Athens Shallow Shore	2008-08-12 10:20:00	Sculpin, unspeciated	13	0.1
Kwethluk	Main channel	Athens Shallow Shore	2008-08-12 10:20:00	Sculpin, unspeciated	12	0.1
Kwethluk	Main channel	Athens Shallow Shore	2008-08-12 10:20:00	Sculpin, unspeciated	16	0.1
Kwethluk	Main channel	Athens Shallow Shore	2008-08-12 10:20:00	Sculpin, unspeciated	13	0.1
Kwethluk	Main channel	Athens Shallow Shore	2008-08-12 10:20:00	Sculpin, unspeciated	14	0.1
Kwethluk	Main channel	Athens Shallow Shore	2008-08-12 10:20:00	Sculpin, unspeciated	14	0.1
Kwethluk	Main channel	Athens Shallow Shore	2008-08-12 10:20:00	Sculpin, unspeciated	13	0.1
Kwethluk	Main channel	Athens Shallow Shore	2008-08-12 10:20:00	Sculpin, unspeciated	14	0.1
Kwethluk	Main channel	Athens Shallow Shore	2008-08-12 10:20:00	Sculpin, unspeciated	42	0.4
Kwethluk	Main channel	Athens Shallow Shore	2008-08-12 10:20:00	Sculpin, unspeciated	16	0.1
Kwethluk	Main channel	Athens Shallow Shore	2008-08-12 10:20:00	Sculpin, unspeciated	15	0.1
Kwethluk	Main channel	Athens Shallow Shore	2008-08-12 10:20:00	Sculpin, unspeciated	16	0.1
Kwethluk	Main channel	Athens Shallow Shore	2008-08-12 10:20:00	Sculpin, unspeciated	13	0.1
Kwethluk	Main channel	Athens Shallow Shore	2008-08-12 10:20:00	Sculpin, unspeciated	12	0.1
Kwethluk	Main channel	Athens Shallow Shore	2008-08-12 10:20:00	Sculpin, unspeciated	14	0.1
Kwethluk	Main channel	Athens Shallow Shore	2008-08-12 10:20:00	Sculpin, unspeciated	56	1.4
Kwethluk	Main channel	Athens Shallow Shore	2008-08-12 10:20:00	Sculpin, unspeciated	16	0.1
Kwethluk	Main channel	Athens Shallow Shore	2008-08-12 10:20:00	Sculpin, unspeciated	13	0.1
Kwethluk	Main channel	Athens Shallow Shore	2008-08-12 10:20:00	Sculpin, unspeciated	52	1.4
Kwethluk	Main channel	Athens Shallow Shore	2008-08-12 10:20:00	Sculpin, unspeciated	14	0.1
Kwethluk	Main channel	Athens Shallow Shore	2008-08-12 10:20:00	Sculpin, unspeciated	13	0.1
Kwethluk	Main channel	Athens Shallow Shore	2008-08-12 10:20:00	Sculpin, unspeciated	16	0.1
Kwethluk	Main channel	Athens Shallow Shore	2008-08-12 10:20:00	Sculpin, unspeciated	16	0.1
Kwethluk	Main channel	Athens Shallow Shore	2008-08-12 10:20:00	Sculpin, unspeciated	16	0.1
Kwethluk	Main channel	Athens Shallow Shore	2008-08-12 10:20:00	Sculpin, unspeciated	12	0.1
Kwethluk	Main channel	Athens Shallow Shore	2008-08-12 10:20:00	Sculpin, unspeciated	13	0.1
Kwethluk	Main channel	Athens Shallow Shore	2008-08-12 10:20:00	Sculpin, unspeciated	15	0.1
Kwethluk	Main channel	Athens Shallow Shore	2008-08-12 10:20:00	Sculpin, unspeciated	13	0.1
Kwethluk	Main channel	Athens Shallow Shore	2008-08-12 10:20:00	Sculpin, unspeciated	16	0.1
Kwethluk	Main channel	Athens Shallow Shore	2008-08-12 10:20:00	Sculpin, unspeciated	16	0.1
Kwethluk	Main channel	Athens Shallow Shore	2008-08-12 10:20:00	Sculpin, unspeciated	18	0.1
Kwethluk	Main channel	Athens Shallow Shore	2008-08-12 10:20:00	Sculpin, unspeciated	16	0.1
Kwethluk	Main channel	Athens Shallow Shore	2008-08-12 10:20:00	Sculpin, unspeciated	16	0.1
Kwethluk	Main channel	Athens Shallow Shore	2008-08-12 10:20:00	Sculpin, unspeciated	17	0.1
Kwethluk	Main channel	Athens Shallow Shore	2008-08-12 10:20:00	Sculpin, unspeciated	17	0.1
Kwethluk	Main channel	Athens Shallow Shore	2008-08-12 10:20:00	Sculpin, unspeciated	16	0.1
Kwethluk	Main channel	Athens Shallow Shore	2008-08-12 10:20:00	Sculpin, unspeciated	16	0.1
Kwethluk	Main channel	Athens Shallow Shore	2008-08-12 10:20:00	Sculpin, unspeciated	16	0.1
Kwethluk	Main channel	Athens Shallow Shore	2008-08-12 10:20:00	Sculpin, unspeciated	14	0.1
Kwethluk	Main channel	Athens Shallow Shore	2008-08-12 10:20:00	Sculpin, unspeciated	14	0.1
Kwethluk	Main channel	Athens Shallow Shore	2008-08-12 10:20:00	Sculpin, unspeciated	55	1.4
Kwethluk	Main channel	Athens Shallow Shore	2008-08-12 10:20:00	Sculpin, unspeciated	16	0.1
Kwethluk	Main channel	Athens Shallow Shore	2008-08-12 10:20:00	Sculpin, unspeciated	39	0.6
Kwethluk	Main channel	Athens Shallow Shore	2008-08-12 10:20:00	Sculpin, unspeciated	36	0.6
Kwethluk	Main channel	Athens Shallow Shore	2008-09-16 10:53:00	Sculpin, unspeciated	19	0.1
Kwethluk	Main channel	Athens Shallow Shore	2008-09-16 10:53:00	Sculpin, unspeciated	23	0.1
Kwethluk	Main channel	Athens Shallow Shore	2008-09-16 10:53:00	Sculpin, unspeciated	21	0.1
Kwethluk	Main channel	Athens Shallow Shore	2008-09-16 10:53:00	Sculpin, unspeciated	21	0.1
Kwethluk	Main channel	Athens Shallow Shore	2008-09-16 10:53:00	Sculpin, unspeciated	20	0.1
Kwethluk	Main channel	Athens Shallow Shore	2008-09-16 10:53:00	Sculpin, unspeciated	21	0.1
Kwethluk	Main channel	Athens Shallow Shore	2008-09-16 10:53:00	Sculpin, unspeciated	21	0.1
Kwethluk	Main channel	Athens Shallow Shore	2008-06-24 11:25:00	Slimy sculpin	24	0.2
Kwethluk	Main channel	Athens Shallow Shore	2008-06-24 11:25:00	Slimy sculpin	22	0.1
Kwethluk	Main channel	Athens Shallow Shore	2008-06-24 11:25:00	Slimy sculpin	24	0.1
Kwethluk	Main channel	Athens Shallow Shore	2008-06-24 11:25:00	Slimy sculpin	25	0.2
Kwethluk	Main channel	Athens Shallow Shore	2008-06-24 11:25:00	Slimy sculpin	24	0.1
Kwethluk	Main channel	Athens Shallow Shore	2008-06-24 11:25:00	Slimy sculpin	41	0.7
Kwethluk	Main channel	Athens Shallow Shore	2008-06-24 11:25:00	Slimy sculpin	24	0.1
Kwethluk	Main channel	Athens Shallow Shore	2008-06-24 11:25:00	Slimy sculpin	26	0.1
Kwethluk	Main channel	Athens Shallow Shore	2008-06-24 11:25:00	Slimy sculpin	27	0.3
Kwethluk	Main channel	Athens Shallow Shore	2008-06-24 11:25:00	Slimy sculpin	24	0.1
Kwethluk	Main channel	Athens Shallow Shore	2008-06-24 11:25:00	Slimy sculpin	37	0.2
Kwethluk	Main channel	Athens Shallow Shore	2008-06-24 11:25:00	Slimy sculpin	30	0.1
Kwethluk	Main channel	Athens Shallow Shore	2008-06-24 11:25:00	Slimy sculpin	21	0.1
Kwethluk	Main channel	Athens Shallow Shore	2008-06-24 11:25:00	Slimy sculpin	24	0.1
Kwethluk	Main channel	Athens Shallow Shore	2008-06-24 11:25:00	Slimy sculpin	24	0.1
Kwethluk	Main channel	Athens Shallow Shore	2008-06-24 11:25:00	Slimy sculpin	24	1
Kwethluk	Main channel	Athens Shallow Shore	2008-06-24 11:25:00	Slimy sculpin	39	0.6
Kwethluk	Main channel	Athens Shallow Shore	2008-06-24 11:25:00	Slimy sculpin	24	0.1
Kwethluk	Main channel	Athens Shallow Shore	2008-06-24 11:25:00	Slimy sculpin	56	1.4
Kwethluk	Main channel	Athens Shallow Shore	2008-06-24 11:25:00	Slimy sculpin	40	0.6
Kwethluk	Main channel	Athens Shallow Shore	2008-06-24 11:25:00	Slimy sculpin	48	0.7
Kwethluk	Main channel	Athens Shallow Shore	2008-06-24 11:25:00	Slimy sculpin	35	0.3
Kwethluk	Main channel	Athens Shallow Shore	2008-06-24 11:25:00	Slimy sculpin	24	0.1
Kwethluk	Main channel	Athens Shallow Shore	2008-06-24 11:25:00	Slimy sculpin	24	0.1
Kwethluk	Main channel	Athens Shallow Shore	2008-06-24 11:25:00	Slimy sculpin	21	0.1
Kwethluk	Main channel	Athens Shallow Shore	2008-06-24 11:25:00	Slimy sculpin	24	0.1
Kwethluk	Main channel	Athens Shallow Shore	2008-06-24 11:25:00	Slimy sculpin	22	0.1
Kwethluk	Main channel	Athens Shallow Shore	2008-06-24 11:25:00	Slimy sculpin	24	0.1
Kwethluk	Main channel	Athens Shallow Shore	2008-06-24 11:25:00	Slimy sculpin	36	0.3
Kwethluk	Main channel	Athens Shallow Shore	2008-06-24 11:25:00	Slimy sculpin	26	0.1
Kwethluk	Main channel	Athens Shallow Shore	2008-06-24 11:25:00	Slimy sculpin	24	0.1
Kwethluk	Main channel	Athens Shallow Shore	2008-06-24 11:25:00	Slimy sculpin	24	0.1
Kwethluk	Main channel	Athens Shallow Shore	2008-06-24 11:25:00	Slimy sculpin	23	0.1
Kwethluk	Main channel	Athens Shallow Shore	2008-06-24 11:25:00	Slimy sculpin	23	0.1
Kwethluk	Main channel	Athens Shallow Shore	2008-06-24 11:25:00	Slimy sculpin	30	0.2
Kwethluk	Main channel	Athens Shallow Shore	2008-06-24 11:25:00	Slimy sculpin	35	0.2
Kwethluk	Main channel	Athens Shallow Shore	2008-06-24 11:25:00	Slimy sculpin	29	0.2
Kwethluk	Main channel	Athens Shallow Shore	2008-06-24 11:25:00	Slimy sculpin	21	0.1
Kwethluk	Main channel	Athens Shallow Shore	2008-06-24 11:25:00	Slimy sculpin	31	0.5
Kwethluk	Main channel	Athens Shallow Shore	2008-06-24 11:25:00	Slimy sculpin	30	0.2
Kwethluk	Main channel	Athens Shallow Shore	2008-06-24 11:25:00	Slimy sculpin	29	0.2
Kwethluk	Main channel	Athens Shallow Shore	2008-06-24 11:25:00	Slimy sculpin	24	0.1
Kwethluk	Main channel	Athens Shallow Shore	2008-06-24 11:25:00	Slimy sculpin	24	0.1
Kwethluk	Main channel	Athens Shallow Shore	2008-06-24 11:25:00	Slimy sculpin	25	0.1
Kwethluk	Main channel	Athens Shallow Shore	2008-06-24 11:25:00	Slimy sculpin	25	0.1
Kwethluk	Main channel	Athens Shallow Shore	2008-06-24 11:25:00	Slimy sculpin	20	0.1
Kwethluk	Main channel	Athens Shallow Shore	2008-06-24 11:25:00	Slimy sculpin	22	0.1
Kwethluk	Main channel	Athens Shallow Shore	2008-06-24 11:25:00	Slimy sculpin	20	0.1
Kwethluk	Main channel	Athens Shallow Shore	2008-06-24 11:25:00	Slimy sculpin	28	0.2
Kwethluk	Main channel	Athens Shallow Shore	2008-06-24 11:25:00	Slimy sculpin	52	1.3
Kwethluk	Main channel	Athens Shallow Shore	2008-06-24 11:25:00	Slimy sculpin	26	0.1
Kwethluk	Main channel	Athens Shallow Shore	2008-06-24 11:25:00	Slimy sculpin	27	0.1
Kwethluk	Main channel	Athens Shallow Shore	2008-06-24 11:25:00	Slimy sculpin	42	0.9
Kwethluk	Main channel	Athens Shallow Shore	2008-06-24 11:25:00	Slimy sculpin	40	0.5
Kwethluk	Main channel	Athens Shallow Shore	2008-06-24 11:25:00	Slimy sculpin	41	0.8
Kwethluk	Main channel	Athens Shallow Shore	2008-06-24 11:25:00	Slimy sculpin	49	1.3
Kwethluk	Main channel	Athens Shallow Shore	2008-06-24 11:25:00	Slimy sculpin	30	0.2
Kwethluk	Main channel	Athens Shallow Shore	2008-06-24 11:25:00	Slimy sculpin	40	0.6
Kwethluk	Main channel	Athens Shallow Shore	2008-06-24 11:25:00	Slimy sculpin	36	0.5
Kwethluk	Main channel	Athens Shallow Shore	2008-06-24 11:25:00	Slimy sculpin	35	0.2
Kwethluk	Main channel	Athens Shallow Shore	2008-06-24 11:25:00	Slimy sculpin	40	0.7
Kwethluk	Main channel	Athens Shallow Shore	2008-06-24 11:25:00	Slimy sculpin	36	0.4
Kwethluk	Main channel	Athens Shallow Shore	2008-06-24 11:25:00	Slimy sculpin	22	0.1
Kwethluk	Main channel	Athens Shallow Shore	2008-06-24 11:25:00	Slimy sculpin	29	0.2
Kwethluk	Main channel	Athens Shallow Shore	2008-06-24 11:25:00	Slimy sculpin	25	0.1
Kwethluk	Main channel	Athens Shallow Shore	2008-06-24 11:25:00	Slimy sculpin	24	0.2
Kwethluk	Main channel	Athens Shallow Shore	2008-06-24 11:25:00	Slimy sculpin	24	0.1
Kwethluk	Main channel	Athens Shallow Shore	2008-06-24 11:25:00	Slimy sculpin	33	0.5
Kwethluk	Main channel	Athens Shallow Shore	2008-06-24 11:25:00	Slimy sculpin	27	0.7
Kwethluk	Main channel	Athens Shallow Shore	2008-06-24 11:25:00	Slimy sculpin	24	0.4
Kwethluk	Main channel	Athens Shallow Shore	2008-06-24 11:25:00	Slimy sculpin	24	0.1
Kwethluk	Main channel	Athens Shallow Shore	2008-06-24 11:25:00	Slimy sculpin	35	0.5
Kwethluk	Main channel	Athens Shallow Shore	2008-06-24 11:25:00	Slimy sculpin	24	0.1
Kwethluk	Main channel	Athens Shallow Shore	2008-06-24 11:25:00	Slimy sculpin	29	0.2
Kwethluk	Main channel	Athens Shallow Shore	2008-06-24 11:25:00	Slimy sculpin	58	1.4
Kwethluk	Main channel	Athens Shallow Shore	2008-06-24 11:25:00	Slimy sculpin	59	1.7
Kwethluk	Main channel	Athens Shallow Shore	2008-06-24 11:25:00	Slimy sculpin	59	1.9
Kwethluk	Main channel	Athens Shallow Shore	2008-06-24 11:25:00	Slimy sculpin	61	2.6
Kwethluk	Main channel	Athens Shallow Shore	2008-06-24 11:25:00	Slimy sculpin	51	1.2
Kwethluk	Main channel	Athens Shallow Shore	2008-06-24 11:25:00	Slimy sculpin	62	2.3
Kwethluk	Main channel	Athens Shallow Shore	2008-06-24 11:25:00	Slimy sculpin	48	1.1
Kwethluk	Main channel	Athens Shallow Shore	2008-06-24 11:25:00	Slimy sculpin	35	0.3
Kwethluk	Main channel	Athens Shallow Shore	2008-06-24 11:25:00	Slimy sculpin	47	1.2
Kwethluk	Main channel	Athens Shallow Shore	2008-06-24 11:25:00	Slimy sculpin	43	0.6
Kwethluk	Main channel	Athens Shallow Shore	2008-06-24 11:25:00	Slimy sculpin	39	0.6
Kwethluk	Main channel	Athens Shallow Shore	2008-06-24 11:25:00	Slimy sculpin	31	0.3
Kwethluk	Main channel	Athens Shallow Shore	2008-06-24 11:25:00	Slimy sculpin	22	0.1
Kwethluk	Main channel	Athens Shallow Shore	2008-06-24 11:25:00	Slimy sculpin	41	0.5
Kwethluk	Main channel	Athens Shallow Shore	2008-06-24 11:25:00	Slimy sculpin	38	0.5
Kwethluk	Main channel	Athens Shallow Shore	2008-06-24 11:25:00	Slimy sculpin	40	1.1
Kwethluk	Main channel	Athens Shallow Shore	2008-06-24 11:25:00	Slimy sculpin	26	0.2
Kwethluk	Main channel	Athens Shallow Shore	2008-06-24 11:25:00	Slimy sculpin	22	0.1
Kwethluk	Main channel	Athens Shallow Shore	2008-06-24 11:25:00	Slimy sculpin	24	0.1
Kwethluk	Main channel	Athens Shallow Shore	2008-06-24 11:25:00	Slimy sculpin	35	0.5
Kwethluk	Main channel	Athens Shallow Shore	2008-06-24 11:25:00	Slimy sculpin	37	0.8
Kwethluk	Main channel	Athens Shallow Shore	2008-06-24 11:25:00	Slimy sculpin	24	0.1
Kwethluk	Main channel	Athens Shallow Shore	2008-06-24 11:25:00	Slimy sculpin	30	0.3
Kwethluk	Main channel	Athens Shallow Shore	2008-06-24 11:25:00	Slimy sculpin	38	0.6
Kwethluk	Main channel	Athens Shallow Shore	2008-06-24 11:25:00	Slimy sculpin	22	0.1
Kwethluk	Main channel	Athens Shallow Shore	2008-06-24 11:25:00	Slimy sculpin	24	0.1
Kwethluk	Main channel	Athens Shallow Shore	2008-08-12 10:20:00	Sockeye salmon	59	1.5
Kwethluk	Main channel	Athens Shallow Shore	2008-08-12 10:20:00	Steelhead-rainbow	32	0.2
Kwethluk	Main channel	Athens Shallow Shore	2008-08-12 10:20:00	Steelhead-rainbow	27	0.2
Kwethluk	Main channel	Athens Shallow Shore	2008-08-12 10:20:00	Steelhead-rainbow	34	0.2
Kwethluk	Main channel	Athens Shallow Shore	2008-08-12 10:20:00	Steelhead-rainbow	34	0.2
Kwethluk	Main channel	Athens Shallow Shore	2008-08-12 10:20:00	Steelhead-rainbow	32	0.1
Kwethluk	Main channel	Athens Shallow Shore	2008-08-12 10:20:00	Steelhead-rainbow	32	0.3
Kwethluk	Main channel	Athens Shallow Shore	2008-08-12 10:20:00	Steelhead-rainbow	29	0.2
Kwethluk	Main channel	Athens Shallow Shore	2008-08-12 10:20:00	Steelhead-rainbow	34	0.4
Kwethluk	Main channel	Athens Shallow Shore	2008-08-12 10:20:00	Steelhead-rainbow	36	0.3
Kwethluk	Main channel	Athens Shallow Shore	2008-08-12 10:20:00	Steelhead-rainbow	32	0.2
Kwethluk	Main channel	Athens Shallow Shore	2008-08-12 10:20:00	Steelhead-rainbow	29	0.2
Kwethluk	Main channel	Athens Shallow Shore	2008-08-12 10:20:00	Steelhead-rainbow	23	0.1
Kwethluk	Main channel	Athens Shallow Shore	2008-08-12 10:20:00	Steelhead-rainbow	31	0.2
Kwethluk	Main channel	Athens Shallow Shore	2008-08-12 10:20:00	Steelhead-rainbow	30	0.3
Kwethluk	Main channel	Athens Shallow Shore	2008-08-12 10:20:00	Steelhead-rainbow	28	0.2
Kwethluk	Main channel	Athens Shallow Shore	2008-08-12 10:20:00	Steelhead-rainbow	32	0.3
Kwethluk	Main channel	Athens Shallow Shore	2008-08-12 10:20:00	Steelhead-rainbow	34	0.3
Kwethluk	Main channel	Athens Shallow Shore	2008-08-12 10:20:00	Steelhead-rainbow	29	0.1
Kwethluk	Main channel	Athens Shallow Shore	2008-08-12 10:20:00	Steelhead-rainbow	31	0.2
Kwethluk	Main channel	Athens Shallow Shore	2008-08-12 10:20:00	Steelhead-rainbow	34	0.3
Kwethluk	Main channel	Athens Shallow Shore	2008-08-12 10:20:00	Steelhead-rainbow	28	0.1
Kwethluk	Main channel	Athens Shallow Shore	2008-08-12 10:20:00	Steelhead-rainbow	34	0.2
Kwethluk	Main channel	Athens Shallow Shore	2008-08-12 10:20:00	Steelhead-rainbow	31	0.3
Kwethluk	Main channel	Athens Shallow Shore	2008-08-12 10:20:00	Steelhead-rainbow	36	0.4
Kwethluk	Main channel	Athens Shallow Shore	2008-08-12 10:20:00	Steelhead-rainbow	29	0.2
Kwethluk	Main channel	Athens Shallow Shore	2008-08-12 10:20:00	Steelhead-rainbow	36	0.3
Kwethluk	Main channel	Athens Shallow Shore	2008-08-12 10:20:00	Steelhead-rainbow	30	0.2
Kwethluk	Main channel	Athens Shallow Shore	2008-08-12 10:20:00	Steelhead-rainbow	38	0.2
Kwethluk	Main channel	Athens Shallow Shore	2008-08-12 10:20:00	Steelhead-rainbow	31	0.2
Kwethluk	Main channel	Athens Shallow Shore	2008-08-12 10:20:00	Steelhead-rainbow	30	0.5
Kwethluk	Main channel	Athens Shallow Shore	2008-08-12 10:20:00	Steelhead-rainbow	31	0.2
Kwethluk	Main channel	Athens Shallow Shore	2008-08-12 10:20:00	Steelhead-rainbow	30	0.2
Kwethluk	Main channel	Athens Shallow Shore	2008-08-12 10:20:00	Steelhead-rainbow	32	0.2
Kwethluk	Main channel	Athens Shallow Shore	2008-08-12 10:20:00	Steelhead-rainbow	33	0.2
Kwethluk	Main channel	Athens Shallow Shore	2008-08-12 10:20:00	Steelhead-rainbow	30	0.2
Kwethluk	Main channel	Athens Shallow Shore	2008-08-12 10:20:00	Steelhead-rainbow	34	0.5
Kwethluk	Main channel	Athens Shallow Shore	2008-08-12 10:20:00	Steelhead-rainbow	32	0.3
Kwethluk	Main channel	Athens Shallow Shore	2008-08-12 10:20:00	Steelhead-rainbow	26	0.1
Kwethluk	Main channel	Athens Shallow Shore	2008-08-12 10:20:00	Steelhead-rainbow	30	0.1
Kwethluk	Main channel	Athens Shallow Shore	2008-08-12 10:20:00	Steelhead-rainbow	31	0.3
Kwethluk	Main channel	Athens Shallow Shore	2008-08-12 10:20:00	Steelhead-rainbow	31	0.2
Kwethluk	Main channel	Athens Shallow Shore	2008-08-12 10:20:00	Steelhead-rainbow	29	0.1
Kwethluk	Main channel	Athens Shallow Shore	2008-08-12 10:20:00	Steelhead-rainbow	34	0.3
Kwethluk	Main channel	Athens Shallow Shore	2008-08-12 10:20:00	Steelhead-rainbow	27	0.1
Kwethluk	Main channel	Athens Shallow Shore	2008-08-12 10:20:00	Steelhead-rainbow	35	0.4
Kwethluk	Main channel	Athens Shallow Shore	2008-08-12 10:20:00	Steelhead-rainbow	28	0.1
Kwethluk	Main channel	Athens Shallow Shore	2008-08-12 10:20:00	Steelhead-rainbow	31	0.2
Kwethluk	Main channel	Athens Shallow Shore	2008-08-12 10:20:00	Steelhead-rainbow	28	0.1
Kwethluk	Main channel	Athens Shallow Shore	2008-08-12 10:20:00	Steelhead-rainbow	30	0.1
Kwethluk	Main channel	Athens Shallow Shore	2008-08-12 10:20:00	Steelhead-rainbow	33	0.3
Kwethluk	Main channel	Athens Shallow Shore	2008-08-12 10:20:00	Steelhead-rainbow	29	0.2
Kwethluk	Main channel	Athens Shallow Shore	2008-08-12 10:20:00	Steelhead-rainbow	27	0.1
Kwethluk	Main channel	Athens Shallow Shore	2008-08-12 10:20:00	Steelhead-rainbow	29	0.2
Kwethluk	Main channel	Athens Shallow Shore	2008-08-12 10:20:00	Steelhead-rainbow	39	0.4
Kwethluk	Main channel	Athens Shallow Shore	2008-08-12 10:20:00	Steelhead-rainbow	29	0.1
Kwethluk	Main channel	Athens Shallow Shore	2008-08-12 10:20:00	Steelhead-rainbow	29	0.2
Kwethluk	Main channel	Athens Shallow Shore	2008-08-12 10:20:00	Steelhead-rainbow	29	0.1
Kwethluk	Main channel	Athens Shallow Shore	2008-08-12 10:20:00	Steelhead-rainbow	34	0.2
Kwethluk	Main channel	Athens Shallow Shore	2008-08-12 10:20:00	Steelhead-rainbow	29	0.2
Kwethluk	Main channel	Athens Shallow Shore	2008-09-16 10:53:00	Steelhead-rainbow	37	0.3
Kwethluk	Main channel	Athens Shallow Shore	2008-09-16 10:53:00	Steelhead-rainbow	38	0.5
Kwethluk	Main channel	Athens Shallow Shore	2008-09-16 10:53:00	Steelhead-rainbow	43	0.9
Kwethluk	Main channel	Athens Shallow Shore	2008-09-16 10:53:00	Steelhead-rainbow	49	1.3
Kwethluk	Main channel	Athens Shallow Shore	2008-09-16 10:53:00	Steelhead-rainbow	34	0.4
Kwethluk	Main channel	Athens Shallow Shore	2008-09-16 10:53:00	Steelhead-rainbow	49	0.9
Kwethluk	Main channel	Athens Shallow Shore	2008-09-16 10:53:00	Steelhead-rainbow	49	1.1
Kwethluk	Main channel	Athens Shallow Shore	2008-09-16 10:53:00	Steelhead-rainbow	48	0.8
Kwethluk	Main channel	Athens Shallow Shore	2008-09-16 10:53:00	Steelhead-rainbow	41	0.5
Kwethluk	Main channel	Athens Shallow Shore	2008-09-16 10:53:00	Steelhead-rainbow	43	0.7
Kwethluk	Main channel	Athens Shallow Shore	2008-09-16 10:53:00	Steelhead-rainbow	26	0.4
Kwethluk	Main channel	Athens Shallow Shore	2008-09-16 10:53:00	Steelhead-rainbow	34	0.3
Kwethluk	Main channel	Athens Shallow Shore	2008-09-16 10:53:00	Steelhead-rainbow	45	0.8
Kwethluk	Main channel	Athens Shallow Shore	2008-09-16 10:53:00	Steelhead-rainbow	41	0.6
Kwethluk	Main channel	Athens Shallow Shore	2008-09-16 10:53:00	Steelhead-rainbow	36	0.4
Kwethluk	Main channel	Athens Shallow Shore	2008-09-16 10:53:00	Steelhead-rainbow	38	0.4
Kwethluk	Main channel	Athens Shallow Shore	2008-09-16 10:53:00	Steelhead-rainbow	37	0.5
Kwethluk	Main channel	Athens Shallow Shore	2008-09-16 10:53:00	Steelhead-rainbow	43	0.6
Kwethluk	Main channel	Athens Shallow Shore	2008-09-16 10:53:00	Steelhead-rainbow	43	0.7
Kwethluk	Main channel	Athens Shallow Shore	2008-09-16 10:53:00	Steelhead-rainbow	46	1
Kwethluk	Main channel	Athens Shallow Shore	2008-09-16 10:53:00	Steelhead-rainbow	36	0.5
Kwethluk	Main channel	Athens Shallow Shore	2008-09-16 10:53:00	Steelhead-rainbow	45	1
Kwethluk	Main channel	Athens Shallow Shore	2008-09-16 10:53:00	Steelhead-rainbow	44	0.8
Kwethluk	Main channel	Athens Shallow Shore	2008-09-16 10:53:00	Steelhead-rainbow	44	0.7
Kwethluk	Main channel	Athens Shallow Shore	2008-09-16 10:53:00	Steelhead-rainbow	43	0.7
Kwethluk	Main channel	Athens Shallow Shore	2008-09-16 10:53:00	Steelhead-rainbow	36	0.3
Kwethluk	Main channel	Athens Shallow Shore	2008-09-16 10:53:00	Steelhead-rainbow	40	0.7
Kwethluk	Main channel	Athens Shallow Shore	2008-09-16 10:53:00	Steelhead-rainbow	45	1
Kwethluk	Main channel	Backdoor bar	2008-08-10 10:50:00	Arctic lamprey	125	2.4
Kwethluk	Main channel	Backdoor bar	2008-09-14 10:08:00	Arctic lamprey	155	5.7
Kwethluk	Main channel	Backdoor bar	2008-06-22 09:04:00	Chinook salmon	37	0.5
Kwethluk	Main channel	Backdoor bar	2008-06-22 09:04:00	Chinook salmon	38	0.4
Kwethluk	Main channel	Backdoor bar	2008-06-22 09:04:00	Chinook salmon	39	0.6
Kwethluk	Main channel	Backdoor bar	2008-06-22 09:04:00	Chinook salmon	36	0.4
Kwethluk	Main channel	Backdoor bar	2008-06-22 09:04:00	Chinook salmon	39	0.4
Kwethluk	Main channel	Backdoor bar	2008-06-22 09:04:00	Chinook salmon	35	0.5
Kwethluk	Main channel	Backdoor bar	2008-06-22 09:04:00	Chinook salmon	40	0.8
Kwethluk	Main channel	Backdoor bar	2008-06-22 09:04:00	Chinook salmon	43	0.7
Kwethluk	Main channel	Backdoor bar	2008-06-22 09:04:00	Chinook salmon	35	0.3
Kwethluk	Main channel	Backdoor bar	2008-06-22 09:04:00	Chinook salmon	43	0.3
Kwethluk	Main channel	Backdoor bar	2008-06-22 09:04:00	Chinook salmon	37	0.4
Kwethluk	Main channel	Backdoor bar	2008-06-22 09:04:00	Chinook salmon	35	0.2
Kwethluk	Main channel	Backdoor bar	2008-06-22 09:04:00	Chinook salmon	39	0.5
Kwethluk	Main channel	Backdoor bar	2008-06-22 09:04:00	Coho Salmon	37	0.4
Kwethluk	Main channel	Backdoor bar	2008-06-22 09:04:00	Coho Salmon	34	0.1
Kwethluk	Main channel	Backdoor bar	2008-06-22 09:04:00	Coho Salmon	37	0.3
Kwethluk	Main channel	Backdoor bar	2008-06-22 09:04:00	Coho Salmon	40	0.3
Kwethluk	Main channel	Backdoor bar	2008-06-22 09:04:00	Coho Salmon	34	0.3
Kwethluk	Main channel	Backdoor bar	2008-06-22 09:04:00	Coho Salmon	43	0.9
Kwethluk	Main channel	Backdoor bar	2008-06-22 09:04:00	Coho Salmon	35	0.5
Kwethluk	Main channel	Backdoor bar	2008-06-22 09:04:00	Coho Salmon	34	0.2
Kwethluk	Main channel	Backdoor bar	2008-06-22 09:04:00	Coho Salmon	40	0.5
Kwethluk	Main channel	Backdoor bar	2008-06-22 09:04:00	Coho Salmon	38	0.4
Kwethluk	Main channel	Backdoor bar	2008-06-22 09:04:00	Coho Salmon	34	0.3
Kwethluk	Main channel	Backdoor bar	2008-06-22 09:04:00	Coho Salmon	38	0.4
Kwethluk	Main channel	Backdoor bar	2008-06-22 09:04:00	Coho Salmon	35	0.3
Kwethluk	Main channel	Backdoor bar	2008-06-22 09:04:00	Coho Salmon	36	0.3
Kwethluk	Main channel	Backdoor bar	2008-06-22 09:04:00	Coho Salmon	35	0.3
Kwethluk	Main channel	Backdoor bar	2008-06-22 09:04:00	Coho Salmon	36	0.3
Kwethluk	Main channel	Backdoor bar	2008-06-22 09:04:00	Coho Salmon	35	0.4
Kwethluk	Main channel	Backdoor bar	2008-09-14 10:08:00	Coho Salmon	40	0.6
Kwethluk	Main channel	Backdoor bar	2008-06-22 09:04:00	Coho Salmon	37	0.5
Kwethluk	Main channel	Backdoor bar	2008-06-22 09:04:00	Coho Salmon	39	0.5
Kwethluk	Main channel	Backdoor bar	2008-06-22 09:04:00	Coho Salmon	36	0.2
Kwethluk	Main channel	Backdoor bar	2008-06-22 09:04:00	Coho Salmon	34	0.2
Kwethluk	Main channel	Backdoor bar	2008-06-22 09:04:00	Coho Salmon	39	0.3
Kwethluk	Main channel	Backdoor bar	2008-06-22 09:04:00	Coho Salmon	37	0.5
Kwethluk	Main channel	Backdoor bar	2008-06-22 09:04:00	Coho Salmon	32	0.2
Kwethluk	Main channel	Backdoor bar	2008-06-22 09:04:00	Coho Salmon	36	0.3
Kwethluk	Main channel	Backdoor bar	2008-06-22 09:04:00	Coho Salmon	35	0.4
Kwethluk	Main channel	Backdoor bar	2008-06-22 09:04:00	Coho Salmon	37	0.4
Kwethluk	Main channel	Backdoor bar	2008-06-22 09:04:00	Coho Salmon	37	0.3
Kwethluk	Main channel	Backdoor bar	2008-06-22 09:04:00	Coho Salmon	37	0.6
Kwethluk	Main channel	Backdoor bar	2008-06-22 09:04:00	Coho Salmon	40	0.6
Kwethluk	Main channel	Backdoor bar	2008-06-22 09:04:00	Coho Salmon	37	0.4
Kwethluk	Main channel	Backdoor bar	2008-06-22 09:04:00	Coho Salmon	35	0.4
Kwethluk	Main channel	Backdoor bar	2008-06-22 09:04:00	Coho Salmon	33	0.2
Kwethluk	Main channel	Backdoor bar	2008-06-22 09:04:00	Coho Salmon	38	0.4
Kwethluk	Main channel	Backdoor bar	2008-06-22 09:04:00	Coho Salmon	38	0.6
Kwethluk	Main channel	Backdoor bar	2008-06-22 09:04:00	Coho Salmon	42	0.7
Kwethluk	Main channel	Backdoor bar	2008-06-22 09:04:00	Coho Salmon	34	0.2
Kwethluk	Main channel	Backdoor bar	2008-06-22 09:04:00	Coho Salmon	39	0.5
Kwethluk	Main channel	Backdoor bar	2008-06-22 09:04:00	Coho Salmon	35	0.3
Kwethluk	Main channel	Backdoor bar	2008-06-22 09:04:00	Dolly Varden char	33	0.3
Kwethluk	Main channel	Backdoor bar	2008-06-22 09:04:00	Dolly Varden char	29	0.1
Kwethluk	Main channel	Backdoor bar	2008-06-22 09:04:00	Dolly Varden char	29	0.2
Kwethluk	Main channel	Backdoor bar	2008-06-22 09:04:00	Dolly Varden char	32	0.3
Kwethluk	Main channel	Backdoor bar	2008-06-22 09:04:00	Dolly Varden char	34	0.2
Kwethluk	Main channel	Backdoor bar	2008-09-14 10:08:00	Sculpin, unspeciated	36	0.7
Kwethluk	Main channel	Backdoor bar	2008-06-22 09:04:00	Slimy sculpin	24	0.1
Kwethluk	Main channel	Backdoor bar	2008-06-22 09:04:00	Slimy sculpin	24	0.1
Kwethluk	Main channel	Backdoor bar	2008-06-22 09:04:00	Slimy sculpin	23	0.1
Kwethluk	Main channel	Backdoor bar	2008-06-22 09:04:00	Slimy sculpin	20	0.1
Kwethluk	Main channel	Backdoor bar	2008-06-22 09:04:00	Slimy sculpin	70	3.5
Kwethluk	Main channel	Backdoor bar	2008-06-22 09:04:00	Slimy sculpin	34	0.6
Kwethluk	Main channel	Backdoor bar	2008-06-22 09:04:00	Slimy sculpin	25	0.2
Kwethluk	Main channel	Backdoor bar	2008-06-22 09:04:00	Slimy sculpin	26	0.2
Kwethluk	Main channel	Backdoor bar	2008-06-22 09:04:00	Slimy sculpin	20	0.1
Kwethluk	Main channel	Backdoor bar	2008-06-22 09:04:00	Slimy sculpin	25	0.2
Kwethluk	Main channel	Backdoor bar	2008-06-22 09:04:00	Slimy sculpin	30	0.2
Kwethluk	Main channel	Backdoor bar	2008-06-22 09:04:00	Slimy sculpin	26	0.2
Kwethluk	Main channel	Backdoor bar	2008-06-22 09:04:00	Slimy sculpin	85	6.4
Kwethluk	Main channel	Backdoor bar	2008-06-22 09:04:00	Slimy sculpin	73	4.1
Kwethluk	Main channel	Backdoor bar	2008-06-22 09:04:00	Slimy sculpin	25	0.2
Kwethluk	Main channel	Backdoor bar	2008-06-22 09:04:00	Slimy sculpin	22	0.1
Kwethluk	Main channel	Backdoor bar	2008-06-22 09:04:00	Slimy sculpin	25	0.2
Kwethluk	Main channel	Backdoor bar	2008-06-22 09:04:00	Slimy sculpin	26	0.2
Kwethluk	Main channel	Backdoor bar	2008-06-22 09:04:00	Slimy sculpin	20	0.1
Kwethluk	Main channel	Backdoor bar	2008-06-22 09:04:00	Slimy sculpin	21	0.1
Kwethluk	Main channel	Backdoor bar	2008-06-22 09:04:00	Slimy sculpin	21	0.1
Kwethluk	Main channel	Backdoor bar	2008-06-22 09:04:00	Slimy sculpin	20	0.1
Kwethluk	Main channel	Backdoor bar	2008-06-22 09:04:00	Slimy sculpin	21	0.1
Kwethluk	Main channel	Backdoor bar	2008-06-22 09:04:00	Slimy sculpin	22	0.1
Kwethluk	Main channel	Backdoor bar	2008-06-22 09:04:00	Slimy sculpin	22	0.1
Kwethluk	Main channel	Backdoor bar	2008-06-22 09:04:00	Slimy sculpin	28	0.2
Kwethluk	Main channel	Backdoor bar	2008-06-22 09:04:00	Slimy sculpin	20	0.1
Kwethluk	Main channel	Backdoor bar	2008-06-22 09:04:00	Slimy sculpin	20	0.1
Kwethluk	Main channel	Backdoor bar	2008-06-22 09:04:00	Slimy sculpin	25	0.2
Kwethluk	Main channel	Backdoor bar	2008-06-22 09:04:00	Slimy sculpin	24	0.1
Kwethluk	Main channel	Backdoor bar	2008-06-22 09:04:00	Slimy sculpin	22	0.1
Kwethluk	Main channel	Backdoor bar	2008-06-22 09:04:00	Slimy sculpin	26	0.2
Kwethluk	Main channel	Backdoor bar	2008-06-22 09:04:00	Slimy sculpin	21	0.1
Kwethluk	Main channel	Backdoor bar	2008-06-22 09:04:00	Slimy sculpin	33	0.3
Kwethluk	Main channel	Backdoor bar	2008-06-22 09:04:00	Slimy sculpin	23	0.1
Kwethluk	Main channel	Backdoor bar	2008-06-22 09:04:00	Slimy sculpin	26	0.2
Kwethluk	Main channel	Backdoor bar	2008-06-22 09:04:00	Slimy sculpin	25	0.2
Kwethluk	Main channel	Backdoor bar	2008-06-22 09:04:00	Slimy sculpin	27	0.2
Kwethluk	Main channel	Backdoor bar	2008-06-22 09:04:00	Slimy sculpin	27	0.2
Kwethluk	Main channel	Backdoor bar	2008-06-22 09:04:00	Slimy sculpin	24	0.2
Kwethluk	Main channel	Backdoor bar	2008-06-22 09:04:00	Slimy sculpin	25	0.2
Kwethluk	Main channel	Backdoor bar	2008-06-22 09:04:00	Slimy sculpin	18	0.1
Kwethluk	Main channel	Backdoor bar	2008-06-22 09:04:00	Slimy sculpin	25	0.2
Kwethluk	Main channel	Backdoor bar	2008-06-22 09:04:00	Slimy sculpin	23	0.1
Kwethluk	Main channel	Backdoor bar	2008-06-22 09:04:00	Slimy sculpin	22	0.1
Kwethluk	Main channel	Backdoor bar	2008-06-22 09:04:00	Slimy sculpin	21	0.1
Kwethluk	Main channel	Backdoor bar	2008-06-22 09:04:00	Slimy sculpin	20	0.1
Kwethluk	Main channel	Backdoor bar	2008-06-22 09:04:00	Slimy sculpin	25	0.2
Kwethluk	Main channel	Backdoor bar	2008-08-10 10:50:00	Slimy sculpin	31	0.4
Kwethluk	Main channel	Backdoor bar	2008-08-10 10:50:00	Slimy sculpin	31	0.4
Kwethluk	Main channel	Backdoor bar	2008-08-10 10:50:00	Slimy sculpin	27	0.6
Kwethluk	Main channel	Backdoor bar	2008-08-10 10:50:00	Slimy sculpin	26	0.2
Kwethluk	Main channel	Backdoor bar	2008-06-22 09:04:00	Slimy sculpin	23	0.1
Kwethluk	Main channel	Backdoor bar	2008-06-22 09:04:00	Slimy sculpin	19	0.1
Kwethluk	Main channel	Backdoor bar	2008-08-10 10:50:00	Slimy sculpin	38	0.8
Kwethluk	Main channel	Backdoor bar	2008-08-10 10:50:00	Slimy sculpin	33	0.7
Kwethluk	Main channel	Backdoor bar	2008-08-10 10:50:00	Slimy sculpin	29	0.3
Kwethluk	Main channel	Backdoor bar	2008-08-10 10:50:00	Slimy sculpin	39	0.4
Kwethluk	Main channel	Backdoor bar	2008-08-10 10:50:00	Slimy sculpin	37	0.6
Kwethluk	Main channel	Backdoor bar	2008-08-10 10:50:00	Slimy sculpin	30	0.5
Kwethluk	Main channel	Backdoor bar	2008-08-10 10:50:00	Slimy sculpin	33	0.9
Kwethluk	Main channel	Backdoor bar	2008-08-10 10:50:00	Slimy sculpin	34	0.4
Kwethluk	Main channel	Backdoor bar	2008-08-10 10:50:00	Slimy sculpin	31	0.4
Kwethluk	Main channel	Backdoor bar	2008-08-10 10:50:00	Slimy sculpin	61	3.4
Kwethluk	Main channel	Backdoor bar	2008-08-10 10:50:00	Slimy sculpin	31	0.3
Kwethluk	Main channel	Backdoor bar	2008-08-10 10:50:00	Slimy sculpin	33	0.6
Kwethluk	Main channel	Backdoor bar	2008-06-22 09:04:00	Slimy sculpin	20	0.1
Kwethluk	Main channel	Backdoor bar	2008-06-22 09:04:00	Slimy sculpin	22	0.1
Kwethluk	Main channel	Backdoor bar	2008-08-10 10:50:00	Slimy sculpin	85	8.6
Kwethluk	Main channel	Backdoor bar	2008-08-10 10:50:00	Slimy sculpin	24	0.8
Kwethluk	Main channel	Backdoor bar	2008-08-10 10:50:00	Slimy sculpin	75	4.6
Kwethluk	Main channel	Backdoor bar	2008-08-10 10:50:00	Slimy sculpin	60	1.8
Kwethluk	Main channel	Backdoor bar	2008-06-22 09:04:00	Slimy sculpin	22	0.1
Kwethluk	Main channel	Backdoor bar	2008-06-22 09:04:00	Slimy sculpin	20	0.1
Kwethluk	Main channel	Backdoor bar	2008-06-22 09:04:00	Slimy sculpin	60	2
Kwethluk	Main channel	Backdoor bar	2008-06-22 09:04:00	Slimy sculpin	21	0.1
Kwethluk	Main channel	Backdoor bar	2008-06-22 09:04:00	Slimy sculpin	24	0.1
Kwethluk	Main channel	Backdoor bar	2008-06-22 09:04:00	Slimy sculpin	21	0.1
Kwethluk	Main channel	Backdoor bar	2008-06-22 09:04:00	Slimy sculpin	21	0.1
Kwethluk	Main channel	Backdoor bar	2008-06-22 09:04:00	Slimy sculpin	21	0.1
Kwethluk	Main channel	Backdoor bar	2008-06-22 09:04:00	Slimy sculpin	24	0.2
Kwethluk	Main channel	Backdoor bar	2008-06-22 09:04:00	Slimy sculpin	26	0.2
Kwethluk	Main channel	Backdoor bar	2008-06-22 09:04:00	Slimy sculpin	24	0.2
Kwethluk	Main channel	Backdoor bar	2008-06-22 09:04:00	Slimy sculpin	20	0.1
Kwethluk	Main channel	Backdoor bar	2008-06-22 09:04:00	Slimy sculpin	26	0.2
Kwethluk	Main channel	Backdoor bar	2008-06-22 09:04:00	Slimy sculpin	21	0.1
Kwethluk	Main channel	Backdoor bar	2008-06-22 09:04:00	Slimy sculpin	24	0.1
Kwethluk	Main channel	Backdoor bar	2008-06-22 09:04:00	Slimy sculpin	22	0.1
Kwethluk	Main channel	Backdoor bar	2008-06-22 09:04:00	Slimy sculpin	22	0.1
Kwethluk	Main channel	Backdoor bar	2008-06-22 09:04:00	Slimy sculpin	18	0.1
Kwethluk	Main channel	Backdoor bar	2008-06-22 09:04:00	Slimy sculpin	20	0.1
Kwethluk	Main channel	Backdoor bar	2008-06-22 09:04:00	Slimy sculpin	22	0.1
Kwethluk	Main channel	Backdoor bar	2008-06-22 09:04:00	Slimy sculpin	22	0.1
Kwethluk	Main channel	Backdoor bar	2008-06-22 09:04:00	Slimy sculpin	25	0.1
Kwethluk	Main channel	Backdoor bar	2008-06-22 09:04:00	Slimy sculpin	20	0.1
Kwethluk	Main channel	Backdoor bar	2008-06-22 09:04:00	Slimy sculpin	23	0.1
Kwethluk	Main channel	Backdoor bar	2008-06-22 09:04:00	Slimy sculpin	23	0.1
Kwethluk	Main channel	Backdoor bar	2008-06-22 09:04:00	Slimy sculpin	24	0.1
Kwethluk	Main channel	Backdoor bar	2008-06-22 09:04:00	Slimy sculpin	21	0.1
Kwethluk	Main channel	Backdoor bar	2008-06-22 09:04:00	Slimy sculpin	18	0.1
Kwethluk	Main channel	Backdoor bar	2008-06-22 09:04:00	Slimy sculpin	23	0.1
Kwethluk	Main channel	Backdoor bar	2008-06-22 09:04:00	Slimy sculpin	21	0.1
Kwethluk	Main channel	Backdoor bar	2008-06-22 09:04:00	Slimy sculpin	21	0.1
Kwethluk	Main channel	Backdoor bar	2008-06-22 09:04:00	Slimy sculpin	20	0.1
Kwethluk	Main channel	Backdoor bar	2008-06-22 09:04:00	Slimy sculpin	20	0.1
Kwethluk	Main channel	Backdoor bar	2008-06-22 09:04:00	Slimy sculpin	19	0.1
Kwethluk	Main channel	Backdoor bar	2008-06-22 09:04:00	Slimy sculpin	21	0.1
Kwethluk	Main channel	Backdoor bar	2008-06-22 09:04:00	Slimy sculpin	22	0.1
Kwethluk	Main channel	Backdoor bar	2008-06-22 09:04:00	Slimy sculpin	23	0.2
Kwethluk	Main channel	Backdoor bar	2008-06-22 09:04:00	Slimy sculpin	20	0.1
Kwethluk	Main channel	Backdoor bar	2008-06-22 09:04:00	Slimy sculpin	43	0.6
Kwethluk	Main channel	Backdoor bar	2008-06-22 09:04:00	Slimy sculpin	24	0.2
Kwethluk	Main channel	Backdoor bar	2008-06-22 09:04:00	Slimy sculpin	25	0.2
Kwethluk	Main channel	Backdoor bar	2008-06-22 09:04:00	Slimy sculpin	28	0.1
Kwethluk	Main channel	Backdoor bar	2008-06-22 09:04:00	Slimy sculpin	19	0.1
Kwethluk	Main channel	Backdoor bar	2008-06-22 09:04:00	Slimy sculpin	20	0.1
Kwethluk	Main channel	Backdoor bar	2008-06-22 09:04:00	Slimy sculpin	21	0.1
Kwethluk	Main channel	Backdoor bar	2008-06-22 09:04:00	Slimy sculpin	26	0.1
Kwethluk	Main channel	Backdoor bar	2008-06-22 09:04:00	Slimy sculpin	21	0.1
Kwethluk	Main channel	Backdoor bar	2008-06-22 09:04:00	Slimy sculpin	24	0.2
Kwethluk	Main channel	Backdoor bar	2008-06-22 09:04:00	Sockeye salmon	33	0.1
Kwethluk	Main channel	Elbow Main Channel	2008-08-19 11:31:00	Arctic grayling	66	1.7
Kwethluk	Main channel	Elbow Main Channel	2008-08-19 11:36:00	Arctic lamprey	75	0.5
Kwethluk	Main channel	Elbow Main Channel	2008-08-19 11:36:00	Arctic lamprey	106	1.6
Kwethluk	Main channel	Elbow Main Channel	2008-08-19 11:36:00	Arctic lamprey	81	0.6
Kwethluk	Main channel	Elbow Main Channel	2008-08-19 11:36:00	Arctic lamprey	148	3.6
Kwethluk	Main channel	Elbow Main Channel	2008-08-19 11:36:00	Arctic lamprey	90	1
Kwethluk	Main channel	Elbow Main Channel	2008-08-19 11:36:00	Arctic lamprey	124	2.2
Kwethluk	Main channel	Elbow Main Channel	2008-08-19 11:36:00	Arctic lamprey	90	1
Kwethluk	Main channel	Elbow Main Channel	2008-08-19 11:36:00	Arctic lamprey	95	1.1
Kwethluk	Main channel	Elbow Main Channel	2008-09-05 12:18:00	Chinook salmon	55	1.7
Kwethluk	Main channel	Elbow Main Channel	2008-09-05 12:18:00	Chinook salmon	61	2.9
Kwethluk	Main channel	Elbow Main Channel	2008-09-05 12:18:00	Chinook salmon	70	3.9
Kwethluk	Main channel	Elbow Main Channel	2008-09-05 12:18:00	Chinook salmon	67	3.4
Kwethluk	Main channel	Elbow Main Channel	2008-08-19 11:36:00	Chinook salmon	68	3.7
Kwethluk	Main channel	Elbow Main Channel	2008-08-19 11:36:00	Chinook salmon	63	2.7
Kwethluk	Main channel	Elbow Main Channel	2008-08-19 11:36:00	Chinook salmon	64	3
Kwethluk	Main channel	Elbow Main Channel	2008-08-19 11:36:00	Chinook salmon	63	2
Kwethluk	Main channel	Elbow Main Channel	2008-08-19 11:36:00	Chinook salmon	54	1.6
Kwethluk	Main channel	Elbow Main Channel	2008-08-19 11:36:00	Chinook salmon	60	2.1
Kwethluk	Main channel	Elbow Main Channel	2008-08-19 11:36:00	Chinook salmon	63	2.4
Kwethluk	Main channel	Elbow Main Channel	2008-08-19 11:36:00	Chinook salmon	63	2.4
Kwethluk	Main channel	Elbow Main Channel	2008-08-19 11:36:00	Chinook salmon	62	2.1
Kwethluk	Main channel	Elbow Main Channel	2008-08-19 11:36:00	Chinook salmon	63	2.7
Kwethluk	Main channel	Elbow Main Channel	2008-08-19 11:36:00	Chinook salmon	62	2.5
Kwethluk	Main channel	Elbow Main Channel	2008-08-19 11:36:00	Chinook salmon	62	2.6
Kwethluk	Main channel	Elbow Main Channel	2008-08-19 11:36:00	Chinook salmon	64	2.9
Kwethluk	Main channel	Elbow Main Channel	2008-08-19 11:36:00	Chinook salmon	53	1.8
Kwethluk	Main channel	Elbow Main Channel	2008-08-19 11:36:00	Chinook salmon	65	3
Kwethluk	Main channel	Elbow Main Channel	2008-08-19 11:36:00	Chinook salmon	61	2.3
Kwethluk	Main channel	Elbow Main Channel	2008-08-19 11:36:00	Chinook salmon	63	3
Kwethluk	Main channel	Elbow Main Channel	2008-08-19 11:36:00	Chinook salmon	58	2.3
Kwethluk	Main channel	Elbow Main Channel	2008-08-19 11:36:00	Chinook salmon	60	2.3
Kwethluk	Main channel	Elbow Main Channel	2008-08-19 11:36:00	Chinook salmon	55	1.9
Kwethluk	Main channel	Elbow Main Channel	2008-08-19 11:36:00	Chinook salmon	65	3
Kwethluk	Main channel	Elbow Main Channel	2008-09-05 12:18:00	Chinook salmon	71	3.6
Kwethluk	Main channel	Elbow Main Channel	2008-09-05 12:18:00	Chinook salmon	65	2.8
Kwethluk	Main channel	Elbow Main Channel	2008-08-19 11:36:00	Chinook salmon	58	1.9
Kwethluk	Main channel	Elbow Main Channel	2008-08-19 11:36:00	Chinook salmon	60	2.1
Kwethluk	Main channel	Elbow Main Channel	2008-08-19 11:36:00	Chinook salmon	65	0.9
Kwethluk	Main channel	Elbow Main Channel	2009-08-21 15:19:00	Chinook salmon	66	2.9
Kwethluk	Main channel	Elbow Main Channel	2009-08-21 15:19:00	Chinook salmon	66	3.1
Kwethluk	Main channel	Elbow Main Channel	2009-08-21 15:19:00	Chinook salmon	67	2.8
Kwethluk	Main channel	Elbow Main Channel	2009-08-21 15:19:00	Chinook salmon	69	3.3
Kwethluk	Main channel	Elbow Main Channel	2008-08-19 11:31:00	Chinook salmon	61	3.8
Kwethluk	Main channel	Elbow Main Channel	2008-08-19 11:31:00	Chinook salmon	60	1.8
Kwethluk	Main channel	Elbow Main Channel	2008-08-19 11:31:00	Chinook salmon	66	3.2
Kwethluk	Main channel	Elbow Main Channel	2008-08-19 11:31:00	Chinook salmon	65	2.7
Kwethluk	Main channel	Elbow Main Channel	2008-08-19 11:31:00	Chinook salmon	55	2.1
Kwethluk	Main channel	Elbow Main Channel	2008-08-19 11:31:00	Chinook salmon	62	2.4
Kwethluk	Main channel	Elbow Main Channel	2008-08-19 11:31:00	Coho Salmon	55	1.7
Kwethluk	Main channel	Elbow Main Channel	2008-08-19 11:31:00	Coho Salmon	59	2
Kwethluk	Main channel	Elbow Main Channel	2008-08-19 11:31:00	Coho Salmon	51	1.8
Kwethluk	Main channel	Elbow Main Channel	2008-08-19 11:31:00	Coho Salmon	49	1.4
Kwethluk	Main channel	Elbow Main Channel	2009-08-21 15:19:00	Coho Salmon	50	1.3
Kwethluk	Main channel	Elbow Main Channel	2009-08-21 15:19:00	Coho Salmon	43	0.8
Kwethluk	Main channel	Elbow Main Channel	2009-08-21 15:19:00	Coho Salmon	68	3.5
Kwethluk	Main channel	Elbow Main Channel	2009-08-21 15:19:00	Coho Salmon	66	2.9
Kwethluk	Main channel	Elbow Main Channel	2009-08-21 15:19:00	Coho Salmon	63	2.5
Kwethluk	Main channel	Elbow Main Channel	2009-08-21 15:19:00	Coho Salmon	63	2.7
Kwethluk	Main channel	Elbow Main Channel	2009-08-21 15:19:00	Coho Salmon	47	1.3
Kwethluk	Main channel	Elbow Main Channel	2009-08-21 15:19:00	Coho Salmon	67	2.5
Kwethluk	Main channel	Elbow Main Channel	2009-08-21 15:19:00	Coho Salmon	50	1.4
Kwethluk	Main channel	Elbow Main Channel	2009-08-21 15:19:00	Coho Salmon	47	1.1
Kwethluk	Main channel	Elbow Main Channel	2009-08-21 15:19:00	Coho Salmon	58	2.1
Kwethluk	Main channel	Elbow Main Channel	2009-08-21 15:19:00	Coho Salmon	65	2.8
Kwethluk	Main channel	Elbow Main Channel	2009-08-21 15:19:00	Coho Salmon	63	2.7
Kwethluk	Main channel	Elbow Main Channel	2009-08-21 15:19:00	Coho Salmon	65	2.7
Kwethluk	Main channel	Elbow Main Channel	2009-08-21 15:19:00	Coho Salmon	69	4.2
Kwethluk	Main channel	Elbow Main Channel	2009-08-21 15:19:00	Coho Salmon	48	1.4
Kwethluk	Main channel	Elbow Main Channel	2009-08-21 15:19:00	Coho Salmon	43	0.8
Kwethluk	Main channel	Elbow Main Channel	2009-08-21 15:19:00	Coho Salmon	50	1
Kwethluk	Main channel	Elbow Main Channel	2008-08-19 11:36:00	Coho Salmon	44	0.9
Kwethluk	Main channel	Elbow Main Channel	2008-08-19 11:36:00	Coho Salmon	40	0.8
Kwethluk	Main channel	Elbow Main Channel	2008-08-19 11:36:00	Coho Salmon	47	1.1
Kwethluk	Main channel	Elbow Main Channel	2008-08-19 11:36:00	Coho Salmon	53	1.7
Kwethluk	Main channel	Elbow Main Channel	2008-08-19 11:36:00	Coho Salmon	48	1.1
Kwethluk	Main channel	Elbow Main Channel	2008-08-19 11:36:00	Coho Salmon	54	1.6
Kwethluk	Main channel	Elbow Main Channel	2008-08-19 11:36:00	Coho Salmon	53	2.1
Kwethluk	Main channel	Elbow Main Channel	2008-08-19 11:36:00	Coho Salmon	52	1.5
Kwethluk	Main channel	Elbow Main Channel	2008-08-19 11:36:00	Coho Salmon	49	1.4
Kwethluk	Main channel	Elbow Main Channel	2008-06-29 12:05:00	Coho Salmon	52	0.9
Kwethluk	Main channel	Elbow Main Channel	2008-06-29 12:05:00	Coho Salmon	37	0.2
Kwethluk	Main channel	Elbow Main Channel	2008-06-29 12:05:00	Coho Salmon	50	0.9
Kwethluk	Main channel	Elbow Main Channel	2008-06-29 12:05:00	Coho Salmon	42	0.5
Kwethluk	Main channel	Elbow Main Channel	2008-06-29 12:05:00	Coho Salmon	39	0.2
Kwethluk	Main channel	Elbow Main Channel	2008-06-29 12:05:00	Coho Salmon	44	0.5
Kwethluk	Main channel	Elbow Main Channel	2008-06-29 12:05:00	Coho Salmon	42	0.6
Kwethluk	Main channel	Elbow Main Channel	2008-06-29 12:05:00	Coho Salmon	49	0.8
Kwethluk	Main channel	Elbow Main Channel	2008-06-29 12:05:00	Coho Salmon	49	0.9
Kwethluk	Main channel	Elbow Main Channel	2008-06-29 12:05:00	Coho Salmon	45	0.6
Kwethluk	Main channel	Elbow Main Channel	2008-06-29 12:05:00	Coho Salmon	50	1.2
Kwethluk	Main channel	Elbow Main Channel	2008-06-29 12:05:00	Coho Salmon	44	0.6
Kwethluk	Main channel	Elbow Main Channel	2008-06-29 12:05:00	Coho Salmon	52	1.5
Kwethluk	Main channel	Elbow Main Channel	2008-06-29 12:05:00	Coho Salmon	41	0.7
Kwethluk	Main channel	Elbow Main Channel	2008-06-29 12:05:00	Coho Salmon	45	0.3
Kwethluk	Main channel	Elbow Main Channel	2008-06-29 12:05:00	Coho Salmon	41	0.7
Kwethluk	Main channel	Elbow Main Channel	2008-06-29 12:05:00	Coho Salmon	40	0.6
Kwethluk	Main channel	Elbow Main Channel	2008-06-29 12:05:00	Coho Salmon	40	0.6
Kwethluk	Main channel	Elbow Main Channel	2008-06-29 12:05:00	Coho Salmon	46	0.9
Kwethluk	Main channel	Elbow Main Channel	2008-08-19 11:36:00	Coho Salmon	56	2.4
Kwethluk	Main channel	Elbow Main Channel	2008-08-19 11:36:00	Coho Salmon	42	1.4
Kwethluk	Main channel	Elbow Main Channel	2008-08-19 11:36:00	Coho Salmon	53	1.8
Kwethluk	Main channel	Elbow Main Channel	2008-08-19 11:36:00	Coho Salmon	52	1.5
Kwethluk	Main channel	Elbow Main Channel	2008-08-19 11:36:00	Coho Salmon	50	1.3
Kwethluk	Main channel	Elbow Main Channel	2008-08-19 11:36:00	Coho Salmon	44	1
Kwethluk	Main channel	Elbow Main Channel	2008-08-19 11:36:00	Coho Salmon	43	0.8
Kwethluk	Main channel	Elbow Main Channel	2008-08-19 11:36:00	Coho Salmon	40	0.5
Kwethluk	Main channel	Elbow Main Channel	2008-08-19 11:36:00	Coho Salmon	53	1.5
Kwethluk	Main channel	Elbow Main Channel	2008-08-19 11:36:00	Coho Salmon	47	1
Kwethluk	Main channel	Elbow Main Channel	2008-08-19 11:36:00	Coho Salmon	44	1.1
Kwethluk	Main channel	Elbow Main Channel	2009-08-21 15:19:00	Dolly Varden char	64	2.1
Kwethluk	Main channel	Elbow Main Channel	2009-08-21 15:19:00	Dolly Varden char	54	0.9
Kwethluk	Main channel	Elbow Main Channel	2008-08-19 11:36:00	Dolly Varden char	63	2.2
Kwethluk	Main channel	Elbow Main Channel	2008-09-05 12:18:00	Sculpin, unspeciated	22	0.1
Kwethluk	Main channel	Elbow Main Channel	2008-09-05 12:18:00	Sculpin, unspeciated	20	0.1
Kwethluk	Main channel	Elbow Main Channel	2008-09-05 12:18:00	Sculpin, unspeciated	17	0.1
Kwethluk	Main channel	Elbow Main Channel	2008-09-05 12:18:00	Sculpin, unspeciated	16	0.1
Kwethluk	Main channel	Elbow Main Channel	2008-09-05 12:18:00	Sculpin, unspeciated	16	0.1
Kwethluk	Main channel	Elbow Main Channel	2008-09-05 12:18:00	Sculpin, unspeciated	21	0.1
Kwethluk	Main channel	Elbow Main Channel	2008-09-05 12:18:00	Sculpin, unspeciated	24	0.1
Kwethluk	Main channel	Elbow Main Channel	2008-09-05 12:18:00	Sculpin, unspeciated	20	0.1
Kwethluk	Main channel	Elbow Main Channel	2008-09-05 12:18:00	Sculpin, unspeciated	20	0.1
Kwethluk	Main channel	Elbow Main Channel	2008-09-05 12:18:00	Sculpin, unspeciated	21	0.1
Kwethluk	Main channel	Elbow Main Channel	2008-08-19 11:36:00	Sculpin, unspeciated	75	4.1
Kwethluk	Main channel	Elbow Main Channel	2008-09-05 12:18:00	Sculpin, unspeciated	84	6
Kwethluk	Main channel	Elbow Main Channel	2008-09-05 12:18:00	Sculpin, unspeciated	62	2.5
Kwethluk	Main channel	Elbow Main Channel	2008-09-05 12:18:00	Sculpin, unspeciated	65	6.6
Kwethluk	Main channel	Elbow Main Channel	2008-09-05 12:18:00	Sculpin, unspeciated	21	0.1
Kwethluk	Main channel	Elbow Main Channel	2008-09-05 12:18:00	Sculpin, unspeciated	21	0.1
Kwethluk	Main channel	Elbow Main Channel	2008-09-05 12:18:00	Sculpin, unspeciated	16	0.1
Kwethluk	Main channel	Elbow Main Channel	2008-09-05 12:18:00	Sculpin, unspeciated	21	0.1
Kwethluk	Main channel	Elbow Main Channel	2008-09-05 12:18:00	Sculpin, unspeciated	20	0.1
Kwethluk	Main channel	Elbow Main Channel	2008-09-05 12:18:00	Sculpin, unspeciated	19	0.1
Kwethluk	Main channel	Elbow Main Channel	2008-09-05 12:18:00	Sculpin, unspeciated	22	0.1
Kwethluk	Main channel	Elbow Main Channel	2008-09-05 12:18:00	Sculpin, unspeciated	20	0.1
Kwethluk	Main channel	Elbow Main Channel	2008-09-05 12:18:00	Sculpin, unspeciated	22	0.1
Kwethluk	Main channel	Elbow Main Channel	2008-09-05 12:18:00	Sculpin, unspeciated	16	0.1
Kwethluk	Main channel	Elbow Main Channel	2008-09-05 12:18:00	Sculpin, unspeciated	21	0.1
Kwethluk	Main channel	Elbow Main Channel	2008-06-29 12:05:00	Slimy sculpin	54	1.4
Kwethluk	Main channel	Elbow Main Channel	2008-06-29 12:05:00	Slimy sculpin	55	0.8
Kwethluk	Main channel	Elbow Main Channel	2008-06-29 12:05:00	Slimy sculpin	66	2.2
Kwethluk	Main channel	Elbow Main Channel	2008-06-29 12:05:00	Slimy sculpin	44	0.6
Kwethluk	Main channel	Elbow Main Channel	2008-06-29 12:05:00	Slimy sculpin	30	0.3
Kwethluk	Main channel	Elbow Main Channel	2008-06-29 12:05:00	Slimy sculpin	55	1.1
Kwethluk	Main channel	Elbow Main Channel	2008-06-29 12:05:00	Slimy sculpin	54	1.9
Kwethluk	Main channel	Elbow Main Channel	2008-06-29 12:05:00	Slimy sculpin	50	1.9
Kwethluk	Main channel	Elbow Main Channel	2008-06-29 12:05:00	Slimy sculpin	48	0.9
Kwethluk	Main channel	Elbow Main Channel	2008-06-29 12:05:00	Slimy sculpin	42	0.7
Kwethluk	Main channel	Elbow Main Channel	2008-06-29 12:05:00	Slimy sculpin	59	2.3
Kwethluk	Main channel	Elbow Main Channel	2008-06-29 12:05:00	Slimy sculpin	59	1.8
Kwethluk	Main channel	Elbow Main Channel	2008-06-29 12:05:00	Slimy sculpin	24	0.1
Kwethluk	Main channel	Elbow Main Channel	2008-06-29 12:05:00	Slimy sculpin	26	0.1
Kwethluk	Main channel	Elbow Main Channel	2008-06-29 12:05:00	Slimy sculpin	65	3.2
Kwethluk	Main channel	Elbow Main Channel	2008-06-29 12:05:00	Slimy sculpin	45	1.1
Kwethluk	Main channel	Elbow Main Channel	2008-06-29 12:05:00	Slimy sculpin	60	2.4
Kwethluk	Main channel	Elbow Main Channel	2008-06-29 12:05:00	Slimy sculpin	28	0.2
Kwethluk	Main channel	Elbow Main Channel	2008-06-29 12:05:00	Slimy sculpin	26	0.1
Kwethluk	Main channel	Elbow Main Channel	2008-06-29 12:05:00	Slimy sculpin	22	0.1
Kwethluk	Main channel	Elbow Main Channel	2008-06-29 12:05:00	Slimy sculpin	25	0.2
Kwethluk	Main channel	Elbow Main Channel	2008-06-29 12:05:00	Slimy sculpin	27	0.2
Kwethluk	Main channel	Elbow Main Channel	2008-06-29 12:05:00	Slimy sculpin	25	0.2
Kwethluk	Main channel	Elbow Main Channel	2008-08-19 11:31:00	Slimy sculpin	72	3.8
Kwethluk	Main channel	Elbow Main Channel	2008-08-19 11:31:00	Slimy sculpin	18	0.1
Kwethluk	Main channel	Elbow Main Channel	2008-08-19 11:31:00	Slimy sculpin	19	0.1
Kwethluk	Main channel	Elbow Main Channel	2008-08-19 11:36:00	Slimy sculpin	32	1.3
Kwethluk	Main channel	Elbow Main Channel	2008-08-19 11:36:00	Slimy sculpin	66	2.7
Kwethluk	Main channel	Elbow Main Channel	2008-08-19 11:36:00	Slimy sculpin	58	2.2
Kwethluk	Main channel	Elbow Main Channel	2008-08-19 11:36:00	Slimy sculpin	78	4.8
Kwethluk	Main channel	Elbow Main Channel	2008-08-19 11:36:00	Slimy sculpin	93	8.3
Kwethluk	Main channel	Elbow Main Channel	2008-08-19 11:36:00	Slimy sculpin	77	5.1
Kwethluk	Main channel	Elbow Main Channel	2008-08-19 11:36:00	Slimy sculpin	62	2.7
Kwethluk	Main channel	Elbow Main Channel	2008-08-19 11:36:00	Slimy sculpin	67	1.9
Kwethluk	Main channel	Elbow Main Channel	2008-08-19 11:36:00	Slimy sculpin	55	1.8
Kwethluk	Main channel	Elbow Main Channel	2008-08-19 11:36:00	Slimy sculpin	52	1.6
Kwethluk	Main channel	Elbow Main Channel	2008-08-19 11:36:00	Slimy sculpin	71	3.7
Kwethluk	Main channel	Elbow Main Channel	2008-08-19 11:36:00	Slimy sculpin	69	3.5
Kwethluk	Main channel	Elbow Main Channel	2008-08-19 11:36:00	Slimy sculpin	22	0.1
Kwethluk	Main channel	Elbow Main Channel	2008-08-19 11:36:00	Slimy sculpin	68	3.5
Kwethluk	Main channel	Elbow Main Channel	2008-08-19 11:36:00	Slimy sculpin	17	0.1
Kwethluk	Main channel	Elbow Main Channel	2008-08-19 11:36:00	Slimy sculpin	16	0.1
Kwethluk	Main channel	Elbow Main Channel	2008-08-19 11:36:00	Slimy sculpin	18	0.1
Kwethluk	Main channel	Elbow Main Channel	2008-08-19 11:36:00	Slimy sculpin	15	0.1
Kwethluk	Main channel	Elbow Main Channel	2008-08-19 11:36:00	Slimy sculpin	46	0.9
Kwethluk	Main channel	Elbow Main Channel	2008-08-19 11:36:00	Slimy sculpin	73	3.9
Kwethluk	Main channel	Elbow Main Channel	2008-08-19 11:36:00	Slimy sculpin	66	3
Kwethluk	Main channel	Elbow Main Channel	2008-08-19 11:36:00	Slimy sculpin	21	0.1
Kwethluk	Main channel	Elbow Main Channel	2008-08-19 11:36:00	Slimy sculpin	22	0.1
Kwethluk	Main channel	Elbow Main Channel	2008-08-19 11:36:00	Slimy sculpin	21	0.1
Kwethluk	Main channel	Elbow Main Channel	2008-08-19 11:36:00	Slimy sculpin	22	0.1
Kwethluk	Main channel	Elbow Main Channel	2008-08-19 11:36:00	Slimy sculpin	21	0.1
Kwethluk	Main channel	Elbow Main Channel	2008-08-19 11:36:00	Slimy sculpin	78	4.2
Kwethluk	Main channel	Elbow Main Channel	2008-08-19 11:36:00	Slimy sculpin	19	0.1
Kwethluk	Main channel	Elbow Main Channel	2008-08-19 11:36:00	Slimy sculpin	19	0.1
Kwethluk	Main channel	Elbow Main Channel	2008-08-19 11:36:00	Slimy sculpin	22	0.1
Kwethluk	Main channel	Elbow Main Channel	2008-08-19 11:36:00	Slimy sculpin	21	0.1
Kwethluk	Main channel	Elbow Main Channel	2008-08-19 11:36:00	Slimy sculpin	21	0.1
Kwethluk	Main channel	Elbow Main Channel	2008-08-19 11:36:00	Slimy sculpin	22	0.1
Kwethluk	Main channel	Elbow Main Channel	2008-08-19 11:36:00	Slimy sculpin	20	0.1
Kwethluk	Main channel	Elbow Main Channel	2009-08-21 15:19:00	Slimy sculpin	20	0.1
Kwethluk	Main channel	Elbow Main Channel	2009-08-21 15:19:00	Slimy sculpin	20	0.1
Kwethluk	Main channel	Elbow Main Channel	2009-08-21 15:19:00	Slimy sculpin	20	0.1
Kwethluk	Main channel	Elbow Main Channel	2009-08-21 15:19:00	Slimy sculpin	20	0.1
Kwethluk	Main channel	Elbow Main Channel	2009-08-21 15:19:00	Slimy sculpin	20	0.1
Kwethluk	Main channel	Elbow Main Channel	2009-08-21 15:19:00	Slimy sculpin	20	0.1
Kwethluk	Main channel	Elbow Main Channel	2009-08-21 15:19:00	Slimy sculpin	20	0.1
Kwethluk	Main channel	Elbow Main Channel	2009-08-21 15:19:00	Slimy sculpin	20	0.1
Kwethluk	Main channel	Elbow Main Channel	2009-08-21 15:19:00	Slimy sculpin	20	0.1
Kwethluk	Main channel	Elbow Main Channel	2009-08-21 15:19:00	Slimy sculpin	20	0.1
Kwethluk	Main channel	Elbow Main Channel	2009-08-21 15:19:00	Slimy sculpin	20	0.1
Kwethluk	Main channel	Elbow Main Channel	2009-08-21 15:19:00	Slimy sculpin	20	0.1
Kwethluk	Main channel	Elbow Main Channel	2009-08-21 15:19:00	Slimy sculpin	20	0.1
Kwethluk	Main channel	Elbow Main Channel	2009-08-21 15:19:00	Slimy sculpin	20	0.1
Kwethluk	Main channel	Elbow Main Channel	2009-08-21 15:19:00	Slimy sculpin	20	0.1
Kwethluk	Main channel	Elbow Main Channel	2009-08-21 15:19:00	Slimy sculpin	20	0.1
Kwethluk	Main channel	Elbow Main Channel	2009-08-21 15:19:00	Slimy sculpin	20	0.1
Kwethluk	Main channel	Elbow Main Channel	2009-08-21 15:19:00	Slimy sculpin	20	0.1
Kwethluk	Main channel	Elbow Main Channel	2009-08-21 15:19:00	Slimy sculpin	66	3
Kwethluk	Main channel	Elbow Main Channel	2009-08-21 15:19:00	Slimy sculpin	68	3.6
Kwethluk	Main channel	Elbow Main Channel	2009-08-21 15:19:00	Slimy sculpin	20	0.1
Kwethluk	Main channel	Elbow Main Channel	2009-08-21 15:19:00	Slimy sculpin	20	0.1
Kwethluk	Main channel	Elbow Main Channel	2009-08-21 15:19:00	Slimy sculpin	20	0.1
Kwethluk	Main channel	Elbow Main Channel	2009-08-21 15:19:00	Slimy sculpin	20	0.1
Kwethluk	Main channel	Elbow Main Channel	2009-08-21 15:19:00	Slimy sculpin	20	0.1
Kwethluk	Main channel	Elbow Main Channel	2009-08-21 15:19:00	Slimy sculpin	20	0.1
Kwethluk	Main channel	Elbow Main Channel	2009-08-21 15:19:00	Slimy sculpin	20	0.1
Kwethluk	Main channel	Elbow Main Channel	2009-08-21 15:19:00	Slimy sculpin	20	0.1
Kwethluk	Main channel	Elbow Main Channel	2009-08-21 15:19:00	Slimy sculpin	20	0.1
Kwethluk	Main channel	Elbow Main Channel	2009-08-21 15:19:00	Slimy sculpin	60	2.1
Kwethluk	Main channel	Elbow Main Channel	2009-08-21 15:19:00	Slimy sculpin	20	0.1
Kwethluk	Main channel	Elbow Main Channel	2009-08-21 15:19:00	Slimy sculpin	20	0.1
Kwethluk	Main channel	Elbow Main Channel	2009-08-21 15:19:00	Slimy sculpin	20	0.1
Kwethluk	Main channel	Elbow Main Channel	2009-08-21 15:19:00	Slimy sculpin	20	0.1
Kwethluk	Main channel	Elbow Main Channel	2009-08-21 15:19:00	Slimy sculpin	20	0.1
Kwethluk	Main channel	Elbow Main Channel	2009-08-21 15:19:00	Slimy sculpin	20	0.1
Kwethluk	Main channel	Elbow Main Channel	2009-08-21 15:19:00	Slimy sculpin	20	0.1
Kwethluk	Main channel	Elbow Main Channel	2009-08-21 15:19:00	Slimy sculpin	20	0.1
Kwethluk	Main channel	Elbow Main Channel	2009-08-21 15:19:00	Slimy sculpin	20	0.1
Kwethluk	Main channel	Elbow Main Channel	2009-08-21 15:19:00	Slimy sculpin	20	0.1
Kwethluk	Main channel	Elbow Main Channel	2009-08-21 15:19:00	Slimy sculpin	20	0.1
Kwethluk	Main channel	Elbow Main Channel	2009-08-21 15:19:00	Slimy sculpin	20	0.1
Kwethluk	Main channel	Elbow Main Channel	2009-08-21 15:19:00	Slimy sculpin	20	0.1
Kwethluk	Main channel	Elbow Main Channel	2009-08-21 15:19:00	Slimy sculpin	20	0.1
Kwethluk	Main channel	Elbow Main Channel	2009-08-21 15:19:00	Slimy sculpin	20	0.1
Kwethluk	Main channel	Elbow Main Channel	2009-08-21 15:19:00	Slimy sculpin	20	0.1
Kwethluk	Main channel	Elbow Main Channel	2009-08-21 15:19:00	Slimy sculpin	20	0.1
Kwethluk	Main channel	Elbow Main Channel	2009-08-21 15:19:00	Slimy sculpin	20	0.1
Kwethluk	Main channel	Elbow Main Channel	2009-08-21 15:19:00	Slimy sculpin	20	0.1
Kwethluk	Main channel	Elbow Main Channel	2009-08-21 15:19:00	Slimy sculpin	20	0.1
Kwethluk	Main channel	Elbow Main Channel	2009-08-21 15:19:00	Slimy sculpin	20	0.1
Kwethluk	Main channel	Elbow Main Channel	2009-08-21 15:19:00	Slimy sculpin	20	0.1
Kwethluk	Main channel	Elbow Main Channel	2009-08-21 15:19:00	Slimy sculpin	20	0.1
Kwethluk	Main channel	Elbow Main Channel	2009-08-21 15:19:00	Slimy sculpin	20	0.1
Kwethluk	Main channel	Elbow Main Channel	2009-08-21 15:19:00	Slimy sculpin	20	0.1
Kwethluk	Main channel	Elbow Main Channel	2009-08-21 15:19:00	Slimy sculpin	20	0.1
Kwethluk	Main channel	Elbow Main Channel	2009-08-21 15:19:00	Slimy sculpin	20	0.1
Kwethluk	Main channel	Elbow Main Channel	2009-08-21 15:19:00	Slimy sculpin	20	0.1
Kwethluk	Main channel	Elbow Main Channel	2009-08-21 15:19:00	Slimy sculpin	20	0.1
Kwethluk	Main channel	Elbow Main Channel	2009-08-21 15:19:00	Slimy sculpin	20	0.1
Kwethluk	Main channel	Elbow Main Channel	2009-08-21 15:19:00	Slimy sculpin	20	0.1
Kwethluk	Main channel	Elbow Main Channel	2009-08-21 15:19:00	Slimy sculpin	20	0.1
Kwethluk	Main channel	Elbow Main Channel	2009-08-21 15:19:00	Slimy sculpin	20	0.1
Kwethluk	Main channel	Elbow Main Channel	2009-08-21 15:19:00	Slimy sculpin	20	0.1
Kwethluk	Main channel	Elbow Main Channel	2009-08-21 15:19:00	Slimy sculpin	20	0.1
Kwethluk	Main channel	Elbow Main Channel	2009-08-21 15:19:00	Slimy sculpin	20	0.1
Kwethluk	Main channel	Elbow Main Channel	2009-08-21 15:19:00	Slimy sculpin	20	0.1
Kwethluk	Main channel	Elbow Main Channel	2009-08-21 15:19:00	Slimy sculpin	20	0.1
Kwethluk	Main channel	Elbow Main Channel	2009-08-21 15:19:00	Slimy sculpin	20	0.1
Kwethluk	Main channel	Elbow Main Channel	2009-08-21 15:19:00	Slimy sculpin	20	0.1
Kwethluk	Main channel	Elbow Main Channel	2009-08-21 15:19:00	Slimy sculpin	20	0.1
Kwethluk	Main channel	Elbow Main Channel	2009-08-21 15:19:00	Slimy sculpin	20	0.1
Kwethluk	Main channel	Elbow Main Channel	2009-08-21 15:19:00	Slimy sculpin	20	0.1
Kwethluk	Main channel	Elbow Main Channel	2009-08-21 15:19:00	Slimy sculpin	20	0.1
Kwethluk	Main channel	Elbow Main Channel	2009-08-21 15:19:00	Slimy sculpin	20	0.1
Kwethluk	Main channel	Elbow Main Channel	2009-08-21 15:19:00	Slimy sculpin	20	0.1
Kwethluk	Main channel	Elbow Main Channel	2009-08-21 15:19:00	Slimy sculpin	20	0.1
Kwethluk	Main channel	Elbow Main Channel	2009-08-21 15:19:00	Slimy sculpin	20	0.1
Kwethluk	Main channel	Elbow Main Channel	2009-08-21 15:19:00	Slimy sculpin	20	0.1
Kwethluk	Main channel	Elbow Main Channel	2009-08-21 15:19:00	Slimy sculpin	20	0.1
Kwethluk	Main channel	Elbow Main Channel	2009-08-21 15:19:00	Slimy sculpin	20	0.1
Kwethluk	Main channel	Elbow Main Channel	2009-08-21 15:19:00	Slimy sculpin	20	0.1
Kwethluk	Main channel	Elbow Main Channel	2009-08-21 15:19:00	Slimy sculpin	47	1.2
Kwethluk	Main channel	Elbow Main Channel	2009-08-21 15:19:00	Slimy sculpin	20	0.1
Kwethluk	Main channel	Elbow Main Channel	2009-08-21 15:19:00	Slimy sculpin	20	0.1
Kwethluk	Main channel	Elbow Main Channel	2009-08-21 15:19:00	Slimy sculpin	20	0.1
Kwethluk	Main channel	Elbow Main Channel	2009-08-21 15:19:00	Slimy sculpin	20	0.1
Kwethluk	Main channel	Elbow Main Channel	2009-08-21 15:19:00	Slimy sculpin	20	0.1
Kwethluk	Main channel	Elbow Main Channel	2009-08-21 15:19:00	Slimy sculpin	20	0.1
Kwethluk	Main channel	Elbow Main Channel	2009-08-21 15:19:00	Slimy sculpin	20	0.1
Kwethluk	Main channel	Elbow Main Channel	2009-08-21 15:19:00	Slimy sculpin	20	0.1
Kwethluk	Main channel	Elbow Main Channel	2009-08-21 15:19:00	Slimy sculpin	20	0.1
Kwethluk	Main channel	Elbow Main Channel	2009-08-21 15:19:00	Slimy sculpin	20	0.1
Kwethluk	Main channel	Elbow Main Channel	2009-08-21 15:19:00	Slimy sculpin	20	0.1
Kwethluk	Main channel	Elbow Main Channel	2009-08-21 15:19:00	Slimy sculpin	20	0.1
Kwethluk	Main channel	Elbow Main Channel	2009-08-21 15:19:00	Slimy sculpin	20	0.1
Kwethluk	Main channel	Elbow Main Channel	2009-08-21 15:19:00	Slimy sculpin	20	0.1
Kwethluk	Main channel	Elbow Main Channel	2009-08-21 15:19:00	Slimy sculpin	20	0.1
Kwethluk	Main channel	Elbow Main Channel	2009-08-21 15:19:00	Slimy sculpin	20	0.1
Kwethluk	Main channel	Elbow Main Channel	2009-08-21 15:19:00	Slimy sculpin	20	0.1
Kwethluk	Main channel	Elbow Main Channel	2009-08-21 15:19:00	Slimy sculpin	20	0.1
Kwethluk	Main channel	Elbow Main Channel	2009-08-21 15:19:00	Slimy sculpin	20	0.1
Kwethluk	Main channel	Elbow Main Channel	2009-08-21 15:19:00	Slimy sculpin	20	0.1
Kwethluk	Main channel	Elbow Main Channel	2009-08-21 15:19:00	Slimy sculpin	20	0.1
Kwethluk	Main channel	Elbow Main Channel	2009-08-21 15:19:00	Slimy sculpin	20	0.1
Kwethluk	Main channel	Elbow Main Channel	2009-08-21 15:19:00	Slimy sculpin	20	0.1
Kwethluk	Main channel	Elbow Main Channel	2009-08-21 15:19:00	Slimy sculpin	20	0.1
Kwethluk	Main channel	Elbow Main Channel	2009-08-21 15:19:00	Slimy sculpin	20	0.1
Kwethluk	Main channel	Elbow Main Channel	2009-08-21 15:19:00	Slimy sculpin	20	0.1
Kwethluk	Main channel	Elbow Main Channel	2009-08-21 15:19:00	Slimy sculpin	20	0.1
Kwethluk	Main channel	Elbow Main Channel	2009-08-21 15:19:00	Slimy sculpin	20	0.1
Kwethluk	Main channel	Elbow Main Channel	2009-08-21 15:19:00	Slimy sculpin	20	0.1
Kwethluk	Main channel	Elbow Main Channel	2009-08-21 15:19:00	Slimy sculpin	20	0.1
Kwethluk	Main channel	Elbow Main Channel	2009-08-21 15:19:00	Slimy sculpin	20	0.1
Kwethluk	Main channel	Elbow Main Channel	2009-08-21 15:19:00	Slimy sculpin	75	4.7
Kwethluk	Main channel	Elbow Main Channel	2009-08-21 15:19:00	Slimy sculpin	65	3.5
Kwethluk	Main channel	Elbow Main Channel	2009-08-21 15:19:00	Slimy sculpin	20	0.1
Kwethluk	Main channel	Elbow Main Channel	2009-08-21 15:19:00	Slimy sculpin	20	0.1
Kwethluk	Main channel	Elbow Main Channel	2009-08-21 15:19:00	Slimy sculpin	20	0.1
Kwethluk	Main channel	Elbow Main Channel	2009-08-21 15:19:00	Slimy sculpin	20	0.1
Kwethluk	Main channel	Elbow Main Channel	2009-08-21 15:19:00	Slimy sculpin	20	0.1
Kwethluk	Main channel	Elbow Main Channel	2009-08-21 15:19:00	Slimy sculpin	20	0.1
Kwethluk	Main channel	Elbow Main Channel	2009-08-21 15:19:00	Slimy sculpin	20	0.1
Kwethluk	Main channel	Elbow Main Channel	2009-08-21 15:19:00	Slimy sculpin	20	0.1
Kwethluk	Main channel	Elbow Main Channel	2009-08-21 15:19:00	Slimy sculpin	64	2.4
Kwethluk	Main channel	Elbow Main Channel	2009-08-21 15:19:00	Slimy sculpin	51	1.2
Kwethluk	Main channel	Elbow Main Channel	2009-08-21 15:19:00	Slimy sculpin	63	2.7
Kwethluk	Main channel	Elbow Main Channel	2009-08-21 15:19:00	Slimy sculpin	20	0.1
Kwethluk	Main channel	Elbow Main Channel	2009-08-21 15:19:00	Slimy sculpin	20	0.1
Kwethluk	Main channel	Elbow Main Channel	2009-08-21 15:19:00	Slimy sculpin	20	0.1
Kwethluk	Main channel	Elbow Main Channel	2009-08-21 15:19:00	Slimy sculpin	20	0.1
Kwethluk	Main channel	Elbow Main Channel	2009-08-21 15:19:00	Slimy sculpin	20	0.1
Kwethluk	Main channel	Elbow Main Channel	2009-08-21 15:19:00	Slimy sculpin	53	1.6
Kwethluk	Main channel	Elbow Main Channel	2009-08-21 15:19:00	Slimy sculpin	20	0.1
Kwethluk	Main channel	Elbow Main Channel	2009-08-21 15:19:00	Slimy sculpin	20	0.1
Kwethluk	Main channel	Elbow Main Channel	2009-08-21 15:19:00	Slimy sculpin	20	0.1
Kwethluk	Main channel	Elbow Main Channel	2009-08-21 15:19:00	Slimy sculpin	20	0.1
Kwethluk	Main channel	Elbow Main Channel	2009-08-21 15:19:00	Slimy sculpin	20	0.1
Kwethluk	Main channel	Elbow Main Channel	2009-08-21 15:19:00	Slimy sculpin	20	0.1
Kwethluk	Main channel	Elbow Main Channel	2009-08-21 15:19:00	Slimy sculpin	20	0.1
Kwethluk	Main channel	Elbow Main Channel	2009-08-21 15:19:00	Slimy sculpin	20	0.1
Kwethluk	Main channel	Elbow Main Channel	2009-08-21 15:19:00	Slimy sculpin	20	0.1
Kwethluk	Main channel	Elbow Main Channel	2009-08-21 15:19:00	Slimy sculpin	20	0.1
Kwethluk	Main channel	Elbow Main Channel	2009-08-21 15:19:00	Slimy sculpin	20	0.1
Kwethluk	Main channel	Elbow Main Channel	2009-08-21 15:19:00	Slimy sculpin	20	0.1
Kwethluk	Main channel	Elbow Main Channel	2009-08-21 15:19:00	Slimy sculpin	20	0.1
Kwethluk	Main channel	Elbow Main Channel	2009-08-21 15:19:00	Slimy sculpin	20	0.1
Kwethluk	Main channel	Elbow Main Channel	2009-08-21 15:19:00	Slimy sculpin	20	0.1
Kwethluk	Main channel	Elbow Main Channel	2009-08-21 15:19:00	Slimy sculpin	20	0.1
Kwethluk	Main channel	Elbow Main Channel	2009-08-21 15:19:00	Slimy sculpin	20	0.1
Kwethluk	Main channel	Elbow Main Channel	2009-08-21 15:19:00	Slimy sculpin	20	0.1
Kwethluk	Main channel	Elbow Main Channel	2009-08-21 15:19:00	Slimy sculpin	20	0.1
Kwethluk	Main channel	Elbow Main Channel	2009-08-21 15:19:00	Slimy sculpin	20	0.1
Kwethluk	Main channel	Elbow Main Channel	2009-08-21 15:19:00	Slimy sculpin	20	0.1
Kwethluk	Main channel	Elbow Main Channel	2009-08-21 15:19:00	Slimy sculpin	20	0.1
Kwethluk	Main channel	Elbow Main Channel	2009-08-21 15:19:00	Slimy sculpin	20	0.1
Kwethluk	Main channel	Elbow Main Channel	2009-08-21 15:19:00	Slimy sculpin	20	0.1
Kwethluk	Main channel	Elbow Main Channel	2009-08-21 15:19:00	Slimy sculpin	20	0.1
Kwethluk	Main channel	Elbow Main Channel	2009-08-21 15:19:00	Slimy sculpin	20	0.1
Kwethluk	Main channel	Elbow Main Channel	2009-08-21 15:19:00	Slimy sculpin	20	0.1
Kwethluk	Main channel	Elbow Main Channel	2009-08-21 15:19:00	Slimy sculpin	20	0.1
Kwethluk	Main channel	Elbow Main Channel	2009-08-21 15:19:00	Slimy sculpin	20	0.1
Kwethluk	Main channel	Elbow Main Channel	2009-08-21 15:19:00	Slimy sculpin	20	0.1
Kwethluk	Main channel	Elbow Main Channel	2009-08-21 15:19:00	Slimy sculpin	20	0.1
Kwethluk	Main channel	Elbow Main Channel	2009-08-21 15:19:00	Slimy sculpin	20	0.1
Kwethluk	Main channel	Elbow Main Channel	2009-08-21 15:19:00	Slimy sculpin	20	0.1
Kwethluk	Main channel	Elbow Main Channel	2009-08-21 15:19:00	Slimy sculpin	20	0.1
Kwethluk	Main channel	Elbow Main Channel	2009-08-21 15:19:00	Slimy sculpin	20	0.1
Kwethluk	Main channel	Elbow Main Channel	2009-08-21 15:19:00	Slimy sculpin	42	0.8
Kwethluk	Main channel	Elbow Main Channel	2009-08-21 15:19:00	Slimy sculpin	35	0.2
Kwethluk	Main channel	Elbow Main Channel	2009-08-21 15:19:00	Slimy sculpin	20	0.1
Kwethluk	Main channel	Elbow Main Channel	2009-08-21 15:19:00	Slimy sculpin	20	0.1
Kwethluk	Main channel	Elbow Main Channel	2009-08-21 15:19:00	Slimy sculpin	20	0.1
Kwethluk	Main channel	Elbow Main Channel	2009-08-21 15:19:00	Slimy sculpin	20	0.1
Kwethluk	Main channel	Elbow Main Channel	2009-08-21 15:19:00	Slimy sculpin	20	0.1
Kwethluk	Main channel	Elbow Main Channel	2009-08-21 15:19:00	Slimy sculpin	20	0.1
Kwethluk	Main channel	Elbow Main Channel	2009-08-21 15:19:00	Slimy sculpin	20	0.1
Kwethluk	Main channel	Elbow Main Channel	2009-08-21 15:19:00	Slimy sculpin	20	0.1
Kwethluk	Main channel	Elbow Main Channel	2009-08-21 15:19:00	Slimy sculpin	20	0.1
Kwethluk	Main channel	Elbow Main Channel	2009-08-21 15:19:00	Slimy sculpin	20	0.1
Kwethluk	Main channel	Elbow Main Channel	2009-08-21 15:19:00	Slimy sculpin	20	0.1
Kwethluk	Main channel	Elbow Main Channel	2009-08-21 15:19:00	Slimy sculpin	20	0.1
Kwethluk	Main channel	Elbow Main Channel	2009-08-21 15:19:00	Slimy sculpin	20	0.1
Kwethluk	Main channel	Elbow Main Channel	2009-08-21 15:19:00	Slimy sculpin	20	0.1
Kwethluk	Main channel	Elbow Main Channel	2009-08-21 15:19:00	Slimy sculpin	20	0.1
Kwethluk	Main channel	Elbow Main Channel	2009-08-21 15:19:00	Slimy sculpin	20	0.1
Kwethluk	Main channel	Elbow Main Channel	2009-08-21 15:19:00	Slimy sculpin	20	0.1
Kwethluk	Main channel	Elbow Main Channel	2009-08-21 15:19:00	Slimy sculpin	20	0.1
Kwethluk	Main channel	Elbow Main Channel	2009-08-21 15:19:00	Slimy sculpin	20	0.1
Kwethluk	Main channel	Elbow Main Channel	2009-08-21 15:19:00	Slimy sculpin	20	0.1
Kwethluk	Main channel	Elbow Main Channel	2009-08-21 15:19:00	Slimy sculpin	20	0.1
Kwethluk	Main channel	Elbow Main Channel	2009-08-21 15:19:00	Slimy sculpin	20	0.1
Kwethluk	Main channel	Elbow Main Channel	2009-08-21 15:19:00	Slimy sculpin	20	0.1
Kwethluk	Main channel	Elbow Main Channel	2009-08-21 15:19:00	Slimy sculpin	20	0.1
Kwethluk	Main channel	Elbow Main Channel	2009-08-21 15:19:00	Slimy sculpin	20	0.1
Kwethluk	Main channel	Elbow Main Channel	2009-08-21 15:19:00	Slimy sculpin	20	0.1
Kwethluk	Main channel	Elbow Main Channel	2009-08-21 15:19:00	Slimy sculpin	20	0.1
Kwethluk	Main channel	Elbow Main Channel	2009-08-21 15:19:00	Slimy sculpin	20	0.1
Kwethluk	Main channel	Elbow Main Channel	2009-08-21 15:19:00	Slimy sculpin	20	0.1
Kwethluk	Main channel	Elbow Main Channel	2009-08-21 15:19:00	Slimy sculpin	20	0.1
Kwethluk	Main channel	Elbow Main Channel	2009-08-21 15:19:00	Slimy sculpin	20	0.1
Kwethluk	Main channel	Elbow Main Channel	2009-08-21 15:19:00	Slimy sculpin	20	0.1
Kwethluk	Main channel	Elbow Main Channel	2009-08-21 15:19:00	Slimy sculpin	20	0.1
Kwethluk	Main channel	Elbow Main Channel	2009-08-21 15:19:00	Slimy sculpin	20	0.1
Kwethluk	Main channel	Elbow Main Channel	2009-08-21 15:19:00	Slimy sculpin	20	0.1
Kwethluk	Main channel	Elbow Main Channel	2009-08-21 15:19:00	Slimy sculpin	20	0.1
Kwethluk	Main channel	Elbow Main Channel	2009-08-21 15:19:00	Slimy sculpin	20	0.1
Kwethluk	Main channel	Elbow Main Channel	2009-08-21 15:19:00	Slimy sculpin	20	0.1
Kwethluk	Main channel	Elbow Main Channel	2009-08-21 15:19:00	Slimy sculpin	20	0.1
Kwethluk	Main channel	Elbow Main Channel	2009-08-21 15:19:00	Slimy sculpin	20	0.1
Kwethluk	Main channel	Elbow Main Channel	2009-08-21 15:19:00	Slimy sculpin	20	0.1
Kwethluk	Main channel	Elbow Main Channel	2009-08-21 15:19:00	Slimy sculpin	20	0.1
Kwethluk	Main channel	Elbow Main Channel	2009-08-21 15:19:00	Slimy sculpin	20	0.1
Kwethluk	Main channel	Elbow Main Channel	2009-08-21 15:19:00	Slimy sculpin	20	0.1
Kwethluk	Main channel	Elbow Main Channel	2009-08-21 15:19:00	Slimy sculpin	20	0.1
Kwethluk	Main channel	Elbow Main Channel	2009-08-21 15:19:00	Slimy sculpin	20	0.1
Kwethluk	Main channel	Elbow Main Channel	2009-08-21 15:19:00	Slimy sculpin	20	0.1
Kwethluk	Main channel	Elbow Main Channel	2009-08-21 15:19:00	Slimy sculpin	20	0.1
Kwethluk	Main channel	Elbow Main Channel	2009-08-21 15:19:00	Slimy sculpin	20	0.1
Kwethluk	Main channel	Elbow Main Channel	2009-08-21 15:19:00	Slimy sculpin	20	0.1
Kwethluk	Main channel	Elbow Main Channel	2009-08-21 15:19:00	Slimy sculpin	20	0.1
Kwethluk	Main channel	Elbow Main Channel	2009-08-21 15:19:00	Slimy sculpin	20	0.1
Kwethluk	Main channel	Elbow Main Channel	2009-08-21 15:19:00	Slimy sculpin	20	0.1
Kwethluk	Main channel	Elbow Main Channel	2009-08-21 15:19:00	Slimy sculpin	20	0.1
Kwethluk	Main channel	Elbow Main Channel	2009-08-21 15:19:00	Slimy sculpin	20	0.1
Kwethluk	Main channel	Elbow Main Channel	2009-08-21 15:19:00	Slimy sculpin	20	0.1
Kwethluk	Main channel	Elbow Main Channel	2009-08-21 15:19:00	Slimy sculpin	20	0.1
Kwethluk	Main channel	Elbow Main Channel	2009-08-21 15:19:00	Slimy sculpin	20	0.1
Kwethluk	Main channel	Elbow Main Channel	2009-08-21 15:19:00	Slimy sculpin	20	0.1
Kwethluk	Main channel	Elbow Main Channel	2009-08-21 15:19:00	Slimy sculpin	20	0.1
Kwethluk	Main channel	Elbow Main Channel	2009-08-21 15:19:00	Slimy sculpin	20	0.1
Kwethluk	Main channel	Elbow Main Channel	2009-08-21 15:19:00	Slimy sculpin	20	0.1
Kwethluk	Main channel	Elbow Main Channel	2009-08-21 15:19:00	Slimy sculpin	20	0.1
Kwethluk	Main channel	Elbow Main Channel	2009-08-21 15:19:00	Slimy sculpin	20	0.1
Kwethluk	Main channel	Elbow Main Channel	2009-08-21 15:19:00	Slimy sculpin	20	0.1
Kwethluk	Main channel	Elbow Main Channel	2009-08-21 15:19:00	Slimy sculpin	20	0.1
Kwethluk	Main channel	Elbow Main Channel	2009-08-21 15:19:00	Slimy sculpin	20	0.1
Kwethluk	Main channel	Elbow Main Channel	2009-08-21 15:19:00	Slimy sculpin	20	0.1
Kwethluk	Main channel	Elbow Main Channel	2009-08-21 15:19:00	Slimy sculpin	20	0.1
Kwethluk	Main channel	Elbow Main Channel	2009-08-21 15:19:00	Slimy sculpin	20	0.1
Kwethluk	Main channel	Elbow Main Channel	2009-08-21 15:19:00	Slimy sculpin	20	0.1
Kwethluk	Main channel	Elbow Main Channel	2009-08-21 15:19:00	Slimy sculpin	20	0.1
Kwethluk	Main channel	Elbow Main Channel	2009-08-21 15:19:00	Slimy sculpin	20	0.1
Kwethluk	Main channel	Elbow Main Channel	2009-08-21 15:19:00	Slimy sculpin	20	0.1
Kwethluk	Main channel	Elbow Main Channel	2009-08-21 15:19:00	Slimy sculpin	20	0.1
Kwethluk	Main channel	Elbow Main Channel	2009-08-21 15:19:00	Slimy sculpin	20	0.1
Kwethluk	Main channel	Elbow Main Channel	2009-08-21 15:19:00	Slimy sculpin	20	0.1
Kwethluk	Main channel	Elbow Main Channel	2009-08-21 15:19:00	Slimy sculpin	20	0.1
Kwethluk	Main channel	Elbow Main Channel	2009-08-21 15:19:00	Slimy sculpin	20	0.1
Kwethluk	Main channel	Elbow Main Channel	2009-08-21 15:19:00	Slimy sculpin	20	0.1
Kwethluk	Main channel	Elbow Main Channel	2009-08-21 15:19:00	Slimy sculpin	20	0.1
Kwethluk	Main channel	Elbow Main Channel	2009-08-21 15:19:00	Slimy sculpin	20	0.1
Kwethluk	Main channel	Elbow Main Channel	2009-08-21 15:19:00	Slimy sculpin	20	0.1
Kwethluk	Main channel	Elbow Main Channel	2009-08-21 15:19:00	Slimy sculpin	20	0.1
Kwethluk	Main channel	Elbow Main Channel	2009-08-21 15:19:00	Slimy sculpin	20	0.1
Kwethluk	Main channel	Elbow Main Channel	2009-08-21 15:19:00	Slimy sculpin	20	0.1
Kwethluk	Main channel	Elbow Main Channel	2009-08-21 15:19:00	Slimy sculpin	20	0.1
Kwethluk	Main channel	Elbow Main Channel	2009-08-21 15:19:00	Slimy sculpin	20	0.1
Kwethluk	Main channel	Elbow Main Channel	2009-08-21 15:19:00	Slimy sculpin	20	0.1
Kwethluk	Main channel	Elbow Main Channel	2009-08-21 15:19:00	Slimy sculpin	20	0.1
Kwethluk	Main channel	Elbow Main Channel	2009-08-21 15:19:00	Slimy sculpin	20	0.1
Kwethluk	Main channel	Elbow Main Channel	2009-08-21 15:19:00	Slimy sculpin	20	0.1
Kwethluk	Main channel	Elbow Main Channel	2009-08-21 15:19:00	Slimy sculpin	20	0.1
Kwethluk	Main channel	Elbow Main Channel	2009-08-21 15:19:00	Slimy sculpin	20	0.1
Kwethluk	Main channel	Elbow Main Channel	2009-08-21 15:19:00	Slimy sculpin	20	0.1
Kwethluk	Main channel	Elbow Main Channel	2009-08-21 15:19:00	Slimy sculpin	20	0.1
Kwethluk	Main channel	Elbow Main Channel	2009-08-21 15:19:00	Slimy sculpin	20	0.1
Kwethluk	Main channel	Elbow Main Channel	2009-08-21 15:19:00	Slimy sculpin	20	0.1
Kwethluk	Main channel	Elbow Main Channel	2009-08-21 15:19:00	Slimy sculpin	20	0.1
Kwethluk	Main channel	Elbow Main Channel	2009-08-21 15:19:00	Slimy sculpin	20	0.1
Kwethluk	Main channel	Elbow Main Channel	2009-08-21 15:19:00	Slimy sculpin	20	0.1
Kwethluk	Main channel	Elbow Main Channel	2009-08-21 15:19:00	Slimy sculpin	20	0.1
Kwethluk	Main channel	Elbow Main Channel	2009-08-21 15:19:00	Slimy sculpin	20	0.1
Kwethluk	Main channel	Elbow Main Channel	2009-08-21 15:19:00	Slimy sculpin	20	0.1
Kwethluk	Main channel	Elbow Main Channel	2009-08-21 15:19:00	Slimy sculpin	20	0.1
Kwethluk	Main channel	Elbow Main Channel	2009-08-21 15:19:00	Slimy sculpin	20	0.1
Kwethluk	Main channel	Elbow Main Channel	2009-08-21 15:19:00	Slimy sculpin	20	0.1
Kwethluk	Main channel	Elbow Main Channel	2009-08-21 15:19:00	Slimy sculpin	20	0.1
Kwethluk	Main channel	Elbow Main Channel	2009-08-21 15:19:00	Slimy sculpin	20	0.1
Kwethluk	Main channel	Elbow Main Channel	2009-08-21 15:19:00	Slimy sculpin	20	0.1
Kwethluk	Main channel	Elbow Main Channel	2009-08-21 15:19:00	Slimy sculpin	20	0.1
Kwethluk	Main channel	Elbow Main Channel	2009-08-21 15:19:00	Slimy sculpin	20	0.1
Kwethluk	Main channel	Elbow Main Channel	2009-08-21 15:19:00	Slimy sculpin	20	0.1
Kwethluk	Main channel	Elbow Main Channel	2009-08-21 15:19:00	Slimy sculpin	20	0.1
Kwethluk	Main channel	Elbow Main Channel	2009-08-21 15:19:00	Slimy sculpin	20	0.1
Kwethluk	Main channel	Elbow Main Channel	2009-08-21 15:19:00	Slimy sculpin	20	0.1
Kwethluk	Main channel	Elbow Main Channel	2009-08-21 15:19:00	Slimy sculpin	20	0.1
Kwethluk	Main channel	Elbow Main Channel	2009-08-21 15:19:00	Slimy sculpin	20	0.1
Kwethluk	Main channel	Elbow Main Channel	2009-08-21 15:19:00	Slimy sculpin	20	0.1
Kwethluk	Main channel	Elbow Main Channel	2009-08-21 15:19:00	Slimy sculpin	20	0.1
Kwethluk	Main channel	Elbow Main Channel	2009-08-21 15:19:00	Slimy sculpin	20	0.1
Kwethluk	Main channel	Elbow Main Channel	2009-08-21 15:19:00	Slimy sculpin	20	0.1
Kwethluk	Main channel	Elbow Main Channel	2009-08-21 15:19:00	Slimy sculpin	75	4.4
Kwethluk	Main channel	Elbow Main Channel	2009-08-21 15:19:00	Slimy sculpin	45	0.9
Kwethluk	Main channel	Elbow Main Channel	2009-08-21 15:19:00	Slimy sculpin	20	0.1
Kwethluk	Main channel	Elbow Main Channel	2009-08-21 15:19:00	Slimy sculpin	20	0.1
Kwethluk	Main channel	Elbow Main Channel	2009-08-21 15:19:00	Slimy sculpin	20	0.1
Kwethluk	Main channel	Elbow Main Channel	2009-08-21 15:19:00	Slimy sculpin	20	0.1
Kwethluk	Main channel	Elbow Main Channel	2009-08-21 15:19:00	Slimy sculpin	20	0.1
Kwethluk	Main channel	Elbow Main Channel	2009-08-21 15:19:00	Slimy sculpin	20	0.1
Kwethluk	Main channel	Elbow Main Channel	2009-08-21 15:19:00	Slimy sculpin	20	0.1
Kwethluk	Main channel	Elbow Main Channel	2009-08-21 15:19:00	Slimy sculpin	20	0.1
Kwethluk	Main channel	Elbow Main Channel	2009-08-21 15:19:00	Slimy sculpin	73	4.3
Kwethluk	Main channel	Elbow Main Channel	2009-08-21 15:19:00	Slimy sculpin	20	0.1
Kwethluk	Main channel	Elbow Main Channel	2009-08-21 15:19:00	Slimy sculpin	20	0.1
Kwethluk	Main channel	Elbow Main Channel	2009-08-21 15:19:00	Slimy sculpin	20	0.1
Kwethluk	Main channel	Elbow Main Channel	2009-08-21 15:19:00	Slimy sculpin	20	0.1
Kwethluk	Main channel	Elbow Main Channel	2009-08-21 15:19:00	Slimy sculpin	20	0.1
Kwethluk	Main channel	Elbow Main Channel	2009-08-21 15:19:00	Slimy sculpin	78	4.9
Kwethluk	Main channel	Elbow Main Channel	2008-08-19 11:31:00	Slimy sculpin	22	0.1
Kwethluk	Main channel	Elbow Main Channel	2008-08-19 11:31:00	Sockeye salmon	57	1.6
Kwethluk	Main channel	Elbow Main Channel	2009-08-21 15:19:00	Steelhead-rainbow	45	0.7
Kwethluk	Main channel	Elbow Main Channel	2009-08-21 15:19:00	Steelhead-rainbow	40	0.3
Kwethluk	Main channel	Elbow Main Channel	2009-08-21 15:19:00	Steelhead-rainbow	51	1.1
Kwethluk	Main channel	Elbow Main Channel	2008-08-19 11:31:00	Steelhead-rainbow	40	0.6
Kwethluk	Main channel	Elbow Main Channel	2008-08-19 11:31:00	Steelhead-rainbow	42	0.7
Kwethluk	Main channel	Elbow Main Channel	2008-08-19 11:31:00	Steelhead-rainbow	31	0.4
Kwethluk	Main channel	Elbow Main Channel	2008-08-19 11:36:00	Steelhead-rainbow	40	0.5
Kwethluk	Main channel	Elbow Main Channel	2008-08-19 11:36:00	Steelhead-rainbow	38	0.6
Kwethluk	Main channel	Elbow Main Channel	2008-08-19 11:36:00	Steelhead-rainbow	40	0.6
Kwethluk	Main channel	Elbow Main Channel	2008-08-19 11:36:00	Steelhead-rainbow	40	0.6
Kwethluk	Main channel	Elbow Main Channel	2008-08-19 11:36:00	Steelhead-rainbow	40	0.7
Kwethluk	Main channel	Elbow Main Channel	2008-08-19 11:36:00	Steelhead-rainbow	39	0.9
Kwethluk	Main channel	Elbow Main Channel	2008-08-19 11:36:00	Steelhead-rainbow	42	0.8
Kwethluk	Main channel	Elbow Main Channel	2008-08-19 11:36:00	Steelhead-rainbow	38	0.7
Kwethluk	Main channel	Elbow Main Channel	2008-08-19 11:36:00	Steelhead-rainbow	38	0.4
Kwethluk	Main channel	Elbow Main Channel	2008-08-19 11:36:00	Steelhead-rainbow	39	0.6
Kwethluk	Main channel	Elbow Main Channel	2008-06-29 12:05:00	Steelhead-rainbow	68	3
Kwethluk	Main channel	Elbow Main Channel	2008-09-05 12:18:00	Steelhead-rainbow	38	0.5
Kwethluk	Main channel	Elbow Main Channel	2008-09-05 12:18:00	Steelhead-rainbow	42	0.6
Kwethluk	Main channel	Elbow Main Channel	2008-09-05 12:18:00	Steelhead-rainbow	44	0.8
Kwethluk	Main channel	Elbow Main Channel	2008-09-05 12:18:00	Steelhead-rainbow	49	0.8
Kwethluk	Main channel	Elbow Main Channel	2008-09-05 12:18:00	Steelhead-rainbow	42	1
Kwethluk	Main channel	Elbow Main Channel	2008-09-05 12:18:00	Steelhead-rainbow	36	0.5
Kwethluk	Main channel	Elbow Main Channel	2008-08-19 11:36:00	Steelhead-rainbow	41	0.8
Kwethluk	Main channel	Elbow Main Channel	2008-08-19 11:36:00	Steelhead-rainbow	28	0.2
Kwethluk	Main channel	Elbow Main Channel	2008-08-19 11:36:00	Steelhead-rainbow	42	0.7
Kwethluk	Main channel	Elbow Main Channel	2008-08-19 11:36:00	Steelhead-rainbow	36	0.5
Kwethluk	Main channel	Elbow Main Channel	2008-08-19 11:36:00	Steelhead-rainbow	38	0.5
Kwethluk	Main channel	Elbow Main Channel	2008-08-19 11:36:00	Steelhead-rainbow	40	0.5
Kwethluk	Main channel	Elbow Main Channel	2008-08-19 11:36:00	Steelhead-rainbow	34	0.5
Kwethluk	Main channel	Elbow Main Channel	2008-08-19 11:36:00	Steelhead-rainbow	35	0.5
Kwethluk	Main channel	Elbow Main Channel	2008-08-19 11:36:00	Steelhead-rainbow	40	0.6
Kwethluk	Main channel	Elbow Main Channel	2008-08-19 11:36:00	Steelhead-rainbow	38	0.3
Kwethluk	Main channel	Elbow Main Channel	2008-08-19 11:36:00	Steelhead-rainbow	35	0.5
Kwethluk	Main channel	Elbow Main Channel	2008-08-19 11:36:00	Steelhead-rainbow	38	0.6
Kwethluk	Main channel	Elbow Main Channel	2008-08-19 11:36:00	Steelhead-rainbow	44	0.8
Kwethluk	Main channel	Elbow Main Channel	2008-08-19 11:36:00	Steelhead-rainbow	44	0.6
Kwethluk	Main channel	Elbow Main Channel	2008-08-19 11:36:00	Steelhead-rainbow	27	0.4
Kwethluk	Main channel	Elbow Main Channel	2008-08-19 11:36:00	Steelhead-rainbow	46	0.7
Kwethluk	Main channel	Elbow Main Channel	2008-08-19 11:36:00	Steelhead-rainbow	34	0.3
Kwethluk	Main channel	Elbow Main Channel	2008-08-19 11:36:00	Steelhead-rainbow	46	0.7
Kwethluk	Main channel	Elbow Main Channel	2008-08-19 11:36:00	Steelhead-rainbow	39	0.6
Kwethluk	Main channel	Elbow Main Channel	2008-08-19 11:36:00	Steelhead-rainbow	44	0.7
Kwethluk	Main channel	Elbow Main Channel	2008-08-19 11:36:00	Steelhead-rainbow	44	1
Kwethluk	Main channel	Elbow Main Channel	2008-08-19 11:36:00	Steelhead-rainbow	37	0.7
Kwethluk	Main channel	Elbow Main Channel	2008-08-19 11:36:00	Steelhead-rainbow	35	0.4
Kwethluk	Main channel	Elbow Main Channel	2008-08-19 11:36:00	Steelhead-rainbow	39	0.9
Kwethluk	Main channel	Elbow Main Channel	2008-08-19 11:36:00	Steelhead-rainbow	38	0.5
Kwethluk	Main channel	Elbow Main Channel	2008-08-19 11:36:00	Steelhead-rainbow	39	0.4
Kwethluk	Main channel	Elbow Main Channel	2008-08-19 11:36:00	Steelhead-rainbow	41	0.6
Kwethluk	Main channel	Elbow Main Channel	2008-08-19 11:36:00	Steelhead-rainbow	42	0.6
Kwethluk	Main channel	Elbow Main Channel	2008-08-19 11:31:00	Steelhead-rainbow	42	0.8
Kwethluk	Main channel	Elbow Main Channel	2008-08-19 11:31:00	Steelhead-rainbow	30	0.2
Kwethluk	Main channel	Elbow Main Channel	2008-08-19 11:31:00	Steelhead-rainbow	34	0.4
Kwethluk	Main channel	Elbow Main Channel	2008-08-19 11:31:00	Steelhead-rainbow	36	0.4
Kwethluk	Main channel	Elbow Main Channel	2008-08-19 11:31:00	Steelhead-rainbow	35	0.4
Kwethluk	Main channel	Elbow Main Channel	2008-08-19 11:31:00	Steelhead-rainbow	41	0.6
Kwethluk	Main channel	Elbow Main Channel	2008-08-19 11:31:00	Steelhead-rainbow	42	0.9
Kwethluk	Main channel	Elbow Main Channel	2008-08-19 11:31:00	Steelhead-rainbow	43	0.5
Kwethluk	Main channel	Elbow Main Channel	2008-08-19 11:31:00	Steelhead-rainbow	47	0.9
Kwethluk	Main channel	Elbow Main Channel	2008-08-19 11:31:00	Steelhead-rainbow	35	0.6
Kwethluk	Main channel	Elbow Main Channel	2008-08-19 11:31:00	Steelhead-rainbow	42	0.8
Kwethluk	Main channel	Elbow Main Channel	2008-08-19 11:31:00	Steelhead-rainbow	42	0.7
Kwethluk	Main channel	Fox Club	2008-09-13 10:20:00	Chinook salmon	55	2
Kwethluk	Main channel	Fox Club	2008-06-21 09:27:00	Chinook salmon	38	0.3
Kwethluk	Main channel	Fox Club	2008-06-21 09:27:00	Chinook salmon	39	0.4
Kwethluk	Main channel	Fox Club	2008-06-21 09:27:00	Chinook salmon	39	0.2
Kwethluk	Main channel	Fox Club	2008-06-21 09:27:00	Chinook salmon	36	0.3
Kwethluk	Main channel	Fox Club	2008-06-21 09:27:00	Chinook salmon	34	0.4
Kwethluk	Main channel	Fox Club	2008-06-21 09:27:00	Chinook salmon	35	0.3
Kwethluk	Main channel	Fox Club	2008-06-21 09:27:00	Chinook salmon	39	0.4
Kwethluk	Main channel	Fox Club	2008-06-21 09:27:00	Chinook salmon	39	0.4
Kwethluk	Main channel	Fox Club	2008-06-21 09:27:00	Chinook salmon	36	0.3
Kwethluk	Main channel	Fox Club	2008-06-21 09:27:00	Chinook salmon	37	0.4
Kwethluk	Main channel	Fox Club	2008-06-21 09:27:00	Chinook salmon	37	0.5
Kwethluk	Main channel	Fox Club	2008-06-21 09:27:00	Chinook salmon	40	0.3
Kwethluk	Main channel	Fox Club	2008-06-21 09:27:00	Chinook salmon	40	0.4
Kwethluk	Main channel	Fox Club	2008-06-21 09:27:00	Chinook salmon	36	0.5
Kwethluk	Main channel	Fox Club	2008-06-21 09:27:00	Chinook salmon	41	0.4
Kwethluk	Main channel	Fox Club	2008-06-21 09:27:00	Chinook salmon	39	0.3
Kwethluk	Main channel	Fox Club	2008-06-21 09:27:00	Coho Salmon	32	0.4
Kwethluk	Main channel	Fox Club	2008-06-21 09:27:00	Coho Salmon	34	0.3
Kwethluk	Main channel	Fox Club	2008-06-21 09:27:00	Coho Salmon	35	0.1
Kwethluk	Main channel	Fox Club	2008-06-21 09:27:00	Coho Salmon	30	0.2
Kwethluk	Main channel	Fox Club	2008-06-21 09:27:00	Coho Salmon	32	0.2
Kwethluk	Main channel	Fox Club	2008-06-21 09:27:00	Coho Salmon	34	0.2
Kwethluk	Main channel	Fox Club	2008-06-21 09:27:00	Coho Salmon	34	0.2
Kwethluk	Main channel	Fox Club	2008-09-13 10:20:00	Dolly Varden char	47	1.1
Kwethluk	Main channel	Fox Club	2008-09-13 10:20:00	Dolly Varden char	42	0.7
Kwethluk	Main channel	Fox Club	2008-09-13 10:20:00	Dolly Varden char	49	1.1
Kwethluk	Main channel	Fox Club	2008-09-13 10:20:00	Dolly Varden char	51	1
Kwethluk	Main channel	Fox Club	2008-09-13 10:20:00	Dolly Varden char	52	0.9
Kwethluk	Main channel	Fox Club	2008-09-13 10:20:00	Dolly Varden char	39	0.7
Kwethluk	Main channel	Fox Club	2008-09-13 10:20:00	Dolly Varden char	45	0.7
Kwethluk	Main channel	Fox Club	2008-09-13 10:20:00	Dolly Varden char	44	0.6
Kwethluk	Main channel	Fox Club	2008-09-13 10:20:00	Dolly Varden char	41	0.6
Kwethluk	Main channel	Fox Club	2008-09-13 10:20:00	Dolly Varden char	54	1.3
Kwethluk	Main channel	Fox Club	2008-09-13 10:20:00	Dolly Varden char	47	1
Kwethluk	Main channel	Fox Club	2008-09-13 10:20:00	Dolly Varden char	42	0.6
Kwethluk	Main channel	Fox Club	2008-06-21 09:27:00	Dolly Varden char	28	0.2
Kwethluk	Main channel	Fox Club	2008-09-13 10:20:00	Dolly Varden char	62	1.9
Kwethluk	Main channel	Fox Club	2008-09-13 10:20:00	Dolly Varden char	44	0.7
Kwethluk	Main channel	Fox Club	2008-06-21 09:27:00	Slimy sculpin	35	0.4
Kwethluk	Main channel	Fox Club	2008-06-21 09:27:00	Slimy sculpin	44	0.8
Kwethluk	Main channel	Fox Club	2008-06-21 09:27:00	Slimy sculpin	40	0.8
Kwethluk	Main channel	Fox Club	2008-06-21 09:27:00	Slimy sculpin	36	0.6
Kwethluk	Main channel	Fox Club	2008-06-21 09:27:00	Slimy sculpin	25	0.1
Kwethluk	Main channel	Fox Club	2008-06-21 09:27:00	Slimy sculpin	38	0.5
Kwethluk	Main channel	Fox Club	2008-06-21 09:27:00	Slimy sculpin	41	0.7
Kwethluk	Main channel	Fox Club	2008-06-21 09:27:00	Slimy sculpin	22	0.1
Kwethluk	Main channel	Fox Club	2008-06-21 09:27:00	Slimy sculpin	25	0.1
Kwethluk	Main channel	Fox Club	2008-06-21 09:27:00	Slimy sculpin	25	0.1
Kwethluk	Main channel	Fox Club	2008-06-21 09:27:00	Slimy sculpin	20	0.1
Kwethluk	Main channel	Fox Club	2008-06-21 09:27:00	Slimy sculpin	23	0.1
Kwethluk	Main channel	Fox Club	2008-06-21 09:27:00	Slimy sculpin	24	0.1
Kwethluk	Main channel	Fox Club	2008-06-21 09:27:00	Slimy sculpin	24	0.1
Kwethluk	Main channel	Fox Club	2008-06-21 09:27:00	Slimy sculpin	40	0.7
Kwethluk	Main channel	Fox Club	2008-06-21 09:27:00	Slimy sculpin	40	0.7
Kwethluk	Main channel	Fox Club	2008-06-21 09:27:00	Slimy sculpin	26	0.1
Kwethluk	Main channel	Fox Club	2008-06-21 09:27:00	Slimy sculpin	36	0.3
Kwethluk	Main channel	Fox Club	2008-06-21 09:27:00	Slimy sculpin	21	0.1
Kwethluk	Main channel	Fox Club	2008-06-21 09:27:00	Slimy sculpin	24	0.1
Kwethluk	Main channel	Fox Club	2008-06-21 09:27:00	Slimy sculpin	27	0.1
Kwethluk	Main channel	Fox Club	2008-06-21 09:27:00	Slimy sculpin	22	0.1
Kwethluk	Main channel	Fox Club	2008-06-21 09:27:00	Slimy sculpin	49	0.8
Kwethluk	Main channel	Fox Club	2008-06-21 09:27:00	Slimy sculpin	35	0.4
Kwethluk	Main channel	Fox Club	2008-09-13 10:20:00	Slimy sculpin	20	0.1
Kwethluk	Main channel	Fox Club	2008-09-13 10:20:00	Slimy sculpin	24	0.2
Kwethluk	Main channel	Fox Club	2008-09-13 10:20:00	Slimy sculpin	20	0.1
Kwethluk	Main channel	Fox Club	2008-09-13 10:20:00	Slimy sculpin	21	0.2
Kwethluk	Main channel	Fox Club	2008-09-13 10:20:00	Slimy sculpin	19	0.1
Kwethluk	Main channel	Fox Club	2008-09-13 10:20:00	Slimy sculpin	16	0.1
Kwethluk	Main channel	Fox Club	2008-09-13 10:20:00	Slimy sculpin	41	0.5
Kwethluk	Main channel	Fox Club	2008-09-13 10:20:00	Slimy sculpin	16	0.1
Kwethluk	Main channel	Fox Club	2008-09-13 10:20:00	Slimy sculpin	19	0.1
Kwethluk	Main channel	Fox Club	2008-09-13 10:20:00	Slimy sculpin	20	0.1
Kwethluk	Main channel	Fox Club	2008-09-13 10:20:00	Slimy sculpin	17	0.1
Kwethluk	Main channel	Fox Club	2008-09-13 10:20:00	Slimy sculpin	20	0.1
Kwethluk	Main channel	Fox Club	2008-09-13 10:20:00	Slimy sculpin	41	0.6
Kwethluk	Main channel	Fox Club	2008-09-13 10:20:00	Slimy sculpin	13	0.1
Kwethluk	Main channel	Fox Club	2008-09-13 10:20:00	Slimy sculpin	46	0.7
Kwethluk	Main channel	Fox Club	2008-09-13 10:20:00	Slimy sculpin	14	0.1
Kwethluk	Main channel	Fox Club	2008-09-13 10:20:00	Slimy sculpin	15	0.1
Kwethluk	Main channel	Fox Club	2008-09-13 10:20:00	Slimy sculpin	16	0.1
Kwethluk	Main channel	Fox Club	2008-09-13 10:20:00	Slimy sculpin	21	0.2
Kwethluk	Main channel	Fox Club	2008-09-13 10:20:00	Slimy sculpin	17	0.1
Kwethluk	Main channel	Fox Club	2008-09-13 10:20:00	Slimy sculpin	17	0.1
Kwethluk	Main channel	Fox Club	2008-09-13 10:20:00	Slimy sculpin	16	0.1
Kwethluk	Main channel	Fox Club	2008-09-13 10:20:00	Slimy sculpin	21	0.1
Kwethluk	Main channel	Fox Club	2008-09-13 10:20:00	Slimy sculpin	19	0.1
Kwethluk	Main channel	Fox Club	2008-09-13 10:20:00	Slimy sculpin	19	0.1
Kwethluk	Main channel	Fox Club	2008-09-13 10:20:00	Slimy sculpin	20	0.1
Kwethluk	Main channel	Fox Club	2008-09-13 10:20:00	Slimy sculpin	16	0.1
Kwethluk	Main channel	Fox Club	2008-09-13 10:20:00	Slimy sculpin	19	0.1
Kwethluk	Main channel	Fox Club	2008-09-13 10:20:00	Slimy sculpin	18	0.1
Kwethluk	Main channel	Fox Club	2008-09-13 10:20:00	Slimy sculpin	17	0.1
Kwethluk	Main channel	Fox Club	2008-09-13 10:20:00	Slimy sculpin	14	0.1
Kwethluk	Main channel	Fox Club	2008-09-13 10:20:00	Slimy sculpin	17	0.1
Kwethluk	Main channel	Fox Club	2008-09-13 10:20:00	Slimy sculpin	17	0.1
Kwethluk	Main channel	Fox Club	2008-09-13 10:20:00	Slimy sculpin	17	0.1
Kwethluk	Main channel	Fox Club	2008-09-13 10:20:00	Slimy sculpin	22	0.1
Kwethluk	Main channel	Fox Club	2008-09-13 10:20:00	Slimy sculpin	21	0.1
Kwethluk	Main channel	Fox Club	2008-09-13 10:20:00	Slimy sculpin	41	0.8
Kwethluk	Main channel	Fox Club	2008-09-13 10:20:00	Slimy sculpin	37	0.4
Kwethluk	Main channel	Fox Club	2008-09-13 10:20:00	Slimy sculpin	51	1
Kwethluk	Main channel	Fox Club	2008-09-13 10:20:00	Slimy sculpin	14	0.1
Kwethluk	Main channel	Fox Club	2008-09-13 10:20:00	Slimy sculpin	21	0.1
Kwethluk	Main channel	Fox Club	2008-09-13 10:20:00	Slimy sculpin	15	0.1
Kwethluk	Main channel	Fox Club	2008-09-13 10:20:00	Slimy sculpin	39	0.5
Kwethluk	Main channel	Fox Club	2008-09-13 10:20:00	Slimy sculpin	16	0.1
Kwethluk	Main channel	Fox Club	2008-09-13 10:20:00	Slimy sculpin	39	0.5
Kwethluk	Main channel	Fox Club	2008-09-13 10:20:00	Slimy sculpin	39	0.5
Kwethluk	Main channel	Fox Club	2008-09-13 10:20:00	Slimy sculpin	14	0.1
Kwethluk	Main channel	Fox Club	2008-09-13 10:20:00	Slimy sculpin	39	0.5
Kwethluk	Main channel	Fox Club	2008-09-13 10:20:00	Slimy sculpin	25	0.2
Kwethluk	Main channel	Fox Club	2008-09-13 10:20:00	Slimy sculpin	19	0.1
Kwethluk	Main channel	Fox Club	2008-09-13 10:20:00	Slimy sculpin	18	0.1
Kwethluk	Main channel	Fox Club	2008-09-13 10:20:00	Slimy sculpin	18	0.1
Kwethluk	Main channel	Fox Club	2008-09-13 10:20:00	Slimy sculpin	20	0.1
Kwethluk	Main channel	Fox Club	2008-09-13 10:20:00	Slimy sculpin	21	0.1
Kwethluk	Main channel	Fox Club	2008-09-13 10:20:00	Slimy sculpin	19	0.1
Kwethluk	Main channel	Fox Club	2008-09-13 10:20:00	Slimy sculpin	14	0.1
Kwethluk	Main channel	Fox Club	2008-09-13 10:20:00	Slimy sculpin	42	0.6
Kwethluk	Main channel	Fox Club	2008-09-13 10:20:00	Slimy sculpin	16	0.1
Kwethluk	Main channel	Fox Club	2008-09-13 10:20:00	Slimy sculpin	19	0.1
Kwethluk	Main channel	Fox Club	2008-09-13 10:20:00	Slimy sculpin	17	0.1
Kwethluk	Main channel	Fox Club	2008-09-13 10:20:00	Slimy sculpin	19	0.1
Kwethluk	Main channel	Fox Club	2008-09-13 10:20:00	Slimy sculpin	19	0.1
Kwethluk	Main channel	Fox Club	2008-09-13 10:20:00	Slimy sculpin	17	0.1
Kwethluk	Main channel	Fox Club	2008-09-13 10:20:00	Slimy sculpin	18	0.1
Kwethluk	Main channel	Fox Club	2008-09-13 10:20:00	Slimy sculpin	17	0.1
Kwethluk	Main channel	Fox Club	2008-09-13 10:20:00	Slimy sculpin	17	0.1
Kwethluk	Main channel	Fox Club	2008-09-13 10:20:00	Slimy sculpin	31	0.2
Kwethluk	Main channel	Fox Club	2008-09-13 10:20:00	Slimy sculpin	34	0.3
Kwethluk	Main channel	Fox Club	2008-09-13 10:20:00	Slimy sculpin	37	0.5
Kwethluk	Main channel	Fox Club	2008-09-13 10:20:00	Slimy sculpin	20	0.1
Kwethluk	Main channel	Fox Club	2008-09-13 10:20:00	Slimy sculpin	15	0.1
Kwethluk	Main channel	Fox Club	2008-09-13 10:20:00	Slimy sculpin	18	0.1
Kwethluk	Main channel	Fox Club	2008-09-13 10:20:00	Slimy sculpin	21	0.2
Kwethluk	Main channel	Fox Club	2008-09-13 10:20:00	Slimy sculpin	14	0.1
Kwethluk	Main channel	Fox Club	2008-09-13 10:20:00	Slimy sculpin	19	0.1
Kwethluk	Main channel	Fox Club	2008-09-13 10:20:00	Slimy sculpin	19	0.1
Kwethluk	Main channel	Fox Club	2008-09-13 10:20:00	Slimy sculpin	17	0.1
Kwethluk	Main channel	Fox Club	2008-09-13 10:20:00	Slimy sculpin	19	0.1
Kwethluk	Main channel	Fox Club	2008-09-13 10:20:00	Slimy sculpin	16	0.1
Kwethluk	Main channel	Fox Club	2008-09-13 10:20:00	Slimy sculpin	35	0.4
Kwethluk	Main channel	Fox Club	2008-09-13 10:20:00	Slimy sculpin	19	0.1
Kwethluk	Main channel	Fox Club	2008-09-13 10:20:00	Slimy sculpin	18	0.1
Kwethluk	Main channel	Fox Club	2008-09-13 10:20:00	Slimy sculpin	16	0.1
Kwethluk	Main channel	Fox Club	2008-09-13 10:20:00	Slimy sculpin	17	0.1
Kwethluk	Main channel	Fox Club	2008-09-13 10:20:00	Slimy sculpin	17	0.1
Kwethluk	Main channel	Fox Club	2008-09-13 10:20:00	Slimy sculpin	17	0.1
Kwethluk	Main channel	Fox Club	2008-09-13 10:20:00	Slimy sculpin	17	0.1
Kwethluk	Main channel	Fox Club	2008-09-13 10:20:00	Slimy sculpin	21	0.2
Kwethluk	Main channel	Fox Club	2008-09-13 10:20:00	Slimy sculpin	16	0.1
Kwethluk	Main channel	Fox Club	2008-09-13 10:20:00	Slimy sculpin	16	0.1
Kwethluk	Main channel	Fox Club	2008-09-13 10:20:00	Slimy sculpin	19	0.1
Kwethluk	Main channel	Fox Club	2008-09-13 10:20:00	Slimy sculpin	20	0.2
Kwethluk	Main channel	Fox Club	2008-09-13 10:20:00	Slimy sculpin	16	0.1
Kwethluk	Main channel	Fox Club	2008-09-13 10:20:00	Slimy sculpin	14	0.1
Kwethluk	Main channel	Fox Club	2008-09-13 10:20:00	Slimy sculpin	17	0.1
Kwethluk	Main channel	Fox Club	2008-09-13 10:20:00	Slimy sculpin	16	0.1
Kwethluk	Main channel	Fox Club	2008-09-13 10:20:00	Slimy sculpin	17	0.1
Kwethluk	Main channel	Fox Club	2008-09-13 10:20:00	Slimy sculpin	17	0.1
Kwethluk	Main channel	Fox Club	2008-09-13 10:20:00	Slimy sculpin	16	0.1
Kwethluk	Main channel	Fox Club	2008-06-21 09:27:00	Slimy sculpin	24	0.1
Kwethluk	Main channel	Fox Club	2008-06-21 09:27:00	Slimy sculpin	27	0.1
Kwethluk	Main channel	Fox Club	2008-06-21 09:27:00	Slimy sculpin	28	0.1
Kwethluk	Main channel	Fox Club	2008-06-21 09:27:00	Slimy sculpin	24	0.1
Kwethluk	Main channel	Fox Club	2008-06-21 09:27:00	Slimy sculpin	24	0.1
Kwethluk	Main channel	Fox Club	2008-06-21 09:27:00	Slimy sculpin	22	0.1
Kwethluk	Main channel	Fox Club	2008-06-21 09:27:00	Slimy sculpin	21	0.1
Kwethluk	Main channel	Fox Club	2008-06-21 09:27:00	Slimy sculpin	24	0.1
Kwethluk	Main channel	Fox Club	2008-06-21 09:27:00	Slimy sculpin	24	0.1
Kwethluk	Main channel	Fox Club	2008-06-21 09:27:00	Slimy sculpin	21	0.1
Kwethluk	Main channel	Fox Club	2008-06-21 09:27:00	Slimy sculpin	22	0.1
Kwethluk	Main channel	Fox Club	2008-06-21 09:27:00	Slimy sculpin	28	0.1
Kwethluk	Main channel	Fox Club	2008-06-21 09:27:00	Slimy sculpin	21	0.1
Kwethluk	Main channel	Fox Club	2008-06-21 09:27:00	Slimy sculpin	16	0.1
Kwethluk	Main channel	Fox Club	2008-06-21 09:27:00	Slimy sculpin	26	0.1
Kwethluk	Main channel	Fox Club	2008-06-21 09:27:00	Slimy sculpin	22	0.1
Kwethluk	Main channel	Fox Club	2008-06-21 09:27:00	Slimy sculpin	24	0.1
Kwethluk	Main channel	Fox Club	2008-06-21 09:27:00	Slimy sculpin	21	0.1
Kwethluk	Main channel	Fox Club	2008-06-21 09:27:00	Slimy sculpin	24	0.1
Kwethluk	Main channel	Fox Club	2008-06-21 09:27:00	Slimy sculpin	25	0.1
Kwethluk	Main channel	Fox Club	2008-06-21 09:27:00	Slimy sculpin	20	0.1
Kwethluk	Main channel	Fox Club	2008-06-21 09:27:00	Slimy sculpin	24	0.1
Kwethluk	Main channel	Fox Club	2008-06-21 09:27:00	Slimy sculpin	19	0.1
Kwethluk	Main channel	Fox Club	2008-06-21 09:27:00	Slimy sculpin	25	0.1
Kwethluk	Main channel	Fox Club	2008-06-21 09:27:00	Slimy sculpin	24	0.1
Kwethluk	Main channel	Fox Club	2008-06-21 09:27:00	Slimy sculpin	22	0.1
Kwethluk	Main channel	Fox Club	2008-06-21 09:27:00	Slimy sculpin	22	0.1
Kwethluk	Main channel	Fox Club	2008-06-21 09:27:00	Slimy sculpin	24	0.1
Kwethluk	Main channel	Fox Club	2008-06-21 09:27:00	Slimy sculpin	19	0.1
Kwethluk	Main channel	Fox Club	2008-06-21 09:27:00	Slimy sculpin	24	0.1
Kwethluk	Main channel	Fox Club	2008-06-21 09:27:00	Slimy sculpin	24	0.1
Kwethluk	Main channel	Fox Club	2008-06-21 09:27:00	Slimy sculpin	24	0.1
Kwethluk	Main channel	Fox Club	2008-06-21 09:27:00	Slimy sculpin	25	0.1
Kwethluk	Main channel	Fox Club	2008-06-21 09:27:00	Slimy sculpin	22	0.1
Kwethluk	Main channel	Fox Club	2008-06-21 09:27:00	Slimy sculpin	19	0.1
Kwethluk	Main channel	Fox Club	2008-06-21 09:27:00	Slimy sculpin	27	0.1
Kwethluk	Main channel	Fox Club	2008-06-21 09:27:00	Slimy sculpin	24	0.1
Kwethluk	Main channel	Fox Club	2008-06-21 09:27:00	Slimy sculpin	20	0.1
Kwethluk	Main channel	Fox Club	2008-06-21 09:27:00	Slimy sculpin	24	0.1
Kwethluk	Main channel	Fox Club	2008-06-21 09:27:00	Slimy sculpin	21	0.1
Kwethluk	Main channel	Fox Club	2008-06-21 09:27:00	Slimy sculpin	22	0.1
Kwethluk	Main channel	Fox Club	2008-06-21 09:27:00	Slimy sculpin	19	0.1
Kwethluk	Main channel	Fox Club	2008-06-21 09:27:00	Slimy sculpin	21	0.1
Kwethluk	Main channel	Fox Club	2008-09-13 10:20:00	Slimy sculpin	17	0.1
Kwethluk	Main channel	Fox Club	2008-09-13 10:20:00	Slimy sculpin	17	0.1
Kwethluk	Main channel	Fox Club	2008-09-13 10:20:00	Slimy sculpin	16	0.1
Kwethluk	Main channel	Fox Club	2008-06-21 09:27:00	Slimy sculpin	24	0.1
Kwethluk	Main channel	Fox Club	2008-06-21 09:27:00	Slimy sculpin	19	0.1
Kwethluk	Main channel	Fox Club	2008-06-21 09:27:00	Slimy sculpin	21	0.1
Kwethluk	Main channel	Fox Club	2008-06-21 09:27:00	Slimy sculpin	21	0.1
Kwethluk	Main channel	Fox Club	2008-06-21 09:27:00	Slimy sculpin	19	0.1
Kwethluk	Main channel	Fox Club	2008-06-21 09:27:00	Slimy sculpin	21	0.1
Kwethluk	Main channel	Fox Club	2008-06-21 09:27:00	Slimy sculpin	22	0.1
Kwethluk	Main channel	Fox Club	2008-06-21 09:27:00	Slimy sculpin	21	0.1
Kwethluk	Main channel	Fox Club	2008-06-21 09:27:00	Slimy sculpin	25	0.1
Kwethluk	Main channel	Fox Club	2008-06-21 09:27:00	Slimy sculpin	30	0.1
Kwethluk	Main channel	Fox Club	2008-06-21 09:27:00	Slimy sculpin	22	0.1
Kwethluk	Main channel	Fox Club	2008-06-21 09:27:00	Slimy sculpin	25	0.1
Kwethluk	Main channel	Fox Club	2008-06-21 09:27:00	Slimy sculpin	25	0.1
Kwethluk	Main channel	Fox Club	2008-06-21 09:27:00	Slimy sculpin	22	0.1
Kwethluk	Main channel	Fox Club	2008-06-21 09:27:00	Slimy sculpin	24	0.1
Kwethluk	Main channel	Fox Club	2008-06-21 09:27:00	Slimy sculpin	24	0.1
Kwethluk	Main channel	Fox Club	2008-06-21 09:27:00	Slimy sculpin	21	0.1
Kwethluk	Main channel	Fox Club	2008-06-21 09:27:00	Slimy sculpin	21	0.1
Kwethluk	Main channel	Fox Club	2008-06-21 09:27:00	Slimy sculpin	19	0.1
Kwethluk	Main channel	Fox Club	2008-06-21 09:27:00	Slimy sculpin	26	0.1
Kwethluk	Main channel	Fox Club	2008-06-21 09:27:00	Slimy sculpin	18	0.1
Kwethluk	Main channel	Fox Club	2008-06-21 09:27:00	Slimy sculpin	25	0.1
Kwethluk	Main channel	Fox Club	2008-06-21 09:27:00	Slimy sculpin	20	0.1
Kwethluk	Main channel	Fox Club	2008-06-21 09:27:00	Slimy sculpin	25	0.1
Kwethluk	Main channel	Fox Club	2008-06-21 09:27:00	Slimy sculpin	24	0.1
Kwethluk	Main channel	Fox Club	2008-06-21 09:27:00	Slimy sculpin	20	0.1
Kwethluk	Main channel	Fox Club	2008-06-21 09:27:00	Slimy sculpin	21	0.1
Kwethluk	Main channel	Fox Club	2008-06-21 09:27:00	Slimy sculpin	22	0.1
Kwethluk	Main channel	Fox Club	2008-06-21 09:27:00	Slimy sculpin	22	0.1
Kwethluk	Main channel	Fox Club	2008-06-21 09:27:00	Slimy sculpin	22	0.1
Kwethluk	Main channel	Fox Club	2008-06-21 09:27:00	Slimy sculpin	24	0.1
Kwethluk	Main channel	Fox Club	2008-06-21 09:27:00	Slimy sculpin	20	0.1
Kwethluk	Main channel	Fox Club	2008-06-21 09:27:00	Slimy sculpin	18	0.1
Kwethluk	Main channel	Fox Club	2008-06-21 09:27:00	Sockeye salmon	27	0.1
Kwethluk	Main channel	Fox Club	2008-06-21 09:27:00	Sockeye salmon	39	1.2
Kwethluk	Main channel	Grizzly bar	2008-06-20 10:24:00	Coho Salmon	40	0.8
Kwethluk	Main channel	Grizzly bar	2008-06-20 10:24:00	Coho Salmon	39	0.7
Kwethluk	Main channel	Grizzly bar	2008-06-20 10:24:00	Coho Salmon	34	0.2
Kwethluk	Main channel	Grizzly bar	2008-06-20 10:24:00	Coho Salmon	30	0.3
Kwethluk	Main channel	Grizzly bar	2008-06-20 10:24:00	Coho Salmon	31	0.4
Kwethluk	Main channel	Grizzly bar	2008-06-20 10:24:00	Coho Salmon	32	0.5
Kwethluk	Main channel	Grizzly bar	2008-06-20 10:24:00	Coho Salmon	32	0.5
Kwethluk	Main channel	Grizzly bar	2008-06-20 10:24:00	Coho Salmon	35	0.4
Kwethluk	Main channel	Grizzly bar	2008-06-20 10:24:00	Coho Salmon	35	0.3
Kwethluk	Main channel	Grizzly bar	2008-06-20 10:24:00	Coho Salmon	37	0.4
Kwethluk	Main channel	Grizzly bar	2008-06-20 10:24:00	Coho Salmon	35	0.3
Kwethluk	Main channel	Grizzly bar	2008-09-12 10:20:00	Coho Salmon	48	1.6
Kwethluk	Main channel	Grizzly bar	2008-09-12 10:20:00	Coho Salmon	57	1.6
Kwethluk	Main channel	Grizzly bar	2008-09-12 10:20:00	Dolly Varden char	58	1.4
Kwethluk	Main channel	Grizzly bar	2008-09-12 10:20:00	Dolly Varden char	53	1
Kwethluk	Main channel	Grizzly bar	2008-06-20 10:24:00	Dolly Varden char	30	0.1
Kwethluk	Main channel	Grizzly bar	2008-06-20 10:24:00	Dolly Varden char	30	0.1
Kwethluk	Main channel	Grizzly bar	2008-06-20 10:24:00	Dolly Varden char	31	0.2
Kwethluk	Main channel	Grizzly bar	2008-08-08 09:40:00	Dolly Varden char	43	0.7
Kwethluk	Main channel	Grizzly bar	2008-08-08 09:40:00	Dolly Varden char	49	0.9
Kwethluk	Main channel	Grizzly bar	2008-06-20 10:24:00	Dolly Varden char	27	0.2
Kwethluk	Main channel	Grizzly bar	2008-06-20 10:24:00	Dolly Varden char	29	0.1
Kwethluk	Main channel	Grizzly bar	2008-06-20 10:24:00	Dolly Varden char	32	0.2
Kwethluk	Main channel	Grizzly bar	2008-06-20 10:24:00	Sculpin, unspeciated	21	0.1
Kwethluk	Main channel	Grizzly bar	2008-06-20 10:24:00	Sculpin, unspeciated	23	0.2
Kwethluk	Main channel	Grizzly bar	2008-06-20 10:24:00	Sculpin, unspeciated	20	0.1
Kwethluk	Main channel	Grizzly bar	2008-06-20 10:24:00	Sculpin, unspeciated	22	0.1
Kwethluk	Main channel	Grizzly bar	2008-06-20 10:24:00	Sculpin, unspeciated	23	0.1
Kwethluk	Main channel	Grizzly bar	2008-06-20 10:24:00	Sculpin, unspeciated	21	0.1
Kwethluk	Main channel	Grizzly bar	2008-06-20 10:24:00	Sculpin, unspeciated	19	0.1
Kwethluk	Main channel	Grizzly bar	2008-06-20 10:24:00	Sculpin, unspeciated	23	0.1
Kwethluk	Main channel	Grizzly bar	2008-06-20 10:24:00	Sculpin, unspeciated	25	0.2
Kwethluk	Main channel	Grizzly bar	2008-06-20 10:24:00	Sculpin, unspeciated	33	0.3
Kwethluk	Main channel	Grizzly bar	2008-06-20 10:24:00	Sculpin, unspeciated	30	0.3
Kwethluk	Main channel	Grizzly bar	2008-06-20 10:24:00	Sculpin, unspeciated	25	0.2
Kwethluk	Main channel	Grizzly bar	2008-06-20 10:24:00	Sculpin, unspeciated	20	0.1
Kwethluk	Main channel	Grizzly bar	2008-06-20 10:24:00	Sculpin, unspeciated	42	0.7
Kwethluk	Main channel	Grizzly bar	2008-06-20 10:24:00	Sculpin, unspeciated	24	0.2
Kwethluk	Main channel	Grizzly bar	2008-06-20 10:24:00	Sculpin, unspeciated	24	0.1
Kwethluk	Main channel	Grizzly bar	2008-06-20 10:24:00	Sculpin, unspeciated	24	0.1
Kwethluk	Main channel	Grizzly bar	2008-06-20 10:24:00	Sculpin, unspeciated	39	0.5
Kwethluk	Main channel	Grizzly bar	2008-06-20 10:24:00	Sculpin, unspeciated	22	0.2
Kwethluk	Main channel	Grizzly bar	2008-06-20 10:24:00	Sculpin, unspeciated	22	0.2
Kwethluk	Main channel	Grizzly bar	2008-06-20 10:24:00	Sculpin, unspeciated	25	0.1
Kwethluk	Main channel	Grizzly bar	2008-06-20 10:24:00	Sculpin, unspeciated	24	0.2
Kwethluk	Main channel	Grizzly bar	2008-06-20 10:24:00	Sculpin, unspeciated	20	0.1
Kwethluk	Main channel	Grizzly bar	2008-06-20 10:24:00	Sculpin, unspeciated	20	0.1
Kwethluk	Main channel	Grizzly bar	2008-06-20 10:24:00	Sculpin, unspeciated	20	0.1
Kwethluk	Main channel	Grizzly bar	2008-06-20 10:24:00	Sculpin, unspeciated	19	0.1
Kwethluk	Main channel	Grizzly bar	2008-06-20 10:24:00	Sculpin, unspeciated	20	0.1
Kwethluk	Main channel	Grizzly bar	2008-06-20 10:24:00	Sculpin, unspeciated	33	0.2
Kwethluk	Main channel	Grizzly bar	2008-06-20 10:24:00	Sculpin, unspeciated	21	0.1
Kwethluk	Main channel	Grizzly bar	2008-06-20 10:24:00	Sculpin, unspeciated	61	3.3
Kwethluk	Main channel	Grizzly bar	2008-06-20 10:24:00	Sculpin, unspeciated	25	0.2
Kwethluk	Main channel	Grizzly bar	2008-06-20 10:24:00	Sculpin, unspeciated	25	0.1
Kwethluk	Main channel	Grizzly bar	2008-06-20 10:24:00	Sculpin, unspeciated	26	0.1
Kwethluk	Main channel	Grizzly bar	2008-06-20 10:24:00	Sculpin, unspeciated	20	0.1
Kwethluk	Main channel	Grizzly bar	2008-06-20 10:24:00	Sculpin, unspeciated	24	0.3
Kwethluk	Main channel	Grizzly bar	2008-06-20 10:24:00	Sculpin, unspeciated	22	0.2
Kwethluk	Main channel	Grizzly bar	2008-06-20 10:24:00	Sculpin, unspeciated	22	0.2
Kwethluk	Main channel	Grizzly bar	2008-06-20 10:24:00	Sculpin, unspeciated	22	0.2
Kwethluk	Main channel	Grizzly bar	2008-06-20 10:24:00	Sculpin, unspeciated	27	0.3
Kwethluk	Main channel	Grizzly bar	2008-06-20 10:24:00	Sculpin, unspeciated	22	0.1
Kwethluk	Main channel	Grizzly bar	2008-06-20 10:24:00	Sculpin, unspeciated	24	0.2
Kwethluk	Main channel	Grizzly bar	2008-06-20 10:24:00	Sculpin, unspeciated	22	0.1
Kwethluk	Main channel	Grizzly bar	2008-06-20 10:24:00	Sculpin, unspeciated	30	0.2
Kwethluk	Main channel	Grizzly bar	2008-06-20 10:24:00	Sculpin, unspeciated	23	0.2
Kwethluk	Main channel	Grizzly bar	2008-06-20 10:24:00	Sculpin, unspeciated	22	0.1
Kwethluk	Main channel	Grizzly bar	2008-06-20 10:24:00	Sculpin, unspeciated	20	0.1
Kwethluk	Main channel	Grizzly bar	2008-06-20 10:24:00	Sculpin, unspeciated	23	0.2
Kwethluk	Main channel	Grizzly bar	2008-08-08 09:40:00	Slimy sculpin	40	0.4
Kwethluk	Main channel	Grizzly bar	2008-08-08 09:40:00	Slimy sculpin	30	0.2
Kwethluk	Main channel	Grizzly bar	2008-08-08 09:40:00	Slimy sculpin	41	0.9
Kwethluk	Main channel	Grizzly bar	2008-08-08 09:40:00	Slimy sculpin	29	0.3
Kwethluk	Main channel	Grizzly bar	2008-08-08 09:40:00	Slimy sculpin	51	1.3
Kwethluk	Main channel	Grizzly bar	2008-08-08 09:40:00	Slimy sculpin	26	0.2
Kwethluk	Main channel	Grizzly bar	2008-08-08 09:40:00	Slimy sculpin	30	0.3
Kwethluk	Main channel	Grizzly bar	2008-08-08 09:40:00	Slimy sculpin	31	0.3
Kwethluk	Main channel	Grizzly bar	2008-08-08 09:40:00	Slimy sculpin	32	0.2
Kwethluk	Main channel	Grizzly bar	2008-08-08 09:40:00	Slimy sculpin	35	0.3
Kwethluk	Main channel	Grizzly bar	2008-08-08 09:40:00	Slimy sculpin	40	0.6
Kwethluk	Main channel	Grizzly bar	2008-08-08 09:40:00	Slimy sculpin	45	0.5
Kwethluk	Main channel	Grizzly bar	2008-08-08 09:40:00	Slimy sculpin	27	0.2
Kwethluk	Main channel	Grizzly bar	2008-08-08 09:40:00	Slimy sculpin	40	0.6
Kwethluk	Main channel	Grizzly bar	2008-08-08 09:40:00	Slimy sculpin	38	0.4
Kwethluk	Main channel	Grizzly bar	2008-08-08 09:40:00	Slimy sculpin	28	0.3
Kwethluk	Main channel	Grizzly bar	2008-08-08 09:40:00	Slimy sculpin	31	0.3
Kwethluk	Main channel	Grizzly bar	2008-08-08 09:40:00	Slimy sculpin	30	0.3
Kwethluk	Main channel	Grizzly bar	2008-08-08 09:40:00	Slimy sculpin	51	1.2
Kwethluk	Main channel	Grizzly bar	2008-08-08 09:40:00	Slimy sculpin	35	0.4
Kwethluk	Main channel	Grizzly bar	2008-08-08 09:40:00	Slimy sculpin	32	0.3
Kwethluk	Main channel	Grizzly bar	2008-08-08 09:40:00	Slimy sculpin	29	0.2
Kwethluk	Main channel	Grizzly bar	2008-08-08 09:40:00	Slimy sculpin	33	0.2
Kwethluk	Main channel	Grizzly bar	2008-08-08 09:40:00	Slimy sculpin	36	0.5
Kwethluk	Main channel	Grizzly bar	2008-08-08 09:40:00	Slimy sculpin	24	0.1
Kwethluk	Main channel	Grizzly bar	2008-08-08 09:40:00	Slimy sculpin	21	0.1
Kwethluk	Main channel	Grizzly bar	2008-08-08 09:40:00	Slimy sculpin	31	0.2
Kwethluk	Main channel	Grizzly bar	2008-08-08 09:40:00	Slimy sculpin	33	0.3
Kwethluk	Main channel	Grizzly bar	2008-08-08 09:40:00	Slimy sculpin	25	0.1
Kwethluk	Main channel	Grizzly bar	2008-08-08 09:40:00	Slimy sculpin	26	0.2
Kwethluk	Main channel	Grizzly bar	2008-08-08 09:40:00	Slimy sculpin	21	0.1
Kwethluk	Main channel	Grizzly bar	2008-09-12 10:20:00	Slimy sculpin	40	0.6
Kwethluk	Main channel	Grizzly bar	2008-09-12 10:20:00	Slimy sculpin	30	0.3
Kwethluk	Main channel	Grizzly bar	2008-09-12 10:20:00	Slimy sculpin	37	0.4
Kwethluk	Main channel	Grizzly bar	2008-09-12 10:20:00	Slimy sculpin	16	0.1
Kwethluk	Main channel	Grizzly bar	2008-09-12 10:20:00	Slimy sculpin	40	0.5
Kwethluk	Main channel	Grizzly bar	2008-09-12 10:20:00	Slimy sculpin	25	0.2
Kwethluk	Main channel	Grizzly bar	2008-09-12 10:20:00	Slimy sculpin	42	0.7
Kwethluk	Main channel	Grizzly bar	2008-09-12 10:20:00	Slimy sculpin	38	0.4
Kwethluk	Main channel	Grizzly bar	2008-09-12 10:20:00	Slimy sculpin	27	0.2
Kwethluk	Main channel	Grizzly bar	2008-09-12 10:20:00	Slimy sculpin	31	0.3
Kwethluk	Main channel	Grizzly bar	2008-09-12 10:20:00	Slimy sculpin	39	0.5
Kwethluk	Main channel	Grizzly bar	2008-09-12 10:20:00	Slimy sculpin	37	0.5
Kwethluk	Main channel	Grizzly bar	2008-09-12 10:20:00	Slimy sculpin	31	0.3
Kwethluk	Main channel	Grizzly bar	2008-09-12 10:20:00	Slimy sculpin	24	0.2
Kwethluk	Main channel	Grizzly bar	2008-09-12 10:20:00	Slimy sculpin	38	0.6
Kwethluk	Main channel	Grizzly bar	2008-09-12 10:20:00	Slimy sculpin	43	0.5
Kwethluk	Main channel	Grizzly bar	2008-09-12 10:20:00	Slimy sculpin	41	0.5
Kwethluk	Main channel	Grizzly bar	2008-09-12 10:20:00	Slimy sculpin	42	0.5
Kwethluk	Main channel	Grizzly bar	2008-09-12 10:20:00	Slimy sculpin	33	0.3
Kwethluk	Main channel	Grizzly bar	2008-09-12 10:20:00	Slimy sculpin	34	0.4
Kwethluk	Main channel	Grizzly bar	2008-09-12 10:20:00	Slimy sculpin	28	0.2
Kwethluk	Main channel	Grizzly bar	2008-09-12 10:20:00	Slimy sculpin	52	1.2
Kwethluk	Main channel	Grizzly bar	2008-09-12 10:20:00	Slimy sculpin	37	0.5
Kwethluk	Main channel	Grizzly bar	2008-09-12 10:20:00	Slimy sculpin	35	0.5
Kwethluk	Main channel	Grizzly bar	2008-09-12 10:20:00	Slimy sculpin	47	0.8
Kwethluk	Main channel	Grizzly bar	2008-09-12 10:20:00	Slimy sculpin	45	0.7
Kwethluk	Main channel	Grizzly bar	2008-09-12 10:20:00	Slimy sculpin	26	0.2
Kwethluk	Main channel	Grizzly bar	2008-06-20 10:24:00	Slimy sculpin	38	0.7
Kwethluk	Main channel	Grizzly bar	2008-06-20 10:24:00	Slimy sculpin	21	0.1
Kwethluk	Main channel	Grizzly bar	2008-06-20 10:24:00	Slimy sculpin	32	0.3
Kwethluk	Main channel	Grizzly bar	2008-06-20 10:24:00	Slimy sculpin	33	0.5
Kwethluk	Main channel	Grizzly bar	2008-06-20 10:24:00	Slimy sculpin	27	0.5
Kwethluk	Main channel	Grizzly bar	2008-06-20 10:24:00	Slimy sculpin	40	0.6
Kwethluk	Main channel	Grizzly bar	2008-06-20 10:24:00	Slimy sculpin	20	0.1
Kwethluk	Main channel	Grizzly bar	2008-06-20 10:24:00	Slimy sculpin	22	0.1
Kwethluk	Main channel	Grizzly bar	2008-06-20 10:24:00	Slimy sculpin	20	0.1
Kwethluk	Main channel	Grizzly bar	2008-06-20 10:24:00	Slimy sculpin	19	0.1
Kwethluk	Main channel	Grizzly bar	2008-06-20 10:24:00	Slimy sculpin	24	0.1
Kwethluk	Main channel	Grizzly bar	2008-06-20 10:24:00	Slimy sculpin	23	0.1
Kwethluk	Main channel	Grizzly bar	2008-06-20 10:24:00	Slimy sculpin	25	0.1
Kwethluk	Main channel	Grizzly bar	2008-06-20 10:24:00	Slimy sculpin	20	0.1
Kwethluk	Main channel	Grizzly bar	2008-06-20 10:24:00	Slimy sculpin	25	0.1
Kwethluk	Main channel	Grizzly bar	2008-06-20 10:24:00	Slimy sculpin	38	0.5
Kwethluk	Main channel	Grizzly bar	2008-06-20 10:24:00	Slimy sculpin	21	0.1
Kwethluk	Main channel	Grizzly bar	2008-06-20 10:24:00	Slimy sculpin	21	0.1
Kwethluk	Main channel	Grizzly bar	2008-06-20 10:24:00	Slimy sculpin	27	0.2
Kwethluk	Main channel	Grizzly bar	2008-06-20 10:24:00	Slimy sculpin	21	0.1
Kwethluk	Main channel	Grizzly bar	2008-06-20 10:24:00	Slimy sculpin	40	0.8
Kwethluk	Main channel	Grizzly bar	2008-06-20 10:24:00	Slimy sculpin	30	0.3
Kwethluk	Main channel	Grizzly bar	2008-06-20 10:24:00	Slimy sculpin	25	0.1
Kwethluk	Main channel	Grizzly bar	2008-06-20 10:24:00	Slimy sculpin	21	0.1
Kwethluk	Main channel	Grizzly bar	2008-06-20 10:24:00	Slimy sculpin	21	0.1
Kwethluk	Main channel	Grizzly bar	2008-06-20 10:24:00	Slimy sculpin	26	0.1
Kwethluk	Main channel	Grizzly bar	2008-06-20 10:24:00	Slimy sculpin	20	0.1
Kwethluk	Main channel	Grizzly bar	2008-06-20 10:24:00	Slimy sculpin	19	0.1
Kwethluk	Main channel	Grizzly bar	2008-06-20 10:24:00	Slimy sculpin	21	0.1
Kwethluk	Main channel	Grizzly bar	2008-06-20 10:24:00	Slimy sculpin	21	0.1
Kwethluk	Main channel	Grizzly bar	2008-06-20 10:24:00	Slimy sculpin	22	0.2
Kwethluk	Main channel	Grizzly bar	2008-06-20 10:24:00	Slimy sculpin	24	0.1
Kwethluk	Main channel	Grizzly bar	2008-06-20 10:24:00	Slimy sculpin	20	0.1
Kwethluk	Main channel	Grizzly bar	2008-06-20 10:24:00	Slimy sculpin	20	0.1
Kwethluk	Main channel	Grizzly bar	2008-06-20 10:24:00	Slimy sculpin	72	3.7
Kwethluk	Main channel	Grizzly bar	2008-06-20 10:24:00	Slimy sculpin	46	1.4
Kwethluk	Main channel	Grizzly bar	2008-06-20 10:24:00	Slimy sculpin	35	0.4
Kwethluk	Main channel	Grizzly bar	2008-08-08 09:40:00	Slimy sculpin	46	1
Kwethluk	Main channel	Grizzly bar	2008-08-08 09:40:00	Slimy sculpin	31	0.3
Kwethluk	Main channel	Grizzly bar	2008-08-08 09:40:00	Slimy sculpin	34	0.4
Kwethluk	Main channel	Grizzly bar	2008-08-08 09:40:00	Slimy sculpin	32	0.5
Kwethluk	Main channel	Grizzly bar	2008-08-08 09:40:00	Slimy sculpin	33	0.4
Kwethluk	Main channel	Grizzly bar	2008-08-08 09:40:00	Slimy sculpin	30	0.2
Kwethluk	Main channel	Grizzly bar	2008-08-08 09:40:00	Slimy sculpin	36	0.6
Kwethluk	Main channel	Grizzly bar	2008-08-08 09:40:00	Slimy sculpin	32	0.3
Kwethluk	Main channel	Grizzly bar	2008-08-08 09:40:00	Slimy sculpin	27	0.2
Kwethluk	Main channel	Grizzly bar	2008-08-08 09:40:00	Slimy sculpin	29	0.1
Kwethluk	Main channel	Grizzly bar	2008-08-08 09:40:00	Slimy sculpin	35	0.3
Kwethluk	Main channel	Grizzly bar	2008-08-08 09:40:00	Slimy sculpin	35	0.3
Kwethluk	Main channel	Grizzly bar	2008-08-08 09:40:00	Slimy sculpin	40	0.6
Kwethluk	Main channel	Grizzly bar	2008-08-08 09:40:00	Slimy sculpin	30	0.1
Kwethluk	Main channel	Grizzly bar	2008-08-08 09:40:00	Slimy sculpin	36	0.4
Kwethluk	Main channel	Grizzly bar	2008-08-08 09:40:00	Slimy sculpin	32	0.4
Kwethluk	Main channel	Grizzly bar	2008-06-20 10:24:00	Sockeye salmon	29	0.1
Kwethluk	Main channel	Kwethluk Boundary	2008-06-18 12:00:00	Chinook salmon	38	0.9
Kwethluk	Main channel	Kwethluk Boundary	2008-08-06 13:30:00	Chinook salmon	45	1
Kwethluk	Main channel	Kwethluk Boundary	2008-08-06 13:30:00	Chinook salmon	40	0.6
Kwethluk	Main channel	Kwethluk Boundary	2008-08-06 13:30:00	Chinook salmon	47	1
Kwethluk	Main channel	Kwethluk Boundary	2008-06-18 12:00:00	Chinook salmon	34	0.2
Kwethluk	Main channel	Kwethluk Boundary	2008-06-18 12:00:00	Chinook salmon	33	0.5
Kwethluk	Main channel	Kwethluk Boundary	2008-06-18 12:00:00	Chinook salmon	36	0.4
Kwethluk	Main channel	Kwethluk Boundary	2008-08-06 13:30:00	Chinook salmon	42	0.8
Kwethluk	Main channel	Kwethluk Boundary	2008-06-18 12:00:00	Coho Salmon	27	0.1
Kwethluk	Main channel	Kwethluk Boundary	2008-06-18 12:00:00	Coho Salmon	37	0.2
Kwethluk	Main channel	Kwethluk Boundary	2008-06-18 12:00:00	Coho Salmon	34	0.3
Kwethluk	Main channel	Kwethluk Boundary	2008-06-18 12:00:00	Coho Salmon	32	0.5
Kwethluk	Main channel	Kwethluk Boundary	2008-06-18 12:00:00	Coho Salmon	32	0.2
Kwethluk	Main channel	Kwethluk Boundary	2008-06-18 12:00:00	Coho Salmon	36	0.4
Kwethluk	Main channel	Kwethluk Boundary	2008-06-18 12:00:00	Coho Salmon	33	0.3
Kwethluk	Main channel	Kwethluk Boundary	2008-06-18 12:00:00	Coho Salmon	31	0.2
Kwethluk	Main channel	Kwethluk Boundary	2008-06-18 12:00:00	Coho Salmon	37	0.3
Kwethluk	Main channel	Kwethluk Boundary	2008-06-18 12:00:00	Coho Salmon	37	0.5
Kwethluk	Main channel	Kwethluk Boundary	2008-06-18 12:00:00	Coho Salmon	32	0.5
Kwethluk	Main channel	Kwethluk Boundary	2008-06-18 12:00:00	Coho Salmon	36	0.3
Kwethluk	Main channel	Kwethluk Boundary	2008-06-18 12:00:00	Coho Salmon	33	0.2
Kwethluk	Main channel	Kwethluk Boundary	2008-06-18 12:00:00	Coho Salmon	34	0.4
Kwethluk	Main channel	Kwethluk Boundary	2008-06-18 12:00:00	Coho Salmon	32	0.4
Kwethluk	Main channel	Kwethluk Boundary	2008-08-06 13:30:00	Coho Salmon	38	0.5
Kwethluk	Main channel	Kwethluk Boundary	2008-08-06 13:30:00	Coho Salmon	45	0.8
Kwethluk	Main channel	Kwethluk Boundary	2008-08-06 13:30:00	Coho Salmon	40	0.7
Kwethluk	Main channel	Kwethluk Boundary	2008-08-06 13:30:00	Coho Salmon	34	0.3
Kwethluk	Main channel	Kwethluk Boundary	2008-06-18 12:00:00	Coho Salmon	31	0.3
Kwethluk	Main channel	Kwethluk Boundary	2008-06-18 12:00:00	Coho Salmon	36	0.4
Kwethluk	Main channel	Kwethluk Boundary	2008-06-18 12:00:00	Coho Salmon	35	0.5
Kwethluk	Main channel	Kwethluk Boundary	2008-06-18 12:00:00	Coho Salmon	36	0.3
Kwethluk	Main channel	Kwethluk Boundary	2008-06-18 12:00:00	Coho Salmon	30	0.1
Kwethluk	Main channel	Kwethluk Boundary	2008-06-18 12:00:00	Dolly Varden char	29	0.1
Kwethluk	Main channel	Kwethluk Boundary	2008-08-06 13:30:00	Dolly Varden char	38	0.6
Kwethluk	Main channel	Kwethluk Boundary	2008-08-06 13:30:00	Dolly Varden char	41	0.6
Kwethluk	Main channel	Kwethluk Boundary	2008-06-18 12:00:00	Dolly Varden char	32	0.1
Kwethluk	Main channel	Kwethluk Boundary	2008-06-18 12:00:00	Dolly Varden char	29	0.2
Kwethluk	Main channel	Kwethluk Boundary	2008-06-18 12:00:00	Dolly Varden char	29	0.1
Kwethluk	Main channel	Kwethluk Boundary	2008-06-18 12:00:00	Dolly Varden char	32	0.2
Kwethluk	Main channel	Kwethluk Boundary	2008-08-06 13:30:00	Dolly Varden char	41	0.4
Kwethluk	Main channel	Kwethluk Boundary	2008-06-18 12:00:00	Dolly Varden char	27	0.1
Kwethluk	Main channel	Kwethluk Boundary	2008-08-06 13:30:00	Dolly Varden char	42	0.8
Kwethluk	Main channel	Kwethluk Boundary	2008-08-06 13:30:00	Dolly Varden char	43	0.8
Kwethluk	Main channel	Kwethluk Boundary	2008-08-06 13:30:00	Dolly Varden char	38	0.4
Kwethluk	Main channel	Kwethluk Boundary	2008-08-06 13:30:00	Dolly Varden char	42	0.7
Kwethluk	Main channel	Kwethluk Boundary	2008-08-06 13:30:00	Dolly Varden char	60	1.7
Kwethluk	Main channel	Kwethluk Boundary	2008-08-06 13:30:00	Dolly Varden char	32	0.3
Kwethluk	Main channel	Kwethluk Boundary	2008-08-06 13:30:00	Dolly Varden char	45	0.7
Kwethluk	Main channel	Kwethluk Boundary	2008-08-06 13:30:00	Dolly Varden char	32	0.4
Kwethluk	Main channel	Kwethluk Boundary	2008-08-06 13:30:00	Dolly Varden char	41	0.3
Kwethluk	Main channel	Kwethluk Boundary	2008-08-06 13:30:00	Dolly Varden char	46	0.7
Kwethluk	Main channel	Kwethluk Boundary	2008-08-06 13:30:00	Dolly Varden char	37	0.4
Kwethluk	Main channel	Kwethluk Boundary	2008-08-06 13:30:00	Dolly Varden char	41	0.9
Kwethluk	Main channel	Kwethluk Boundary	2008-06-18 12:00:00	Dolly Varden char	29	0.2
Kwethluk	Main channel	Kwethluk Boundary	2008-06-18 12:00:00	Dolly Varden char	32	0.1
Kwethluk	Main channel	Kwethluk Boundary	2008-08-06 13:30:00	Dolly Varden char	54	1.5
Kwethluk	Main channel	Kwethluk Boundary	2008-06-18 12:00:00	Dolly Varden char	69	2.9
Kwethluk	Main channel	Kwethluk Boundary	2008-06-18 12:00:00	Dolly Varden char	24	0.3
Kwethluk	Main channel	Kwethluk Boundary	2008-06-18 12:00:00	Dolly Varden char	21	0.1
Kwethluk	Main channel	Kwethluk Boundary	2008-08-06 13:30:00	Dolly Varden char	41	0.6
Kwethluk	Main channel	Kwethluk Boundary	2008-08-06 13:30:00	Dolly Varden char	40	0.5
Kwethluk	Main channel	Kwethluk Boundary	2008-08-06 13:30:00	Dolly Varden char	39	0.4
Kwethluk	Main channel	Kwethluk Boundary	2008-06-18 12:00:00	Sculpin, unspeciated	20	0.1
Kwethluk	Main channel	Kwethluk Boundary	2008-06-18 12:00:00	Sculpin, unspeciated	20	0.1
Kwethluk	Main channel	Kwethluk Boundary	2008-06-18 12:00:00	Sculpin, unspeciated	27	0.3
Kwethluk	Main channel	Kwethluk Boundary	2008-06-18 12:00:00	Sculpin, unspeciated	17	0.1
Kwethluk	Main channel	Kwethluk Boundary	2008-06-18 12:00:00	Sculpin, unspeciated	26	0.5
Kwethluk	Main channel	Kwethluk Boundary	2008-06-18 12:00:00	Sculpin, unspeciated	21	0.1
Kwethluk	Main channel	Kwethluk Boundary	2008-06-18 12:00:00	Sculpin, unspeciated	21	0.1
Kwethluk	Main channel	Kwethluk Boundary	2008-06-18 12:00:00	Sculpin, unspeciated	42	1.1
Kwethluk	Main channel	Kwethluk Boundary	2008-06-18 12:00:00	Sculpin, unspeciated	21	0.1
Kwethluk	Main channel	Kwethluk Boundary	2008-06-18 12:00:00	Sculpin, unspeciated	21	0.1
Kwethluk	Main channel	Kwethluk Boundary	2008-06-18 12:00:00	Sculpin, unspeciated	20	0.1
Kwethluk	Main channel	Kwethluk Boundary	2008-06-18 12:00:00	Sculpin, unspeciated	35	0.3
Kwethluk	Main channel	Kwethluk Boundary	2008-06-18 12:00:00	Sculpin, unspeciated	22	0.1
Kwethluk	Main channel	Kwethluk Boundary	2008-06-18 12:00:00	Sculpin, unspeciated	20	0.1
Kwethluk	Main channel	Kwethluk Boundary	2008-06-18 12:00:00	Sculpin, unspeciated	19	0.1
Kwethluk	Main channel	Kwethluk Boundary	2008-06-18 12:00:00	Sculpin, unspeciated	21	0.1
Kwethluk	Main channel	Kwethluk Boundary	2008-06-18 12:00:00	Sculpin, unspeciated	27	0.2
Kwethluk	Main channel	Kwethluk Boundary	2008-06-18 12:00:00	Sculpin, unspeciated	45	0.9
Kwethluk	Main channel	Kwethluk Boundary	2008-06-18 12:00:00	Sculpin, unspeciated	26	0.1
Kwethluk	Main channel	Kwethluk Boundary	2008-06-18 12:00:00	Sculpin, unspeciated	20	0.1
Kwethluk	Main channel	Kwethluk Boundary	2008-06-18 12:00:00	Sculpin, unspeciated	19	0.1
Kwethluk	Main channel	Kwethluk Boundary	2008-06-18 12:00:00	Sculpin, unspeciated	21	0.1
Kwethluk	Main channel	Kwethluk Boundary	2008-06-18 12:00:00	Sculpin, unspeciated	22	0.2
Kwethluk	Main channel	Kwethluk Boundary	2008-06-18 12:00:00	Sculpin, unspeciated	20	0.1
Kwethluk	Main channel	Kwethluk Boundary	2008-06-18 12:00:00	Sculpin, unspeciated	17	0.1
Kwethluk	Main channel	Kwethluk Boundary	2008-06-18 12:00:00	Sculpin, unspeciated	21	0.1
Kwethluk	Main channel	Kwethluk Boundary	2008-06-18 12:00:00	Sculpin, unspeciated	21	0.1
Kwethluk	Main channel	Kwethluk Boundary	2008-06-18 12:00:00	Sculpin, unspeciated	21	0.1
Kwethluk	Main channel	Kwethluk Boundary	2008-06-18 12:00:00	Sculpin, unspeciated	20	0.1
Kwethluk	Main channel	Kwethluk Boundary	2008-06-18 12:00:00	Sculpin, unspeciated	41	0.7
Kwethluk	Main channel	Kwethluk Boundary	2008-06-18 12:00:00	Sculpin, unspeciated	22	0.2
Kwethluk	Main channel	Kwethluk Boundary	2008-06-18 12:00:00	Sculpin, unspeciated	21	0.1
Kwethluk	Main channel	Kwethluk Boundary	2008-06-18 12:00:00	Sculpin, unspeciated	22	0.2
Kwethluk	Main channel	Kwethluk Boundary	2008-06-18 12:00:00	Sculpin, unspeciated	19	0.1
Kwethluk	Main channel	Kwethluk Boundary	2008-06-18 12:00:00	Sculpin, unspeciated	23	0.2
Kwethluk	Main channel	Kwethluk Boundary	2008-06-18 12:00:00	Sculpin, unspeciated	21	0.2
Kwethluk	Main channel	Kwethluk Boundary	2008-06-18 12:00:00	Sculpin, unspeciated	20	0.1
Kwethluk	Main channel	Kwethluk Boundary	2008-06-18 12:00:00	Sculpin, unspeciated	17	0.1
Kwethluk	Main channel	Kwethluk Boundary	2008-06-18 12:00:00	Sculpin, unspeciated	41	0.9
Kwethluk	Main channel	Kwethluk Boundary	2008-06-18 12:00:00	Sculpin, unspeciated	21	0.1
Kwethluk	Main channel	Kwethluk Boundary	2008-06-18 12:00:00	Slimy sculpin	43	0.8
Kwethluk	Main channel	Kwethluk Boundary	2008-08-06 13:30:00	Slimy sculpin	21	0.1
Kwethluk	Main channel	Kwethluk Boundary	2008-08-06 13:30:00	Slimy sculpin	22	0.1
Kwethluk	Main channel	Kwethluk Boundary	2008-08-06 13:30:00	Slimy sculpin	25	0.1
Kwethluk	Main channel	Kwethluk Boundary	2008-08-06 13:30:00	Slimy sculpin	21	0.1
Kwethluk	Main channel	Kwethluk Boundary	2008-08-06 13:30:00	Slimy sculpin	36	0.5
Kwethluk	Main channel	Kwethluk Boundary	2008-08-06 13:30:00	Slimy sculpin	26	0.2
Kwethluk	Main channel	Kwethluk Boundary	2008-08-06 13:30:00	Slimy sculpin	29	0.4
Kwethluk	Main channel	Kwethluk Boundary	2008-08-06 13:30:00	Slimy sculpin	77	4.7
Kwethluk	Main channel	Kwethluk Boundary	2008-08-06 13:30:00	Slimy sculpin	50	1.2
Kwethluk	Main channel	Kwethluk Boundary	2008-08-06 13:30:00	Slimy sculpin	59	2.2
Kwethluk	Main channel	Kwethluk Boundary	2008-08-06 13:30:00	Slimy sculpin	27	0.4
Kwethluk	Main channel	Kwethluk Boundary	2008-08-06 13:30:00	Slimy sculpin	28	0.3
Kwethluk	Main channel	Kwethluk Boundary	2008-08-06 13:30:00	Slimy sculpin	36	0.4
Kwethluk	Main channel	Kwethluk Boundary	2008-08-06 13:30:00	Slimy sculpin	35	0.4
Kwethluk	Main channel	Kwethluk Boundary	2008-08-06 13:30:00	Slimy sculpin	21	0.2
Kwethluk	Main channel	Kwethluk Boundary	2008-08-06 13:30:00	Slimy sculpin	30	0.3
Kwethluk	Main channel	Kwethluk Boundary	2008-08-06 13:30:00	Slimy sculpin	26	0.3
Kwethluk	Main channel	Kwethluk Boundary	2008-08-06 13:30:00	Slimy sculpin	22	0.1
Kwethluk	Main channel	Kwethluk Boundary	2008-08-06 13:30:00	Slimy sculpin	32	0.6
Kwethluk	Main channel	Kwethluk Boundary	2008-08-06 13:30:00	Slimy sculpin	31	0.2
Kwethluk	Main channel	Kwethluk Boundary	2008-08-06 13:30:00	Slimy sculpin	32	0.3
Kwethluk	Main channel	Kwethluk Boundary	2008-08-06 13:30:00	Slimy sculpin	34	0.3
Kwethluk	Main channel	Kwethluk Boundary	2008-08-06 13:30:00	Slimy sculpin	26	0.2
Kwethluk	Main channel	Kwethluk Boundary	2008-08-06 13:30:00	Slimy sculpin	23	0.1
Kwethluk	Main channel	Kwethluk Boundary	2008-08-06 13:30:00	Slimy sculpin	23	0.1
Kwethluk	Main channel	Kwethluk Boundary	2008-08-06 13:30:00	Slimy sculpin	35	0.4
Kwethluk	Main channel	Kwethluk Boundary	2008-08-06 13:30:00	Slimy sculpin	28	0.2
Kwethluk	Main channel	Kwethluk Boundary	2008-08-06 13:30:00	Slimy sculpin	28	0.2
Kwethluk	Main channel	Kwethluk Boundary	2008-08-06 13:30:00	Slimy sculpin	28	0.2
Kwethluk	Main channel	Kwethluk Boundary	2008-08-06 13:30:00	Slimy sculpin	34	0.4
Kwethluk	Main channel	Kwethluk Boundary	2008-08-06 13:30:00	Slimy sculpin	34	0.5
Kwethluk	Main channel	Kwethluk Boundary	2008-08-06 13:30:00	Slimy sculpin	33	0.3
Kwethluk	Main channel	Kwethluk Boundary	2008-08-06 13:30:00	Slimy sculpin	31	0.3
Kwethluk	Main channel	Kwethluk Boundary	2008-08-06 13:30:00	Slimy sculpin	29	0.2
Kwethluk	Main channel	Kwethluk Boundary	2008-08-06 13:30:00	Slimy sculpin	30	0.2
Kwethluk	Main channel	Kwethluk Boundary	2008-08-06 13:30:00	Slimy sculpin	23	0.1
Kwethluk	Main channel	Kwethluk Boundary	2008-08-06 13:30:00	Slimy sculpin	44	0.9
Kwethluk	Main channel	Kwethluk Boundary	2008-08-06 13:30:00	Slimy sculpin	23	0.1
Kwethluk	Main channel	Kwethluk Boundary	2008-08-06 13:30:00	Slimy sculpin	28	0.4
Kwethluk	Main channel	Kwethluk Boundary	2008-08-06 13:30:00	Slimy sculpin	23	0.1
Kwethluk	Main channel	Kwethluk Boundary	2008-08-06 13:30:00	Slimy sculpin	22	0.1
Kwethluk	Main channel	Kwethluk Boundary	2008-08-06 13:30:00	Slimy sculpin	22	0.1
Kwethluk	Main channel	Kwethluk Boundary	2008-08-06 13:30:00	Slimy sculpin	21	0.1
Kwethluk	Main channel	Kwethluk Boundary	2008-08-06 13:30:00	Slimy sculpin	33	0.4
Kwethluk	Main channel	Kwethluk Boundary	2008-08-06 13:30:00	Slimy sculpin	25	0.2
Kwethluk	Main channel	Kwethluk Boundary	2008-08-06 13:30:00	Slimy sculpin	22	0.1
Kwethluk	Main channel	Kwethluk Boundary	2008-08-06 13:30:00	Slimy sculpin	23	0.1
Kwethluk	Main channel	Kwethluk Boundary	2008-08-06 13:30:00	Slimy sculpin	52	2.1
Kwethluk	Main channel	Kwethluk Boundary	2008-08-06 13:30:00	Slimy sculpin	31	0.3
Kwethluk	Main channel	Kwethluk Boundary	2008-08-06 13:30:00	Slimy sculpin	26	0.2
Kwethluk	Main channel	Kwethluk Boundary	2008-08-06 13:30:00	Slimy sculpin	25	0.2
Kwethluk	Main channel	Kwethluk Boundary	2008-08-06 13:30:00	Slimy sculpin	30	0.4
Kwethluk	Main channel	Kwethluk Boundary	2008-08-06 13:30:00	Slimy sculpin	28	0.2
Kwethluk	Main channel	Kwethluk Boundary	2008-08-06 13:30:00	Slimy sculpin	25	0.2
Kwethluk	Main channel	Kwethluk Boundary	2008-08-06 13:30:00	Slimy sculpin	30	0.3
Kwethluk	Main channel	Kwethluk Boundary	2008-08-06 13:30:00	Slimy sculpin	22	0.1
Kwethluk	Main channel	Kwethluk Boundary	2008-08-06 13:30:00	Slimy sculpin	32	0.7
Kwethluk	Main channel	Kwethluk Boundary	2008-08-06 13:30:00	Slimy sculpin	24	0.1
Kwethluk	Main channel	Kwethluk Boundary	2008-08-06 13:30:00	Slimy sculpin	20	0.1
Kwethluk	Main channel	Kwethluk Boundary	2008-08-06 13:30:00	Slimy sculpin	23	0.1
Kwethluk	Main channel	Kwethluk Boundary	2008-08-06 13:30:00	Slimy sculpin	25	0.2
Kwethluk	Main channel	Kwethluk Boundary	2008-08-06 13:30:00	Slimy sculpin	21	0.1
Kwethluk	Main channel	Kwethluk Boundary	2008-08-06 13:30:00	Slimy sculpin	33	0.3
Kwethluk	Main channel	Kwethluk Boundary	2008-08-06 13:30:00	Slimy sculpin	26	0.2
Kwethluk	Main channel	Kwethluk Boundary	2008-08-06 13:30:00	Slimy sculpin	28	0.2
Kwethluk	Main channel	Kwethluk Boundary	2008-08-06 13:30:00	Slimy sculpin	42	0.7
Kwethluk	Main channel	Kwethluk Boundary	2008-08-06 13:30:00	Slimy sculpin	28	0.2
Kwethluk	Main channel	Kwethluk Boundary	2008-08-06 13:30:00	Slimy sculpin	22	0.1
Kwethluk	Main channel	Kwethluk Boundary	2008-06-18 12:00:00	Slimy sculpin	17	0.1
Kwethluk	Main channel	Kwethluk Boundary	2008-06-18 12:00:00	Slimy sculpin	22	0.1
Kwethluk	Main channel	Kwethluk Boundary	2008-06-18 12:00:00	Slimy sculpin	21	0.1
Kwethluk	Main channel	Kwethluk Boundary	2008-06-18 12:00:00	Slimy sculpin	21	0.1
Kwethluk	Main channel	Kwethluk Boundary	2008-06-18 12:00:00	Slimy sculpin	21	0.1
Kwethluk	Main channel	Kwethluk Boundary	2008-06-18 12:00:00	Slimy sculpin	22	0.1
Kwethluk	Main channel	Kwethluk Boundary	2008-06-18 12:00:00	Slimy sculpin	21	0.1
Kwethluk	Main channel	Kwethluk Boundary	2008-06-18 12:00:00	Slimy sculpin	24	0.2
Kwethluk	Main channel	Kwethluk Boundary	2008-06-18 12:00:00	Slimy sculpin	21	0.1
Kwethluk	Main channel	Kwethluk Boundary	2008-06-18 12:00:00	Slimy sculpin	22	0.1
Kwethluk	Main channel	Kwethluk Boundary	2008-06-18 12:00:00	Slimy sculpin	21	0.1
Kwethluk	Main channel	Kwethluk Boundary	2008-06-18 12:00:00	Slimy sculpin	27	0.1
Kwethluk	Main channel	Kwethluk Boundary	2008-06-18 12:00:00	Slimy sculpin	21	0.1
Kwethluk	Main channel	Kwethluk Boundary	2008-08-06 13:30:00	Slimy sculpin	30	0.4
Kwethluk	Main channel	Kwethluk Boundary	2008-08-06 13:30:00	Slimy sculpin	30	0.4
Kwethluk	Main channel	Kwethluk Boundary	2008-08-06 13:30:00	Slimy sculpin	26	0.2
Kwethluk	Main channel	Kwethluk Boundary	2008-08-06 13:30:00	Slimy sculpin	36	0.6
Kwethluk	Main channel	Kwethluk Boundary	2008-08-06 13:30:00	Slimy sculpin	31	0.3
Kwethluk	Main channel	Kwethluk Boundary	2008-08-06 13:30:00	Slimy sculpin	30	0.3
Kwethluk	Main channel	Kwethluk Boundary	2008-08-06 13:30:00	Slimy sculpin	26	0.2
Kwethluk	Main channel	Kwethluk Boundary	2008-08-06 13:30:00	Slimy sculpin	23	0.1
Kwethluk	Main channel	Kwethluk Boundary	2008-08-06 13:30:00	Slimy sculpin	29	0.2
Kwethluk	Main channel	Kwethluk Boundary	2008-08-06 13:30:00	Slimy sculpin	21	0.1
Kwethluk	Main channel	Kwethluk Boundary	2008-08-06 13:30:00	Slimy sculpin	29	0.2
Kwethluk	Main channel	Kwethluk Boundary	2008-08-06 13:30:00	Slimy sculpin	22	0.1
Kwethluk	Main channel	Kwethluk Boundary	2008-08-06 13:30:00	Slimy sculpin	23	0.1
Kwethluk	Main channel	Kwethluk Boundary	2008-08-06 13:30:00	Slimy sculpin	26	0.2
Kwethluk	Main channel	Kwethluk Boundary	2008-08-06 13:30:00	Slimy sculpin	26	0.2
Kwethluk	Main channel	Kwethluk Boundary	2008-08-06 13:30:00	Slimy sculpin	28	0.2
Kwethluk	Main channel	Kwethluk Boundary	2008-08-06 13:30:00	Slimy sculpin	27	0.2
Kwethluk	Main channel	Kwethluk Boundary	2008-08-06 13:30:00	Slimy sculpin	28	0.2
Kwethluk	Main channel	Kwethluk Boundary	2008-08-06 13:30:00	Slimy sculpin	20	0.1
Kwethluk	Main channel	Kwethluk Boundary	2008-08-06 13:30:00	Slimy sculpin	26	0.2
Kwethluk	Main channel	Kwethluk Boundary	2008-08-06 13:30:00	Slimy sculpin	32	0.3
Kwethluk	Main channel	Kwethluk Boundary	2008-08-06 13:30:00	Slimy sculpin	19	0.1
Kwethluk	Main channel	Kwethluk Boundary	2008-08-06 13:30:00	Slimy sculpin	24	0.1
Kwethluk	Main channel	Kwethluk Boundary	2008-08-06 13:30:00	Slimy sculpin	26	0.2
Kwethluk	Main channel	Kwethluk Boundary	2008-08-06 13:30:00	Slimy sculpin	27	0.2
Kwethluk	Main channel	Kwethluk Boundary	2008-08-06 13:30:00	Slimy sculpin	24	0.1
Kwethluk	Main channel	Kwethluk Boundary	2008-08-06 13:30:00	Slimy sculpin	25	0.3
Kwethluk	Main channel	Kwethluk Boundary	2008-08-06 13:30:00	Slimy sculpin	26	0.2
Kwethluk	Main channel	Kwethluk Boundary	2008-08-06 13:30:00	Slimy sculpin	35	0.3
Kwethluk	Main channel	Kwethluk Boundary	2008-08-06 13:30:00	Slimy sculpin	22	0.1
Kwethluk	Main channel	Kwethluk Boundary	2008-08-06 13:30:00	Slimy sculpin	21	0.1
Kwethluk	Main channel	Kwethluk Boundary	2008-08-06 13:30:00	Slimy sculpin	23	0.1
Kwethluk	Main channel	Kwethluk Boundary	2008-06-18 12:00:00	Sockeye salmon	34	0.2
Kwethluk	Main channel	Kwethluk Boundary	2008-08-06 13:30:00	Sockeye salmon	33	0.2
Kwethluk	Main channel	Kwethluk Boundary	2008-06-18 12:00:00	Sockeye salmon	27	0.3
Kwethluk	Main channel	Kwethluk Boundary	2008-06-18 12:00:00	Sockeye salmon	30	0.2
Kwethluk	Main channel	Kwethluk Boundary	2008-06-18 12:00:00	Sockeye salmon	27	0.1
Kwethluk	Main channel	Kwethluk Boundary	2008-06-18 12:00:00	Sockeye salmon	31	0.3
Kwethluk	Main channel	Kwethluk Boundary	2008-08-06 13:30:00	Sockeye salmon	32	0.2
Kwethluk	Main channel	Lower Main	2008-07-01 10:32:00	Alaska blackfish	86	3.3
Kwethluk	Main channel	Lower Main	2008-07-01 10:32:00	Coho Salmon	54	1.3
Kwethluk	Main channel	Lower Main	2008-07-01 10:32:00	Coho Salmon	49	0.9
Kwethluk	Main channel	Lower Main	2008-07-01 10:32:00	Coho Salmon	48	0.9
Kwethluk	Main channel	Lower Main	2008-07-01 10:32:00	Coho Salmon	48	0.7
Kwethluk	Main channel	Lower Main	2008-07-01 10:32:00	Coho Salmon	52	1
Kwethluk	Main channel	Lower Main	2008-07-01 10:32:00	Coho Salmon	54	1.5
Kwethluk	Main channel	Lower Main	2008-07-01 10:32:00	Coho Salmon	54	1.2
Kwethluk	Main channel	Lower Main	2008-07-01 10:32:00	Coho Salmon	49	1
Kwethluk	Main channel	Lower Main	2008-07-01 10:32:00	Coho Salmon	34	0.5
Kwethluk	Main channel	Lower Main	2008-07-01 10:32:00	Coho Salmon	42	0.5
Kwethluk	Main channel	Lower Main	2008-07-01 10:32:00	Coho Salmon	41	0.7
Kwethluk	Main channel	Lower Main	2008-07-01 10:32:00	Slimy sculpin	26	0.2
Kwethluk	Main channel	Lower Main	2008-07-01 10:32:00	Slimy sculpin	52	1.2
Kwethluk	Main channel	Lower Main	2008-07-01 10:32:00	Slimy sculpin	49	1.4
Kwethluk	Main channel	Lower Main	2008-07-01 10:32:00	Slimy sculpin	26	0.2
Kwethluk	Main channel	Lower Main	2008-07-01 10:32:00	Slimy sculpin	41	0.8
Kwethluk	Main channel	Lower Main	2008-07-01 10:32:00	Slimy sculpin	27	0.2
Kwethluk	Main channel	Lower Main	2008-07-01 10:32:00	Slimy sculpin	50	1.1
Kwethluk	Main channel	Lower Main	2008-07-01 10:32:00	Slimy sculpin	26	2
Kwethluk	Main channel	Lower Main	2008-07-01 10:32:00	Slimy sculpin	53	2
Kwethluk	Main channel	Lower Main	2008-07-01 10:32:00	Slimy sculpin	26	0.2
Kwethluk	Main channel	Lower Main	2008-07-01 10:32:00	Slimy sculpin	31	0.5
Kwethluk	Main channel	Lower Main	2008-07-01 10:32:00	Slimy sculpin	30	0.2
Kwethluk	Main channel	Lower Main	2008-07-01 10:32:00	Slimy sculpin	32	0.3
Kwethluk	Main channel	Lower Main	2008-07-01 10:32:00	Slimy sculpin	41	0.7
Kwethluk	Main channel	Lower Main	2008-07-01 10:32:00	Slimy sculpin	28	2
Kwethluk	Main channel	Lower Main	2008-07-01 10:32:00	Slimy sculpin	47	0.8
Kwethluk	Main channel	Lower Main	2008-07-01 10:32:00	Slimy sculpin	65	2.6
Kwethluk	Main channel	Lower Main	2008-07-01 10:32:00	Slimy sculpin	48	1.1
Kwethluk	Main channel	Lower Main	2008-07-01 10:32:00	Slimy sculpin	78	5.4
Kwethluk	Main channel	Lower Main	2008-07-01 10:32:00	Slimy sculpin	56	1.6
Kwethluk	Main channel	Lower Main	2008-07-01 10:32:00	Slimy sculpin	58	1.9
Kwethluk	Main channel	Lower Main	2008-07-01 10:32:00	Slimy sculpin	54	1.6
Kwethluk	Main channel	Lower Main	2008-07-01 10:32:00	Slimy sculpin	51	1.3
Kwethluk	Main channel	Lower Main	2008-07-01 10:32:00	Slimy sculpin	26	0.2
Kwethluk	Main channel	Lower Main	2008-07-01 10:32:00	Slimy sculpin	36	0.3
Kwethluk	Main channel	Lower Main	2008-07-01 10:32:00	Slimy sculpin	34	0.4
Kwethluk	Main channel	Lower Main	2008-07-01 10:32:00	Slimy sculpin	43	0.5
Kwethluk	Main channel	Lower Main	2008-07-01 10:32:00	Slimy sculpin	49	1.1
Kwethluk	Main channel	Lower Main	2008-07-01 10:32:00	Slimy sculpin	51	1.4
Kwethluk	Main channel	Lower Main	2008-07-01 10:32:00	Slimy sculpin	36	0.4
Kwethluk	Main channel	Lower Main	2008-07-01 10:32:00	Slimy sculpin	49	1
Kwethluk	Main channel	Lower Main	2008-07-01 10:32:00	Slimy sculpin	52	1.3
Kwethluk	Main channel	Lower Main	2008-07-01 10:32:00	Slimy sculpin	47	0.5
Kwethluk	Main channel	Lower Main	2008-07-01 10:32:00	Slimy sculpin	31	0.2
Kwethluk	Main channel	Lower Main	2008-07-01 10:32:00	Slimy sculpin	52	1.2
Kwethluk	Main channel	Lower Main	2008-07-01 10:32:00	Slimy sculpin	29	0.2
Kwethluk	Main channel	Lower Main	2008-07-01 10:32:00	Slimy sculpin	31	0.3
Kwethluk	Main channel	Lower Main	2008-07-01 10:32:00	Slimy sculpin	38	0.6
Kwethluk	Main channel	Lower Main	2008-07-01 10:32:00	Slimy sculpin	89	7
Kwethluk	Main channel	Lower Main	2008-07-01 10:32:00	Slimy sculpin	44	0.8
Kwethluk	Main channel	Lower Main	2008-07-01 10:32:00	Slimy sculpin	51	1.2
Kwethluk	Main channel	Lower Main	2008-07-01 10:32:00	Slimy sculpin	54	1.7
Kwethluk	Main channel	Lower Main	2008-07-01 10:32:00	Slimy sculpin	51	1.3
Kwethluk	Main channel	Lower Main	2008-07-01 10:32:00	Slimy sculpin	47	1.3
Kwethluk	Main channel	Lower Main	2008-07-01 10:32:00	Slimy sculpin	51	1.3
Kwethluk	Main channel	Midway Main	2008-08-31 14:17:00	Arctic lamprey	126	2.7
Kwethluk	Main channel	Midway Main	2008-08-31 14:17:00	Arctic lamprey	139	2.7
Kwethluk	Main channel	Midway Main	2008-08-31 14:17:00	Arctic lamprey	23	0.2
Kwethluk	Main channel	Midway Main	2008-08-31 14:17:00	Arctic lamprey	18	0.1
Kwethluk	Main channel	Midway Main	2008-07-24 11:30:00	Chinook salmon	34	0.9
Kwethluk	Main channel	Midway Main	2008-07-24 11:30:00	Chinook salmon	60	2.3
Kwethluk	Main channel	Midway Main	2008-07-24 11:30:00	Chinook salmon	55	1.8
Kwethluk	Main channel	Midway Main	2008-07-24 11:30:00	Chinook salmon	48	1.3
Kwethluk	Main channel	Midway Main	2008-07-24 11:30:00	Chinook salmon	50	1.7
Kwethluk	Main channel	Midway Main	2008-07-24 11:30:00	Chinook salmon	51	0.8
Kwethluk	Main channel	Midway Main	2008-08-31 14:17:00	Chinook salmon	75	3.9
Kwethluk	Main channel	Midway Main	2008-07-24 11:30:00	Chinook salmon	52	1.7
Kwethluk	Main channel	Midway Main	2008-08-31 14:17:00	Chinook salmon	54	1.4
Kwethluk	Main channel	Midway Main	2008-07-24 11:30:00	Chinook salmon	50	0.8
Kwethluk	Main channel	Midway Main	2008-07-24 11:30:00	Chinook salmon	57	2.1
Kwethluk	Main channel	Midway Main	2008-07-24 11:30:00	Chinook salmon	51	1.3
Kwethluk	Main channel	Midway Main	2008-06-30 11:00:00	Chum Salmon	45	0.8
Kwethluk	Main channel	Midway Main	2008-06-30 11:00:00	Chum Salmon	45	1.1
Kwethluk	Main channel	Midway Main	2008-07-24 11:30:00	Chum Salmon	53	1.3
Kwethluk	Main channel	Midway Main	2008-07-24 11:30:00	Chum Salmon	28	0.1
Kwethluk	Main channel	Midway Main	2008-07-24 11:30:00	Chum Salmon	44	0.6
Kwethluk	Main channel	Midway Main	2008-07-24 11:30:00	Chum Salmon	40	0.5
Kwethluk	Main channel	Midway Main	2008-06-30 11:00:00	Coho Salmon	44	1.1
Kwethluk	Main channel	Midway Main	2008-06-30 11:00:00	Coho Salmon	41	0.5
Kwethluk	Main channel	Midway Main	2008-06-30 11:00:00	Coho Salmon	45	0.7
Kwethluk	Main channel	Midway Main	2008-06-30 11:00:00	Coho Salmon	42	0.6
Kwethluk	Main channel	Midway Main	2008-06-30 11:00:00	Coho Salmon	40	0.6
Kwethluk	Main channel	Midway Main	2008-06-30 11:00:00	Coho Salmon	49	1.8
Kwethluk	Main channel	Midway Main	2008-06-30 11:00:00	Coho Salmon	48	1.3
Kwethluk	Main channel	Midway Main	2008-06-30 11:00:00	Coho Salmon	52	1.3
Kwethluk	Main channel	Midway Main	2008-06-30 11:00:00	Coho Salmon	43	0.1
Kwethluk	Main channel	Midway Main	2008-06-30 11:00:00	Coho Salmon	45	0.1
Kwethluk	Main channel	Midway Main	2008-06-30 11:00:00	Coho Salmon	46	0.9
Kwethluk	Main channel	Midway Main	2008-06-30 11:00:00	Coho Salmon	46	1.2
Kwethluk	Main channel	Midway Main	2008-06-30 11:00:00	Coho Salmon	40	0.6
Kwethluk	Main channel	Midway Main	2008-06-30 11:00:00	Coho Salmon	40	0.8
Kwethluk	Main channel	Midway Main	2008-06-30 11:00:00	Coho Salmon	40	0.4
Kwethluk	Main channel	Midway Main	2008-06-30 11:00:00	Coho Salmon	39	0.8
Kwethluk	Main channel	Midway Main	2008-06-30 11:00:00	Coho Salmon	47	1.4
Kwethluk	Main channel	Midway Main	2008-06-30 11:00:00	Coho Salmon	45	1
Kwethluk	Main channel	Midway Main	2008-06-30 11:00:00	Coho Salmon	40	0.8
Kwethluk	Main channel	Midway Main	2008-06-30 11:00:00	Coho Salmon	44	0.9
Kwethluk	Main channel	Midway Main	2008-06-30 11:00:00	Coho Salmon	49	1.5
Kwethluk	Main channel	Midway Main	2008-06-30 11:00:00	Coho Salmon	51	1.4
Kwethluk	Main channel	Midway Main	2008-06-30 11:00:00	Coho Salmon	50	1.4
Kwethluk	Main channel	Midway Main	2008-06-30 11:00:00	Coho Salmon	46	1.1
Kwethluk	Main channel	Midway Main	2008-06-30 11:00:00	Coho Salmon	51	1.4
Kwethluk	Main channel	Midway Main	2008-06-30 11:00:00	Coho Salmon	51	1.4
Kwethluk	Main channel	Midway Main	2008-06-30 11:00:00	Coho Salmon	46	1
Kwethluk	Main channel	Midway Main	2008-06-30 11:00:00	Coho Salmon	43	1.2
Kwethluk	Main channel	Midway Main	2008-06-30 11:00:00	Coho Salmon	49	1.3
Kwethluk	Main channel	Midway Main	2008-06-30 11:00:00	Coho Salmon	48	1.5
Kwethluk	Main channel	Midway Main	2008-06-30 11:00:00	Coho Salmon	40	0.4
Kwethluk	Main channel	Midway Main	2008-06-30 11:00:00	Coho Salmon	44	0.8
Kwethluk	Main channel	Midway Main	2008-06-30 11:00:00	Coho Salmon	45	1
[truncated: 6,409 more rows]
